# Supplementary material
Source: publisher figshare collection journal article supplement (https://geolsoc.figshare.com/ndownloader/files/27911889)
Supplement: Supplementary file 1 [file 27911889]

## Sheet: Tab. S1
Ref	Nation	General location	Sepecific location	Series	Sample	Age	Age Ma	Symbol	SiO2	TiO2	Al2O3	Fe2O3	FeO	CaO	MnO	MgO	K2O	Na2O	P2O5	LOI	Sum	Sc	V	Cr	Co	Ni	Rb	Sr	Y	Zr	Nb	Ba	La	Ce	Pr	Nd	Sm	Eu	Gd	Tb	Dy	Ho	Er	Tm	Yb	Lu	Hf	Ta	Pb
					name			key
	OROGENIC
Conticelli et al. 2009	Spain	Murcia-Almeria	-	CA	Alm 34	Miocene	14	1	60.03	0.506	16.35	3.64176	1.6	5.16	0.06	2.79	1.58	2.15	0.13	5.07	99.0678	21	133	30	11	9	115	144	14	101	5	243	18.5	39.8	4.11	16.4	3.3	0.8	2.7	0.5	3	0.6	1.6	0.26	1.7	0.25	2.8	0.5	16
Conticelli et al. 2009	Spain	Murcia-Almeria	-	CA	Alm 32	Miocene	14	1	62.04	0.509	15.73	2.39163	2.05	8.27	0.092	2.19	1.62	2.44	0.11	1.63	99.0726	32	215	80	13	20	83	155	16	71	3	192	12	24.1	2.74	11	2.6	0.71	2.6	0.5	2.9	0.6	1.7	0.27	1.7	0.27	2.1	0.4	10
Conticelli et al. 2009	Spain	Murcia-Almeria	Cerro Amatista	CA	CG 378	Miocene	12.3027	1	62.5911	0.642173	14.7285	3.8551	2.01594	6.5253	0.0517881	3.42583	1.53293	2.85169	0.15	1.62	99.9904	25.327	-	4.46336	-	< 3	33.3195	220.469	17.7496	138.157	6.57733	220.054	19.099	31.5549	-	-	-	-	-	-	-	-	-	-	-	-	-	-	-
Conticelli et al. 2009	Spain	Murcia-Almeria	Cerro Amatista	CA	Alm 29	Miocene	12.3	1	60.86	0.753	17.16	1.37104	2.42	7.61	0.044	2.4	1.81	2.45	0.11	2.16	99.148	31	180	60	9	< 20	73	218	21	130	6	248	22.3	45	5.08	20.2	4.2	1.02	3.8	0.7	4	0.8	2.3	0.34	2.1	0.31	3.6	0.5	31
Mattei et al. 2014	Spain	Murcia-Almeria	Los Frailes	CA	CG 308	Miocene	12.4243	1	64.4026	0.44894	13.7641	2.54832	2.32616	5.68318	0.0816255	3.3496	1.91	2.97729	0.0918287	2.37353	99.9571	15.3249	-	7.34754	-	< 3	140.758	288.8	8.29222	123.334	5.35321	282.46	13.8554	37.5291	-	-	-	-	-	-	-	-	-	-	-	-	-	-	-
Mattei et al. 2014	Spain	Murcia-Almeria	Cerro Amatista	CA	CG 295	Miocene	11.4874	1	58.3598	0.587682	14.8514	1.65441	5.25575	8.40684	0.119529	5.56344	1.31481	2.10661	0.0796857	1.70004	100	34.0966	-	123.172	-	14.829	55.5836	203.067	15.1316	85.0398	4.53949	147.382	< 3	17.6536	-	-	-	-	-	-	-	-	-	-	-	-	-	-	-
Mattei et al. 2014	Spain	Murcia-Almeria	Cerro Amatista	CA	CG 299	Miocene	11.2681	1	56.5316	0.687783	15.5726	1.82583	5.74602	9.11569	0.13345	5.32355	1.23185	2.29615	0.0923887	1.44302	100	35.4507	-	105.416	-	19.9605	48.6537	231.729	12.6832	87.1192	3.74259	150.639	9.35648	17.1536	-	-	-	-	-	-	-	-	-	-	-	-	-	-	-
Mattei et al. 2014	Spain	Murcia-Almeria	Cerro del Cinto	CA	CG 324 B	Miocene	11.56	1	61.9125	0.525859	13.6525	3.10236	3.11253	7.66961	0.109141	4.43308	1.50812	2.23526	0.079375	1.65971	100	32.739	-	133.978	-	14.2037	56.6133	156.039	13.5993	98.5192	6.74927	188.879	6.5478	28.7096	-	-	-	-	-	-	-	-	-	-	-	-	-	-	-
Conticelli et al. 2009	Spain	Murcia-Almeria	Cerro Negro	CA	Alm 25	Miocene	11.93	1	56.92	0.617	15.51	2.72075	5.11	8.79	0.131	5.25	1.32	1.92	0.11	1.05	99.4487	38	256	60	18	< 20	57	194	15	60	3	129	9.2	19	2.38	10	2.5	0.77	2.5	0.5	2.9	0.5	1.6	0.25	1.6	0.24	1.8	0.3	8
Mattei et al. 2014	Spain	Murcia-Almeria	Cerro del Cinto	CA	CG 81	Miocene	11.6029	1	61.6511	0.533819	13.557	1.877	4.47723	7.58427	0.120865	4.94822	1.51081	2.33947	0.0805765	1.31962	100	33.907	-	153.964	-	13.2145	80.8236	143.003	17.5169	104.179	7.2731	224.134	12.395	13.7267	-	-	-	-	-	-	-	-	-	-	-	-	-	-	-
Conticelli et al. 2009	Spain	Murcia-Almeria	El Barronal	HKCA	Alm 17	Miocene	12.66	1	60.77	0.607	16.55	0.883234	4.19	5.9	0.083	2.91	2.4	2.96	0.14	1.94	99.3332	21	158	20.6182	10	5.57993	126	241	16	128	4	273	17.7	38.2	4.33	17.3	3.9	1.04	3.4	0.6	3.2	0.6	1.8	0.27	1.7	0.24	3.5	0.5	31
Conticelli et al. 2009	Spain	Murcia-Almeria	El Barronal	HKCA	Alm 14	Miocene	12.5	1	61.63	0.566	15.52	0.438726	4.41	5.58	0.08	2.89	2.27	2.85	0.14	2.82	99.1947	20	150	17.8716	13	4.21465	135	221	16	113	4	253	18.6	38.7	4.51	17.6	3.9	0.97	3.4	0.6	3.2	0.6	1.8	0.26	1.6	0.24	3.1	0.4	35
Conticelli et al. 2009	Spain	Murcia-Almeria	El Barronal	HKCA	Alm 13	Miocene	12.5	1	60.1	0.632	15.92	0.411808	5.28	6.61	0.105	4.07	2.19	2.88	0.14	1.45	99.7888	25	174	70	13	20	101	242	17	126	4	266	17	36.4	4.27	17.2	3.8	1.06	3.5	0.6	3.4	0.7	1.9	0.29	1.8	0.28	3.4	0.5	25
Conticelli et al. 2009	Spain	Murcia-Almeria	Mesa Roldan	HKCA	Alm 27	Miocene	8.25	1	55.01	0.509	18.25	4.72059	1.79	5.01	0.111	3.41	2.98	2.86	0.1	5.04	99.7906	23	122	18.0009	12	9.78584	72	229	12	67	3	314	9.6	19	2.16	8.8	2	0.68	2	0.4	2.3	0.5	1.4	0.22	1.5	0.24	1.9	0.4	7
Mattei et al. 2014	Spain	Murcia-Almeria	Cerro Cañadillas	HKCA/SHO	CG 105	Miocene	13.3556	1	62.6304	0.598702	13.3846	3.02733	1.96675	2.79056	0.0710325	1.26033	2.58761	3.36284	0.0913275	8.22859	100	19.5622	-	<3	-	<3	79.6236	163.265	18.7163	169.187	9.30528	195.834	4.5469	42.0852	-	-	-	-	-	-	-	-	-	-	-	-	-	-	-
Mattei et al. 2014	Spain	Murcia-Almeria	Punta Baja	HKCA/SHO	CG 331	Miocene	12.1372	2	65.8984	0.520146	14.374	2.68127	1.13456	2.25063	0.0400112	2.84326	4.55127	2.19933	0.100028	3.40702	100	12.205	-	2.13588	-	<3	212.368	108.218	15.5614	161.92	9.86574	353.234	8.95037	21.2571	-	-	-	-	-	-	-	-	-	-	-	-	-	-	-
Mattei et al. 2014	Spain	Murcia-Almeria	Punta Negra	HKCA/SHO	CG 124	Miocene	13.4	2	65.6031	0.515857	13.5016	3.77168	0.483247	0.91267	0.406733	1.59	10.01	1.27378	0.0892829	1.84041	99.9984	14.5709	-	16.8663	-	4.69062	541.916	87.3253	22.4551	171.557	5.08982	447.405	16.3673	24.9501	-	-	-	-	-	-	-	-	-	-	-	-	-	-	-
Conticelli et al. 2009	Spain	Murcia-Almeria	Cerro Cañadillas	HKCA/SHO	Alm 40	Miocene	13.36	2	70.51	0.408	13.38	2.14661	0.21	0.45	0.103	1.13	6.02	1.58	0.08	4.07	100.088	9	38	10	3	< 20	278	41	22	185	7	411	25.7	55.8	6.08	23.8	5	0.95	4.2	0.7	4.3	0.8	2.5	0.38	2.4	0.38	5.1	0.7	14
Conticelli et al. 2009	Spain	Murcia-Almeria	Cerro Cañadillas	HKCA/SHO	Alm 39	Miocene	12.63	3	59.92	0.552	13.91	4.92098	0.44	2.9	0.944	3.02	6.74	2.61	0.14	3.86	99.957	21	136	23	12	< 20	453	81	14	120	6	553	15.7	39.5	3.84	15.5	3.5	0.81	2.9	0.5	3	0.5	1.6	0.26	1.7	0.25	3.5	2.6	28
Benito et al. 1999	Spain	Murcia-Almeria	Mazarròn	SHO	MAZ 7	Miocene	8.3	2	63.68	0.71	15.53	0.49	3.54	2.71	0.07	1.56	4.55	1.74	0.32	4.69	99.59	14.6	108	97	11.1	34	230	535	30	245	29	1211	52.4	113	-	54.1	9.47	1.97	-	1.01	-	-	-	-	2.33	0.36	6.25	2.25	67
Turner et al. 1999	Spain	Murcia-Almeria	Mazarròn	SHO	B 301a	Miocene	8.3	2	67.19	0.56	15.75	2.98	-	2.7	0.03	1.77	4.49	2.31	0.36	1.5	99.64	12	107	87	9	25	220	404	22.1	180	18.7	1119	-	-	-	-	-	-	-	-	-	-	-	-	-	-	-	-	83
Turner et al. 1999	Spain	Murcia-Almeria	Mazarròn	SHO	B 303	Miocene	8.3	2	70.92	0.61	11.8	2.75	-	2.04	0.03	1.28	5.36	1.39	0.34	1.94	98.46	12	91	107	8	26	199	521	18.4	199	17.9	6541	-	-	-	-	-	-	-	-	-	-	-	-	-	-	-	-	61
Benito et al. 1999	Spain	Murcia-Almeria	Cartagena	SHO	ATA 1	Miocene	6.8	2	58.24	0.73	16.25	1.73	2.91	5.5	0.08	2.94	4.67	2.12	0.57	3.94	99.68	19.5	98	132	18.4	80	185	513	32	229	27	1564	62.2	139	-	69.5	11.8	2.31	-	1.14	-	-	-	-	2.21	0.31	7.25	2.02	215
Benito et al. 1999	Spain	Murcia-Almeria	Cartagena	SHO	BEA 1	Miocene	6.8	2	59.16	0.89	15.05	1.22	3.45	5.19	0.07	3.19	5.15	2.03	0.79	3.32	99.51	20.9	134	193	16.9	75	339	624	31	339	35	2168	75.6	186	-	106	17.9	3.1	-	1.42	-	-	-	-	2.14	0.31	10.4	2.62	90
Conticelli et al. 2009	Spain	Murcia-Almeria	Zeneta	LMP	SP 035	Miocene	8.08	3	64.7	1.06	12.5	2.75	-	3.69	0.04	2.38	7.18	1.98	0.89	2.79	99.96	9.77291	76.0825	399.363	15.3575	178.626	310.55	548.624	21.6768	322.883	25.7	1880.97	50.5589	137.262	18.4859	82.6079	17.7962	2.90683	10.5791	1.11092	4.78109	0.764257	1.88586	0.240934	1.46368	0.209569	9.3975	2.56	114.239
Conticelli et al. 2009	Spain	Murcia-Almeria	Zeneta	LMP	SP 040	Miocene	8.08	3	68.5	1.01	12.3	3.13	-	2.32	0.03	1.73	7.28	2.01	0.91	1.63	100.85	10.3607	82.4644	342.392	10.5602	88.8123	314.393	492.207	21.0128	354.873	25.1632	1919.72	47.6211	131.942	17.3579	76.034	16.643	2.77617	10.4128	1.08768	4.71513	0.74791	1.86389	0.23411	1.40573	0.199925	7.0225	2.125	110.513
Conticelli et al. 2009	Spain	Murcia-Almeria	Fortuna	LMP	SP 050	Miocene	7.13	3	56.75	1.54	11.66	5.98	-	2.693	0.07	9.23	8.484	1.04	0.861111	1.84	100.148	18.6752	131.023	566.85	38.2788	479.186	753.475	649.491	33.5501	593.942	28.5341	1765.87	85.5794	228.421	33.8281	148.706	28.9655	4.601	16.7565	1.665	7.19126	1.2138	3.18502	0.414344	2.51987	0.369471	15.6275	2.0275	72.7241
Conticelli et al. 2009	Spain	Murcia-Almeria	Fortuna	LMP	SP 049	Miocene	7.13	3	57.14	1.346	11.45	5.58	-	2.78	0.07	9.06	7.84	1.16	0.75	2.26	99.436	20.2132	142.373	543.192	41.4815	430.43	902.662	703.28	35.5283	686.92	33.3047	1841.1	87.4191	235.174	34.7818	152.262	30.0488	4.74302	17.3643	1.73821	7.39546	1.24639	3.26938	0.424447	2.57752	0.383805	16.6225	2.485	83.2747
Conticelli et al. 2009	Spain	Murcia-Almeria	Cancarix	LMP	SP 725	Miocene	7.04	3	55.92	1.49	9.3	4.67	-	4.12	0.08	11.79	8.93	1.08	1.24	1.22	99.84	12.74	81.8502	810.327	32.092	470.32	696.496	961.676	29.6641	872.128	38.9161	1814.54	108.997	295.337	43.0526	187.998	35.8947	5.46419	18.6047	1.72324	6.45026	1.03771	2.53018	0.322581	1.89812	0.2795	23.935	2.585	109.976
Conticelli et al. 2009	Spain	Murcia-Almeria	Cancarix	LMP	SP 723	Miocene	7.04	3	57.81	1.58	9.84	4.75	-	3.19	0.07	10.23	9.2	1.02	1.18	0.79	99.66	15.8513	107.374	757.487	40.5263	601.327	745.766	978.356	32.8439	859.827	35.6543	1893.44	118.408	328.316	48.9251	214.089	40.1739	6.08591	21.2965	1.91237	7.2262	1.15103	2.92826	0.36323	2.14175	0.314087	23.65	2.41	110.514
Conticelli et al. 2009	Spain	Murcia-Almeria	Calasparra	LMP	SP 078	Miocene	7.04	3	53.06	1.71	9.41	5.74	-	2.9	0.07	14.6	8.58	0.64	1.13	1.62	99.46	12.8237	86.0161	897.497	40.4288	573.992	716.338	578.965	22.4096	746.07	28.1981	1823.04	80.6507	232.959	35.4426	157.057	30.6013	4.62191	15.9036	1.46087	5.27289	0.813937	1.94056	0.23776	1.37143	0.196668	21.0375	2.2175	66.1264
Conticelli et al. 2009	Spain	Murcia-Almeria	Jumilla	LMP	SP 452	Miocene	6.76	3	50.28	1.35	8.8	6.12	-	5.94	0.01	14.45	7.04	1.09	1.62	2.51	99.21	16.7944	82.3235	907.95	43.4689	558.352	322.162	1617.47	33.7532	749.145	32.2901	3775.73	105.064	271.972	38.1722	167.051	31.9756	5.17626	18.8438	1.80994	7.26923	1.17042	2.83961	0.353876	2.11638	0.303977	19.2225	2.689	68.3347
Conticelli et al. 2009	Spain	Murcia-Almeria	Jumilla	LMP	SP 055	Miocene	6.76	3	52.7	1.34	9.53	5.36	-	4.87	0.03	13.07	6.97	1.75	1.15	2.63	99.4	15.0235	93.5982	940.72	39.6313	464.014	735.747	842.213	26.6321	670.558	29.4989	2592.96	80.5155	223.377	33.0343	145.9	27.9095	4.31915	15.2332	1.44503	5.69029	0.921193	2.26316	0.284199	1.69892	0.250818	18.695	2.8075	63.6098
Conticelli et al. 2009	Spain	Murcia-Almeria	Vera	LMP	Alm 02	Miocene	6.44	3	54.67	1.54	10.82	0.5	4.1	4.99	0.07	7.58	3.47	2.84	0.6	8.81	99.99	14	93	550	23	290	389	467	21	672	32	1550	93.8	252	33.4	149	26.8	4.49	13.4	1.3	5.3	0.9	2.2	0.29	1.7	0.21	18.4	3.3	54
Conticelli et al. 2009	Spain	Murcia-Almeria	Vera	LMP	Alm 01	Miocene	6.44	3	58.13	1.71	10.92	1.11	2.82	6.7	0.07	3.52	6.82	1.89	0.76	5.54	99.99	15	97	610	23	300	444	484	22	693	35	1580	99	267	35.3	155	28.1	4.79	14.3	1.4	5.5	0.9	2.3	0.31	1.8	0.23	18.9	3.4	52
Conticelli et al. 2009	Spain	Murcia-Almeria	Vera	LMP	SP 011	Miocene	6.44	3	66.5	1.45	9.82	3.59	-	2.25	0.03	2.68	7.34	1.11	0.54	4.53	99.84	9.19501	92.0562	581.178	16.8688	156.724	513.721	447.532	19.4504	623.972	42.1596	1384.39	74.5755	236.234	30.3288	128.161	23.7176	3.69279	12.9953	1.173	4.44341	0.705974	1.79095	0.223739	1.27769	0.184471	16.5825	2.42	38.4974
Conticelli et al. 2009	Spain	Murcia-Almeria	Vera	LMP	Alm 09	Miocene	6.37	3	68.04	1.515	11.6	2.53	-	1.79	0.033	2.47	9.25	1.13	0.82	1.34	100.518	13	84	390	13	50	703	481	26	787	42	1720	111	292	38.1	167	29.2	4.86	14.8	1.5	6.2	1	2.5	0.33	1.9	0.27	22	4.2	39
Conticelli et al. 2009	Spain	Murcia-Almeria	Vera	LMP	Alm 10	Miocene	6.37	3	69.2	1.427	10.92	2.31	-	1.68	0.029	2.21	8.78	1.06	0.79	1.63	100.036	12	79	360	10	30	648	464	25	747	40	1618	103	269	34.8	151	27.4	4.44	14	1.4	5.8	1	2.5	0.33	2	0.27	21.4	4.1	40
Benito et al. 1999	Spain	Murcia-Almeria	Jumilla	LMP	JUM-5	Miocene		3	48.99	1.54	8.45	3.94	1.98	7.65	-	16.68	6.86	1.13	1.25	1.78	100.25	15.5	128	911	45.2	714	326	867	31	538	54	2185	89.2	238	-	147	28	4.73	-	1.94	-	-	-	-	2.14	-	17.6	3.35	170
Benito et al. 1999	Spain	Murcia-Almeria	Jumilla	LMP	JUM-5	Miocene		3	54.05	0.91	13.35	5.31	1.09	7.28	-	8.37	5.77	1.39	0.65	1.74	99.91	24.8	129	666	36.5	392	265	466	28	294	26	1596	68.7	173	-	104	18	3.09	-	1.32	-	-	-	-	1.78	-	9.9	2.2	293
Benito et al. 1999	Spain	Murcia-Almeria	Vera	LMP	VER-4	Miocene		3	55.33	1.4	10.7	0.99	3.96	2.92	-	11.91	3.48	2.93	0.63	5.18	99.43	13.9	139	722	37	617	473	441	31	649	54	1554	89.5	253	-	159	25.6	4.22	-	1.53	-	-	-	-	1.67	-	17.8	3.26	205
Benito et al. 1999	Spain	Murcia-Almeria	Cancarix	LMP	CAN-1	Miocene		3	55.33	1.59	9.29	1.89	3.23	3.27	-	12.97	7.99	0.52	1.09	2.38	99.55	11.7	127	651	32.6	541	587	695	33	727	57	1814	98.5	282	-	185	30.8	5.04	-	1.78	-	-	-	-	1.95	-	21.1	3.39	206
Benito et al. 1999	Spain	Murcia-Almeria	Barqueros	LMP	BAR-1	Miocene		3	55.32	1.63	11.24	2.25	3.4	3.59	-	9.48	6.88	1.25	0.72	4.46	100.22	14.4	134	583	34.5	479	500	516	35	678	50	1274	84.7	248	-	163	26.6	4.39	-	1.65	-	-	-	-	2.27	-	19.8	3.09	113
Benito et al. 1999	Spain	Murcia-Almeria	Fortuna	LMP	FOR-1	Miocene		3	55.82	1.48	11.49	2.56	2.98	2.44	-	19.77	7.93	0.97	0.85	3.36	109.65	13.7	111	561	33.5	504	611	453	36	580	47	1475	69.2	191	-	126	22.6	3.78	-	1.54	-	-	-	-	2.19	-	17.6	2.78	75
Toscani et al. 1995	Spain	Murcia-Almeria	Cabezo Negro	LMP	SP747	Miocene		3	59.29	0.81	14.45	4.71	-	3.1	-	5.45	4.81	2.41	0.88	3.37	99.28	16	90	334	23	163	291	446	24	315	24	1889	59.2	146	-	83.3	17.4	3.3	-	-	-	-	-	-	1.5	-	-	-	113
Toscani et al. 1995	Spain	Murcia-Almeria	Cabezo Negro	LMP	SP761	Miocene		3	60.51	0.88	13.5	4.4	-	2.5	-	6.09	5.61	2.27	0.94	2.58	99.28	15	79	403	27	217	344	478	27	373	28	1931	60.2	152	-	88.7	18.6	3.55	-	-	-	-	-	-	1.57	-	-	-	117
Prelević et al. 2008	Spain	Murcia-Almeria	Cancarix	LMP	03CX02	Miocene		3	55.47	1.51	8.95	5.45	-	3.88	-	11.88	8.94	0.89	1.21	1.23	99.41	15.3	91	800.2	-	583.1	622.8	917.7	28.6	738.7	51.5	1551.5	114.75	320.35	-	194.44	35.17	5.54	-	-	-	-	-	-	2.03	-	20.81	3.24	74.8
Prelević et al. 2008	Spain	Murcia-Almeria	Cancarix	LMP	02CX05	Miocene		3	55.77	1.56	9.18	5.47	-	3.58	-	11.51	9.07	0.87	1.15	0.68	98.84	16.2	91.2	583.8	-	565.9	763.2	811.4	28.2	811.8	54.9	1751.4	110.34	312.61	-	190.13	34.25	5.34	-	-	-	-	-	-	2.14	-	22.47	3.54	145.7
Prelević et al. 2008	Spain	Murcia-Almeria	Fortuna	LMP	03FD01	Miocene		3	56.28	1.4	11.64	5.27	-	3.15	-	6.88	5.97	1.97	0.98	5.93	99.47	17.3	106.1	465.7	-	155.4	375	603	24.3	651.7	41.2	1354.6	68.97	201.35	-	132.54	24.83	3.85	-	-	-	-	-	-	1.97	-	18.04	2.57	57
Prelević et al. 2008	Spain	Murcia-Almeria	Fortuna	LMP	03FC01	Miocene		3	56.19	1.33	11.14	5.9	-	2.99	-	9.55	6.42	1.2	0.86	3.62	99.2	16.2	113.2	625.1	-	438.1	633.1	498.2	25.9	596.2	39.6	1458.1	70.35	199.25	-	117.03	22.5	3.7	-	-	-	-	-	-	2.1	-	16.35	2.44	64.3
Prelević et al. 2008	Spain	Murcia-Almeria	Fortuna	LMP	03FC02	Miocene		3	55.93	1.36	10.67	5.82	-	2.49	-	10.21	5.91	1.71	0.85	5.14	100.09	16.7	94.5	545.1	-	449.9	635.8	454.2	25.8	694.4	37.7	1371.8	72.68	184.63	-	121.25	23.93	3.81	-	-	-	-	-	-	2.05	-	19.36	2.16	65
Prelević et al. 2008	Spain	Murcia-Almeria	Fortuna	LMP	03FT01	Miocene		3	56.71	1.48	12.09	5.16	-	3.26	-	5.69	8.53	0.95	1.01	4.35	99.23	16.7	94.1	428	-	149.5	518.8	437.7	23.8	688	36.6	1315.2	72.95	191.54	-	130.01	25.6	4.19	-	-	-	-	-	-	1.86	-	18.56	2.07	51
Prelević et al. 2008	Spain	Murcia-Almeria	Calasparra	LMP	03CS01	Miocene		3	55.03	1.66	9.16	5.32	-	2.74	-	11.86	9.48	0.39	1.07	2.4	99.11	16.4	94.3	647.4	-	590.2	769.4	528.2	24	902.3	54.6	1868.1	90.74	268.12	-	170.3	31.47	4.77	-	-	-	-	-	-	1.65	-	25.63	3.76	65
Prelević et al. 2008	Spain	Murcia-Almeria	Aljorra	LMP	03A02	Miocene		3	55.32	1.02	12.18	5.82	-	5.49	-	7.96	6.61	1.24	0.84	1.45	97.93	24.5	144.6	778.7	-	387	402.4	573.8	22.5	425.7	35.1	2051.8	78.21	207.43	-	119.98	22.04	3.59	-	-	-	-	-	-	1.7	-	11.98	2.32	88
Prelević et al. 2008	Spain	Murcia-Almeria	Salmeron	LMP	03S02	Miocene		3	55.35	1.61	9.19	4.97	-	4.05	-	8.93	7.52	0.99	1.13	5.47	99.21	13.5	66.1	428	-	336.8	404.5	570.8	26	886.1	55.4	1825.4	87.76	239.92	-	156.69	30.29	5.05	-	-	-	-	-	-	1.86	-	25.1	3.9	79
Prelević et al. 2008	Spain	Murcia-Almeria	Barqueros	LMP	03B02	Miocene		3	57.9	1.46	10.94	5.92	-	2.76	-	8.64	8.52	0.93	0.75	1.28	99.1	17.9	99	604.4	-	360.9	660	471.3	30.1	992.4	56.9	1571.5	95.2	258.6	-	159.81	29.63	4.61	-	-	-	-	-	-	2.42	-	27.6	3.92	51
Conticelli et al. 2009	Spain	Murcia-Almeria	Vera	LMP	ALM 02	Miocene		3	-	-	-	-	-	-	-	-	-	-	-	-	-	14	93	550	23	290	389	467	21	672	32	1550	93.8	252	33.4	149	26.8	4.49	13.4	1.3	5.3	0.9	2.2	0.29	1.7	0.21	18.4	3.3	54
Venturelli et al. 1984; Conticelli et al. 2009	Spain	Murcia-Almeria	Vera	LMP	SP011	Miocene		3	66.5	1.45	9.82	-	3.23	2.25	0.03	2.68	7.34	1.11	0.54	4.53	99.48	9.2	92	581	16.9	157	514	448	19	624	42.2	1384	74.6	236	30.3	128	23.7	3.69	13	1.17	4.4	0.71	1.79	0.22	1.28	0.18	16.6	2.42	38
Conticelli et al. 2009	Spain	Murcia-Almeria	Cancarix	LMP	SP 725	Miocene		3	-	-	-	-	-	-	-	-	-	-	-	-	0	12.7	82	810	32.1	470	696	962	30	872	38.9	1815	109	295	43.1	188	35.9	5.46	18.6	1.72	6.5	1.04	2.53	0.32	1.9	0.28	23.9	2.59	110
Venturelli et al. 1984; Conticelli et al. 2009; Nelson et al. 1986	Spain	Murcia-Almeria	Jumilla	LMP	SP055	Miocene		3	53.4	1.44	9.88	-	5.41	4.86	0.07	12.8	6.54	1.9	0.98	2.05	99.33	15	94	941	39.6	464	232	816	27	671	29.5	2593	80.5	223	33	148.1	28	4.32	15.2	1.45	5.7	0.92	2.26	0.28	1.7	0.25	18.7	2.81	67
Conticelli et al. 2009	Spain	Murcia-Almeria	Vera	LMP	ALM 01	Miocene		3	-	-	-	-	-	-	-	-	-	-	-	-	0	15	97	610	23	300	444	484	22	693	35	1580	99	267	35.3	155	28.1	4.79	14.3	1.4	5.5	0.9	2.3	0.31	1.8	0.23	18.9	3.4	52
Conticelli et al. 2009	Spain	Murcia-Almeria	Sierra de Cabras	LMP	SP 723	Miocene		3	-	-	-	-	-	-	-	-	-	-	-	-	0	15.9	107	757	40.5	601	746	978	33	860	35.7	1893	118	328	48.9	214	40.2	6.09	21.3	1.91	7.2	1.15	2.93	0.36	2.14	0.31	23.7	2.41	111
Venturelli et al. 1984; Conticelli et al. 2009; Nelson et al. 1986	Spain	Murcia-Almeria	Cerro Negro	LMP	SP077	Miocene		3	54.6	1.75	9.52	-	5.09	2.87	0.07	13.3	8.86	0.69	0.95	1.6	99.3	12.6	86	891	36.7	523	266	584	24	802	32.5	1846	79.9	232	34.8	161.3	30.1	4.56	15.5	1.39	5.1	0.79	1.87	0.23	1.33	0.19	21.4	2.26	68
Venturelli et al. 1984; Conticelli et al. 2008	Spain	Murcia-Almeria	Cerro Negro	LMP	SP078	Miocene		3	53.6	1.71	9.41	-	5.16	2.9	0.07	14.6	8.58	0.64	1.13	1.62	99.42	12.8	86	897	40.4	574	716	579	22	746	28.2	1823	80.7	233	35.4	157	30.6	4.62	15.9	1.46	5.3	0.81	1.94	0.24	1.37	0.2	21	2.22	66
Venturelli et al. 1984; Conticelli et al. 2009	Spain	Murcia-Almeria	Cabezo Negro	LMP	SP035	Miocene		3	64.7	1.06	12.5	-	2.47	3.69	0.04	2.38	7.18	1.98	0.89	2.79	99.68	9.8	76	399	15.4	179	311	549	22	323	25.7	1881	50.6	137	18.5	82.6	17.8	2.91	10.6	1.11	4.8	0.76	1.89	0.24	1.46	0.21	9.4	2.56	114
Perez-Valera et al. 2013	Spain	Murcia-Almeria	Socovos Fault	LMP	09LA-12	Miocene		3	57	1.78	9.9	-	4.32	2.84	0.05	10.7	8.9	0.31	1.18	2.28	99.26	12	83	477	29.7	505	582	748	28	969	49	2539	117	319	46	187	36	6.6	21.8	2.38	8.8	1.12	2.16	0.31	1.96	0.27	27.3	3.8	114
Turner et al. 1999	Spain	Murcia-Almeria	Jumilla	LMP	B305A	Miocene		3	50.54	1.34	8.9	-	5.79	4.68	0.09	15.37	6.8	0.81	1.63	2.48	98.43	11	91	621	43	689	343.8	1086	34.4	710.4	52.24	3120	100.36	254.17	37.38	168.42	30.82	5.19	17.58	1.8	7.41	1.2	2.59	0.4	2.35	0.33	19.59	3.17	237.72
Venturelli et al. 1984; Conticelli et al. 2009	Spain	Murcia-Almeria	Fortuna, Cabecitos Negro	LMP	SP050	Miocene		3	57.5	1.45	11.8	-	5.3	2.93	0.07	9.15	6.84	1.14	0.79	2.28	99.25	18.7	131	567	38.3	479	753	649	34	594	28.5	1766	85.6	228	33.8	149	29	4.6	16.8	1.67	7.2	1.21	3.19	0.41	2.52	0.37	15.6	2.03	73
Conticelli et al. 2009; Nelson et al. 1986	Spain	Murcia-Almeria	Fortuna, Cabecitos Negro	LMP	SP 044 C	Miocene		3	-	-	-	-	-	-	-	-	-	-	-	-	-	16.9	113	582	32.4	371	29.9	558	31	620	38.5	2096	73	195	28.8	108.1	21.7	4.04	14.9	1.52	6.5	1.08	2.84	0.37	2.23	0.33	17.9	2.61	105
Perez-Valera et al. 2013	Spain	Murcia-Almeria	Socovos Fault	LMP	09LA-11	Miocene		3	56.2	1.64	9.5	-	4.77	2.69	0.07	12	9.9	0.22	1.12	0.87	98.98	12.3	88	434	35	470	737	495	24.3	849	41	1883	95	263	39	173	33	5.2	18.4	2.12	7.4	1.02	1.92	0.28	1.84	0.29	23.6	3.1	71
Venturelli et al. 1984; Conticelli et al. 2009	Spain	Murcia-Almeria	Zenta, Cabezo Negro	LMP	SP040	Miocene		3	68.5	1.01	12.3	-	1.92	2.32	0.03	1.73	7.28	2.01	0.91	1.63	99.64	10.4	82	342	10.6	89	314	492	21	355	25.2	1920	47.6	132	17.4	76	16.6	2.78	10.4	1.09	4.7	0.75	1.86	0.23	1.41	0.2	7	2.13	111
Venturelli et al. 1984; Conticelli et al. 2009; Nelson et al. 1986	Spain	Murcia-Almeria	Zenta, Cabecitos Negro	LMP	SP049	Miocene		3	57.4	1.46	12	-	5.26	2.87	0.07	9.27	6.84	1.36	0.75	1.86	99.14	20.2	142	543	41.5	430	306	539	36	687	33.3	1841	87.4	235	34.8	120.5	23.4	4.74	17.4	1.74	7.4	1.25	3.27	0.42	2.58	0.38	16.6	2.49	64.4
Duggen et al. 2005	Spain	Murcia-Almeria	Cancarix	LMP	CX110599-3	Miocene		3	55.69	1.54	9.23	-	4.80499	3.42	0.08	12.07	9.11	0.78	1.14	-	97.865	-	77	1039	7	151	676	864	22.9495	768	40.766	1694	109.204	293.107	42.3972	185.756	34.4789	5.28701	18.1225	1.79173	6.73181	1.03629	2.55704	0.313144	2.03152	0.282537	23.7906	2.95293	117.222
Contini et al. 1993	Spain	Murcia-Almeria	Cancarix	LMP	688BZ	Miocene		3	57.21	1.55	9.61	-	4.63	3.34	0.07	11.36	8.79	0.67	1.08	1.44	99.75	13	81	699	34	472	617	744	34	897	45	2076	105	300	-	195	36	5.54		1.75	-	-	-	-	1.93	0.26	22.7	4.18	88
Contini et al. 1993	Spain	Murcia-Almeria	Cancarix	LMP	709E	Miocene		3	56.61	1.55	9.69	-	4.55	3.29	0.07	11.28	6.13	2.07	1.03	3.77	100.04	13	81	7	36	489	1673	686	50	839	42	1843	-	-	-	-	-	-	-	-	-	-	-	-	-	-	-	-	93
Contini et al. 1993	Spain	Murcia-Almeria	Cancarix	LMP	716E	Miocene		3	56.65	1.53	9.69	-	4.58	3.37	0.07	10.33	8	1.31	1.09	3.43	100.05	13	80	681	32	402	656	658	38	832	39	1919	-	-	-	-	-	-	-	-	-	-	-	-	-	-	-	-	82
Contini et al. 1993	Spain	Murcia-Almeria	Cancarix	LMP	717E	Miocene		3	56.94	1.54	9.4	-	4.55	2.98	0.07	11.34	7.01	1.77	1.05	3.38	100.03	13	83	693	33	465	877	691	44	873	41	1831	-	-	-	-	-	-	-	-	-	-	-	-	-	-	-	-	81
Contini et al. 1993	Spain	Murcia-Almeria	Cancarix	LMP	720B	Miocene		3	57.17	1.55	9.67	-	4.66	3.09	0.07	11.71	9.16	1.01	1.13	0.53	99.75	15	86	713	32	474	703	760	33	890	44	1505	-	-	-	-	-	-	-	-	-	-	-	-	-	-	-	-	97
Contini et al. 1993	Spain	Murcia-Almeria	Cancarix	LMP	721B	Miocene		3	56.89	1.56	9.76	-	4.71	3.2	0.07	11.59	9.15	0.99	1.12	0.72	99.76	13	86	716	33	491	670	753	34	883	43	1560	112	310	-	191	35.5	5.68	-	2.04	-	-	-	-	2.11	0.28	22.3	4.2	97
Contini et al. 1993	Spain	Murcia-Almeria	Cancarix	LMP	722B	Miocene		3	56.5	1.51	9.5	-	4.72	3.46	0.08	12.23	9.1	0.96	1.23	0.54	99.83	14	83	716	37	479	566	837	34	852	45	2003	-	-	-	-	-	-	-	-	-	-	-	-	-	-	-	-	117
Contini et al. 1993	Spain	Murcia-Almeria	Cancarix	LMP	723B	Miocene		3	57.81	1.58	9.84	-	4.75	3.19	0.07	10.23	9.2	1.02	1.18	0.79	99.66	13	83	687	33	482	557	770	32	887	45	1772	107	311	-	191	35.2	5.62	-	1.94	-	-	-	-	1.81	0.22	23.4	3.72	90
Contini et al. 1993	Spain	Murcia-Almeria	Cancarix	LMP	725B	Miocene		3	55.92	1.49	9.3	-	4.67	4.12	0.08	11.79	8.93	1.08	1.24	1.22	99.84	14	82	737	34	493	556	816	33	838	45	1855	109	307	-	182	35.8	5.56	-	1.62	-	-	-	-	1.79	0.23	22.6	3.91	113
Duggen et al. 2005	Spain	Murcia-Almeria	Aljorra	LMP	AL260300-1	Miocene		3	55.55	1.02	12.2	-	5.13792	6.32	0.09	8.3	6.48	1.15366	0.85	-	97.1016	-	118	793	13	151	360	590	19.4491	428	28.5298	2101	77.6692	195.073	27.2566	119.991	22.3714	3.49374	12.4285	1.33706	5.39674	0.846939	2.0599	0.262334	1.68019	0.234603	12.9198	2.15224	83.9909
Duggen et al. 2005	Spain	Murcia-Almeria	Cartagena	LMP	CT270300-2C	Miocene		3	57.76	0.77	15.19	-	4.2651	5.62	0.08	3.61	5.46	2.0117	0.73	-	95.4968	-	101	196	10	38	355	641	24.2922	363	29.5847	1813	71.2249	162.385	21.0106	85.6887	16.0244	2.63352	9.07549	1.08717	4.81494	0.805503	2.11082	0.277906	1.77467	0.250643	7.12725	1.85569	99.9622
Perez-Valera et al. 2013	Spain	Murcia-Almeria	Socovos Fault	LMP	DC-06	Miocene		3	57	1.68	9.8	-	4.5	2.91	0.06	10.6	10	0.66	0.96	0.63	98.8	16	110	866	35	849	866	739	30.4	874	53	1276	114	335	58	250	44	6.3	21.3	2.33	7.3	1.15	2.4	0.34	2.08	0.29	38	4.6	73
Perez-Valera et al. 2013	Spain	Murcia-Almeria	Socovos Fault	LMP	DC-22	Miocene		3	56	1.62	9.6	-	4.77	2.06	0.05	11.3	9.6	0.61	1.15	2.07	98.83	16.6	103	831	35	611	614	838	34	991	66	3276	111	318	55	239	43	6.4	21.4	2.33	7.7	1.22	2.69	0.38	2.36	0.35	41	5.1	7.5
Perez-Valera et al. 2013	Spain	Murcia-Almeria	Moratella-Cehegin	LMP	TA-6	Miocene		3	55.5	1.96	9.8	-	4.95	4.66	0.04	9.9	9.3	0.47	0.97	1.87	99.42	15.4	93	536	41	563	480	584	23.6	883	48	1881	112	310	47	208	38	6.2	23.9	2.14	7.4	0.92	3	0.25	1.69	0.21	27.1		52
Perez-Valera et al. 2013	Spain	Murcia-Almeria	Socovos Fault	LMP	08LA-14D	Miocene		3	57.1	1.67	9.8	-	4.68	3.06	0.06	11	6.7	1.96	1.03	1.75	98.81	13.1	82	560	31	442	360	496	28.1	905	50	1287	90	250	38	152	27.2	4.9	15.5	1.76	6.4	1.04	2.32	0.32	1.88	0.29	63	3.9	17.6
Perez-Valera et al. 2013	Spain	Murcia-Almeria	Socovos Fault	LMP	08LA-9	Miocene		3	54.6	1.55	8.4	-	4.5	3.62	0.07	12.1	9	0.95	1.52	2.45	98.76	11.5	71	669	29.4	411	643	1685	26.2	848	59	2576	105	273	40	185	36	4.8	15.6	1.77	6.2	0.94	1.91	0.26	1.52	0.23	57	4.2	20
Perez-Valera et al. 2013	Spain	Murcia-Almeria	Socovos Fault	LMP	09LA-10	Miocene		3	56.6	1.73	9.9	-	4.59	3.49	0.05	9.2	9.3	0.65	1.08	1.99	98.58	12.9	93	396	30	424	432	745	26.1	905	48	2047	100	278	42	161	27.9	4.9	15.9	1.78	6.2	0.97	2.04	0.28	1.6	0.24	66	3.8	76
Perez-Valera et al. 2013	Spain	Murcia-Almeria	Socovos Fault	LMP	09LA-7	Miocene		3	55.4	1.71	10.6	-	4.95	3.56	0.06	8.8	10.2	0.47	1.43	1.69	98.87	12.8	95	442	28.8	365	852	640	23.8	869	47	1927	96	265	39	175	33	5.3	18.7	2.17	7.5	0.97	2.01	0.27	1.65	0.27	24.3	3.2	70
Perez-Valera et al. 2013	Spain	Murcia-Almeria	Socovos Fault	LMP	09LA-8	Miocene		3	59.8	1.64	9.7	-	3.78	5.4	0.06	4.8	9.7	0.6	0.93	2.52	98.93	12.9	101	511	24.2	148	726	515	23.5	849	47	1518	121	334	48	206	36	5.3	19.8	2.26	8	1	2.08	0.3	2	0.26	23.7	3.3	83
Perez-Valera et al. 2013	Spain	Murcia-Almeria	Socovos Fault	LMP	09-LA-9	Miocene		3	55	1.67	10.4	-	5.13	5.7	0.07	6.8	9.8	0.39	1.57	2.32	98.85	11.3	73	658	30	416	614	1675	24.7	907	57	2669	113	294	43	187	35	5.8	19.4	2.18	7.4	0.99	2.02	0.25	1.74	0.24	24.7	3.9	21.1
Conticelli et al. 2009	Italy	Western Alps	Sesia-Lanzo	LMP	VDA 15	Oligocene	30	5	48.77	1.188	10.94	7.1	-	7.78	0.115	11.34	6.47	1.41	1.33	2.04	98.483	29	181	560	34	270	321	756	31.9	472	28.3	4213	107	256	35.7	159	32.4	6.07	18.8	2	7.67	1.21	2.97	0.384	2.19	0.281	13	1.97	34
Conticelli et al. 2009	Italy	Western Alps	Sesia-Lanzo	LMP	MEC 242	Oligocene	30	5	49.3	1.05	11.3	1.63	4.6	7.65	0.1	13.6	5.94	1.6	1.1	2.3	100.17	30.81	149.04	922.2	57.3625	302.778	378.531	825.496	28.8421	462.897	36.06	3950.5	86.6667	219.121	31.5026	141.509	29.0188	4.81675	17.1429	1.60825	6.23018	0.971341	2.35897	0.286299	1.68205	0.243215	11.2675	2.38	28.3225
Conticelli et al. 2009	Italy	Western Alps	Sesia-Lanzo	LMP	MEC 247	Oligocene	30	5	56	1.24	11	2.21	2.65	3.11	0.09	9.27	9.07	1.29	1.09	1.8	98.82	16.57	95.01	571.045	41.095	259.861	645.892	550.026	28.9182	638.003	36.365	3533.5	97.6203	255.959	36.7792	168.156	34.0136	5.23885	18.7212	1.76744	6.60513	0.995382	2.34447	0.277806	1.58355	0.223967	16.575	2.28	132
Conticelli et al. 2009; Casalini 2018	Italy	Western Alps	Sesia-Lanzo	LMP	VDA 17	Oligocene	30	5	50.3	1.15	10.2	6.95	-	6.64	0.123	11.5	7.39	0.85	1.27	2.75	99.123	25	155	640	33	300	395	829	31.7	593	34.1	4293	117	273	38.2	174	34.2	6.15	19.4	1.99	7.57	1.22	2.93	0.371	2.04	0.266	16.1	2.43	36
Conticelli et al. 2009; Casalini 2018	Italy	Western Alps	Sesia-Lanzo	LMP	VDA 02	Oligocene	30	5	55.21	1.26	10.26	5.06	-	4.03	0.09	8.69	8.82	1.16	1.02	1.75	97.35	16	85	414	27	298	546	815	24	673	35	3116	102.541	236.681	38.7779	163.608	35.9834	6.88126	23.2695	2.48864	7.70345	1.12316	3.46359	0.318948	2.019	0.28232	21.0791	7.14401	22.9
Conticelli et al. 2009; Casalini 2018	Italy	Western Alps	Sesia-Lanzo	LMP	VDA 3	Oligocene	30	5	55.1	1.31	10.2	4.68	-	4.02	0.081	8.94	9.24	1.13	1.13	3.53	99.361	13	83	470	25	280	555	799	30.8	665	34.4	3797	106	260	37.1	169	33.6	5.88	19	1.85	7.29	1.18	2.77	0.343	1.93	0.251	18.1	2.73	105
Owen 2008	Italy	Western Alps	Sesia-Lanzo	LMP	WA 105	Oligocene	30	5	50.38	1.122	11.74	6.77	-	7.35	0.108	10.87	6.58	1.4	1.1	1.9	99.32	28.9	159	594	36.4	246	328	910	29	451	31	4240	114	264	35.4	155	32.8	5.68	20.7	1.75	6.78	0.95	2.66	0.344	2.1	0.245	11.6	1.69	54
Owen 2008	Italy	Western Alps	Sesia-Lanzo	LMP	WA 104	Oligocene	30	5	52.3	1.25	11.12	6.04	-	5.29	0.117	8.77	9.21	1.13	1.43	1.59	98.247	17.1	112	455	28.6	290	506	870	40	681	42.8	4740	127	298	39.3	172	39.4	7.14	26.9	2.52	9.68	1.31	3.56	0.458	2.7	0.321	5	2.35	79
Owen 2008	Italy	Western Alps	Sesia-Lanzo	LMP	WA 102	Oligocene	30	5	50.21	1.18	11.45	6.79	-	7.18	0.119	11.88	7.18	0.7	1.29	2.1	100.079	24.1	143	656	40.1	309	430	530	30	371	27.8	3470	70.2	159	21.5	95.8	22.8	4.25	15.8	1.66	5.73	1	2.66	0.354	2.15	0.27	9.2	1.75	94
Owen 2008	Italy	Western Alps	Sesia-Lanzo	LMP	WA 106	Oligocene	30	5	43.69	1.036	8.56	7.5	-	7.57	0.125	13.11	5.35	0.92	1.56	9.46	98.881	33.2	163	665	44.8	326	292	680	24	236	16.2	3250	53.9	121	16	70.7	16	3.43	12.5	1.3	5.31	0.82	2.2	0.284	1.71	0.212	6.6	0.83	40
Peccerillo and Martinotti 2006	Italy	Western Alps	Sesia-Lanzo	LMP	WA 05 av-d	Oligocene	30	5	53.83	1.28	11.61	4.95	1.26	4.98	0.13	8.82	9.35	1.1	1.32	1.4	100.03	19	120	498	24	299	496	853	37	684	41	4648	111	261	35.7	162	36.7	6.2	23.45	2.31	9.64	1.38	3.45	0.44	2.7	0.34	12	2.33	85.5
Peccerillo and Martinotti 2006	Italy	Western Alps	Sesia-Lanzo	LMP	WA 05 av-b	Oligocene	30	5	50.64	1.17	11.98	4.67	1.93	6.92	0.13	11.15	7.36	0.7	1.14	2.25	100.04	24	156	630	35	281	436	570	28	399	29	3494	66.15	152	20.3	92	21.4	3.88	14.05	1.5	6.67	1.02	2.61	0.35	2.19	0.28	10.1	1.68	91
Prelević et al. 2008, 2010	Italy	Western Alps	Sesia-Lanzo	LMP	05RR02	Oligocene	30	5	49.61	1.18	11.3	7.31	-	8.35	0.11	11.82	6.13	1.29	1.16	1.26	99.52	32.7	270.6	932.8	-	356.4	317.1	789.5	28.1	359.2	32.3	4399.6	123.57	291.7	37.62	166.25	31.63	5.34	16.43	-	7.02	-	2.35	-	1.84	0.25	9.81	1.6	32
Prelević et al. 2008, 2010	Italy	Western Alps	Sesia-Lanzo	LMP	05VdA03	Oligocene	30	5	54.83	1.24	10.1	4.89	-	4.25	0.08	8.7	8.6	1.13	1.03	3.27	98.12	15.3	91.2	507.3	-	308	606.6	847	27.9	665.4	40	3514.1	95.06	254.07	34.55	159.94	31.85	5.16	16.16	-	6.93	-	2.28	-	1.75	0.23	18.25	2.19	129
Conticelli et al. 2009; Casalini 2018	Italy	Western Alps	Sesia-Lanzo	SHO	VDA 14	Oligocene	30	6	52.21	0.935	13.89	7.25	-	7.4	0.125	7.31	3.75	2.47	0.92	3.24	99.5	27	182	310	26	140	172	882	29.3	334	24.2	2592	55.7	127	16.9	75	16.2	3.32	10.4	1.28	5.89	1.03	2.89	0.4	2.46	0.359	9.2	1.74	36
Prelević et al. 2008, 2010	Italy	Western Alps	Sesia-Lanzo	SHO	05GV02	Oligocene	30	6	49.85	0.85	13.54	7.14	-	6.59	0.12	7	3.65	2.29	0.83	2.54	94.4	27.1	172.7	371.6	-	127	158.4	656.3	25.1	281.4	27.1	2307.5	53.56	128.2	16.65	75.25	15.6	2.57	9.03	-	5.36	-	2.35	-	2.22	0.31	7.68	1.41	26
Peccerillo and Martinotti 2006	Italy	Western Alps	Sesia-Lanzo	SHO	WA 05 av-a	Oligocene	30	6	53.26	0.93	13.78	5.8	1.54	7.1	0.13	7.23	4.45	2.24	0.89	2.66	100.01	29	181	350	29	126	230	807	26	371	28	3021	54.1	126	17.6	81	18.1	3.4	11.25	1.2	5.69	0.94	2.58	0.36	2.35	0.33	10.1	1.67	36
Owen 2008	Italy	Western Alps	Sesia-Lanzo	SHO	WA 100	Oligocene	30	6	54.01	0.997	13.35	7.41	-	6.55	0.131	6.98	5.65	1.81	1	1.64	99.528	30.1	175	309	28.1	93	296	830	28	378	29	3740	60.2	140	19.7	90	20.6	3.85	13.3	1.36	5.77	0.92	2.65	0.37	2.29	0.304	11.1	1.74	41
Conticelli et al. 2009	Italy	Western Alps	Sesia-Lanzo	SHO	MEC 241	Oligocene	30	6	60	0.53	17.3	2.14	3.39	3.76	0.1	2.1	4.38	3.37	0.37	2.3	99.74	11.74	88.89	23.445	52.9475	46.2818	221.972	555.498	26.4567	370.483	38.615	2400	63.8539	131.423	16.124	57.0831	10.1822	1.79634	7.30789	0.900771	4.77551	0.909648	2.63939	0.390617	2.6087	0.41645	9.085	2.9175	28
Conticelli et al. 2009	Italy	Western Alps	Sesia-Lanzo	SHO	MEC 216	Oligocene	30	6	60.4	0.54	17.4	2.06	3.12	4.34	0.11	2.04	4.09	3.59	0.37	2.1	100.16	11.21	85.03	21.065	64.9275	59.4023	192.717	586.833	26.423	353.418	35.37	2388.21	62.1805	129.641	15.9383	57.0983	10.057	1.78701	7.33165	0.895141	4.69036	0.918233	2.66667	0.38965	2.6056	0.411186	9.345	2.385	26
Conticelli et al. 2009	Italy	Western Alps	Sesia-Lanzo	HKCA	KAW 697a	Oligocene	30	7	53.69	0.86	17.6	2.96	3.5	7.77	0.15	2.55	1.89	3.09	0.37	5.24	99.67	16.7	142.11	-	-	55.4419	57.9545	563.025	23.4921	186.667	12.8	1622	36.5482	72.5195	8.57292	32.7713	6.36936	1.50526	5.51795	0.748187	4.31877	0.855967	2.45361	0.345324	2.31959	0.366212	3.6771	0.825562	16.7266
Conticelli et al. 2009; Casalini 2018	Italy	Western Alps	Sesia-Lanzo	HKCA	VDA 08	Oligocene	30	7	54.18	0.978	17.2	7.57	-	8.08	0.143	4.52	1.82	2.82	0.41	2.47	100.191	23	177	80	16	40	63	560	27.6	167	13.5	1046	40.9	77.8	8.87	35.1	6.8	1.86	5.65	0.9	4.86	0.93	2.73	0.401	2.61	0.394	4.3	0.99	20
Owen 2008	Italy	Western Alps	Sesia-Lanzo	HKCA	WA 101	Oligocene	30	7	54.3	0.988	16.15	8.12	-	6.78	0.127	5.43	2.58	2.95	0.4	2.27	100.095	27.2	185	149	25.8	17	96	480	24	165	12.6	1200	38.4	77	9.23	37.8	8.09	1.98	6.89	0.99	4.94	0.93	2.78	0.39	2.55	0.364	4.6	0.74	20
Conticelli et al. 2009	Italy	Western Alps	Sesia-Lanzo	HKCA	VDA 10	Oligocene	30	7	54.84	0.642	14.73	7.36	-	8.45	0.137	6.83	2.34	2.2	0.29	2.2	100.019	34	202	250	25	60	79	468	20.1	97	6.2	778	23.4	46.7	5.43	21.9	4.67	1.24	4.06	0.64	3.63	0.71	2.08	0.31	2.02	0.306	2.8	0.5	18
Conticelli et al. 2009	Italy	Western Alps	Sesia-Lanzo	HKCA	MEC 251	Oligocene	30	7	59.3	0.63	17.5	1.64	3.48	5.08	0.11	2.85	2.89	3.27	0.18	2.9	99.83	15.05	108.7	32.99	23.29	36.0275	83.3935	666.096	18.4775	132.886	9.24298	1006.71	30.1549	59.3235	6.84053	25.4979	4.7823	1.11901	4.10035	0.568531	3.3234	0.680654	1.95079	0.285765	1.87433	0.290605	2.9425	0.7	11.13
Conticelli et al. 2009	Italy	Western Alps	Sesia-Lanzo	HKCA	MEC 240	Oligocene	30	7	63.07	0.42	17.06	0.69	3.97	3.23	0.11	1.08	3.18	3.63	0.22	3.56	100.22	2.26	15.57	-	-	12.8111	103.258	604.99	18.534	198.985	12.3762	1315.27	54.3719	100.566	10.4124	34.7237	5.34787	1.22917	4.33503	0.548718	3.07379	0.641548	1.91837	0.289929	2.0102	0.330218	4.43394	0.79	15.6943
Owen 2008	Italy	Western Alps	Sesia-Lanzo	CA	WA 107	Oligocene	30	7	50.22	0.637	10.26	7.95	-	7.52	0.138	16.19	0.37	2.23	0.14	3.02	98.675	33.2	163	665	44.8	326	292	680	24	236	16.2	3250	53.9	121	16	70.7	16	3.43	12.5	1.3	5.31	0.82	2.2	0.284	1.71	0.212	6.6	0.83	40
Peccerillo and Martinotti 2006	Italy	Western Alps	Sesia-Lanzo	CA	WA 05 av-c	Oligocene	30	7	50.65	0.97	16.22	5.79	2.19	7.57	0.13	4.91	1.54	3.61	0.35	6.143	100.073	29	211	46	22	8	50	566	24	152	12	1241	41.5	76	8.6	34	6.9	1.68	5.79	0.82	4.6	0.89	2.61	0.36	2.47	0.35	3.7	0.79	20
Owen 2008	Italy	Western Alps	Sesia-Lanzo	CA	WA 103	Oligocene	30	7	51.02	0.962	16.17	7.71	-	7.28	0.12	4.69	1.5	3.79	0.31	5.21	98.762	25.7	188	36.5	21.4	3	43	551	23	144	11.8	1110	43	78.9	8.8	33.7	7.1	1.79	6.28	0.92	4.6	0.88	2.62	0.371	2.37	0.344	3.8	0.74	15
Peccerillo et al. 1988	Corsica	Corsica M.P.	Sisco	LMP	SIS 10	Miocene	14.3	8	56.73	2.27	10.6	2	2.4	3.65	0.07	7.13	10.46	1.1	0.64	2.96	100.01	-	89	425	-	239	370	839	28	1257	61	1235	188	337	-	-	-	-	-	-	-	-	-	-	-	-	-	-	-
Peccerillo et al. 1988	Corsica	Corsica M.P.	Sisco	LMP	SIS 11	Miocene	14.3	8	57.83	2.15	10.65	1.81	2.56	3.53	0.07	6.88	10.15	1.3	0.66	2.69	100.28	-	85	400	-	283	342	847	25	1384	66	1230	188	333	-	-	-	-	-	-	-	-	-	-	-	-	-	-	-
Peccerillo et al. 1988	Corsica	Corsica M.P.	Sisco	LMP	SIS 08	Miocene	14.3	8	57.89	2.37	10.47	2.17	2.52	3.64	0.08	6.38	10.49	1.06	0.82	2.07	99.96	9.8	89	425	19	271	343	812	26	1351	66	1267	183	302	-	111	19	2.5	-	0.8	-	-	-	-	1.1	-	25	3	-
Peccerillo et al. 1988	Corsica	Corsica M.P.	Sisco	LMP	SIS 02	Miocene	14.3	8	58.63	2.35	10.8	1.84	2.96	3.15	0.08	6.47	10.7	0.88	0.71	1.91	100.48	-	93	421	-	254	376	847	27	1302	64	1329	193	344	-	-	-	-	-	-	-	-	-	-	-	-	-	-	-
Peccerillo et al. 1988; Conticelli et al. 2002, 2007	Corsica	Corsica M.P.	Sisco	LMP	SIS 04	Miocene	14.3	8	58.5	2.27	10.84	0.81	2.42	3.12	0.06	6.63	10.73	1.02	0.67	2.09	99.16	11.5	84	340	19	230	318	640	19.4	1040	54.8	1450	183	367	41.6	146	19.1	3.5	11.3	1.09	4.64	0.79	2.1	0.276	1.59	0.211	32.1	3.96	12
Peccerillo et al. 1988; Prelević et al. 2010	Corsica	Corsica M.P.	Sisco	LMP	SIS 07	Miocene	14.3	8	58.29	2.31	10.82	1.74	3.26	2.93	0.07	7.05	10.35	1.01	0.76	2.14	100.73	12.965	92.4275	411	27	272	317.005	681.27	16.2525	995.898	57.8275	925.028	135.015	301.695	33.3675	125.052	16.29	2.6455	8.1725	1.01	3.96	0.75	1.46775	0.21	1.258	0.18475	26.565	4.1	14.37
Peccerillo, 1988; Conticelli et al. 2009; Prelević et al. 2010	Corsica	Corsica M.P.	Sisco	LMP	SIS-4	Miocene		8	58.5	2.27	10.84	0.81	2.42	3.12	0.06	6.63	10.73	1.02	0.67	2.09	99.16	11.5	84	340	19	230	318	640	19	1040	54.8	1450	183	367	41.6	146	19.1	3.5	11.3	1.1	4.6	0.79	2.1	0.28	1.59	0.18	26.57	3.96	12
Mascle et al. 2001	Corsica	Corsica M.P.	Cornacya	SHO	SAR 1-03	Miocene	12.6	9	60.29	0.31	17.94	2.17	-	2.57	-	1.09	5.66	5.48	0.13	3.47	99.11	20.24	8.5	-	-	12.17	100.11	155.96	7.47	127.4	13.36	412.44	35.19	59.78	6.08	19.73	2.79	0.56	2	0.26	1.56	0.31	0.88	0.12	0.76	0.13	3.88	1.08	27.23
Mascle et al. 2001	Corsica	Corsica M.P.	Cornacya	SHO	SAR 1.05A	Miocene	12.6	9	41.86	0.41	18.57	6.75	-	1.84	0.04	7.13	3.35	3.94	0.27	15.51	99.67	6.35	57.56	12.32	-	233.11	63.62	435.07	10.14	240.54	18.9	816	55.31	122.74	10.67	36.24	5.2	1.4	3.74	0.44	2.37	0.41	1.13	0.15	1.07	0.15	7.83	1.73	51.17
Mascle et al. 2001	Corsica	Corsica M.P.	Cornacya	SHO	SAR 1.05B	Miocene	12.6	9	30.08	0.64	17.62	7.93	-	3.07	0.06	12.43	2.46	2.38	0.39	22.61	99.67	10.12	112.5	5.34	-	130.16	132.09	811.01	19.19	149.64	10	825.14	54.08	109.08	12.5	46.5	7.48	1.57	5.69	0.7	3.67	0.7	1.96	0.29	1.9	0.31	4.6	0.66	45.61
Mascle et al. 2001	Corsica	Corsica M.P.	Cornacya	SHO	SAR 1.06	Miocene	12.6	9	39.34	0.3	17.91	2.31	-	0.98	-	10.15	4.32	4.08	0.11	20.24	99.74	2.29	13.61	1.11	-	66.6	188.77	155.96	11.42	237.57	19.4	554.24	40.9	92.49	7.69	26.07	3.84	0.65	2.67	0.38	2.36	0.47	1.37	0.21	1.36	0.18	6.47	1.51	31.06
Mascle et al. 2001	Corsica	Corsica M.P.	Cornacya	SHO	SAR 1.07	Miocene	12.6	9	38.71	0.27	16.83	2.85	-	4.16	0.02	9.16	4.5	4.09	0.15	18.95	99.69	2.48	14.86	0.8	-	49.67	204.66	238.94	14.92	225.61	17.7	536.94	47.21	96.57	8.81	29.38	4.43	0.82	3.52	0.53	2.87	0.58	1.83	0.29	1.82	0.29	6.23	1.42	27.32
Chelazzi et al. 2006	Italy	Corsica M.P.	Capraia	HKCA	CP 4a	Miocene	7.53	10	59.74	0.74	15.06	2.62	2.44	7.14	0.11	3.53	2.95	3.01	0.25	2.41	100	17.14	97	115	14.6467	15	139	669	18.4867	183	12.4033	727	51.2867	87.2067	9.98	42.48	7.69333	1.64733	4.95667	0.610333	3.51667	0.667333	1.81667	0.251	1.97	0.266	5.35667	0.825	34.1667
Chelazzi et al. 2006	Italy	Corsica M.P.	Capraia	HKCA	CP 53	Miocene	7.41	10	61.1	0.696	15.6	5.22	0	5.98	0.08	3.61	3.35	2.95	0.24	1.35	100.176	16.4	142	150	13.6	14	119	898	25	182	12	758	51.7	98.7	12.8	52.8	8	1.599	5	0.8	3.7	0.74	2.1	0.3	1.7	0.27	5.1	1	29
Chelazzi et al. 2006	Italy	Corsica M.P.	Capraia	HKCA	CP 10	Miocene	7.51	10	61.49	0.73	16.2	1.85	3.12	5.3	0.06	4.33	2.97	2.87	0.21	0.87	100	-	126	162	13	11	120	845	33	195	9	742	64	134	-	-	-	-	-	-	-	-	-	-	-	-	-	-	51
Chelazzi et al. 2006; Conticelli et al. 2007, 2009	Italy	Corsica M.P.	Capraia	HKCA	CP 18	Miocene	7.55	10	61.63	0.79	15.99	2.53	2.78	5.25	0.07	3.63	2.86	2.98	0.26	1.23	100	21.6	119	128	16	18	139	694	22.2067	174	13.1	726	58.0233	96.8267	11.3133	48.5067	8.50333	1.80333	5.11	0.707667	3.99	0.743333	2.14667	0.317667	2.31667	0.266	5.73333	0.882	37.9133
Chelazzi et al. 2006	Italy	Corsica M.P.	Capraia	HKCA	CP 101	Miocene	7.15	10	61.8956	0.686955	15.2723	2.66672	2.45	5.47573	0.069691	3.48	3.32526	3.14	0.179206	1.35854	100	-	128.301	177.225	11.8938	19	115.731	732.874	19.3443	184.859	11.9312	711.477	58.5433	108.69	11.4842	43.6061	8.01479	1.7595	5.33553	0.766785	3.6356	0.699791	2.05403	0.28973	1.84238	0.275963	5.37303	0.897183	60.6023
Chelazzi et al. 2006	Italy	Corsica M.P.	Capraia	HKCA	CP 62	Miocene	7.55	10	62.61	0.75	15.75	2.91	2.34	5.11	0.06	3.27	2.98	2.93	0.22	1.08	100.01	23.94	106	126	15	18	142	674	26.4233	197	13.4133	728	62.7667	96.5633	11.88	52.62	9.64667	2	6.68	0.830333	4.81333	0.916667	2.49	0.347333	2.59333	0.333667	6.35333	0.963333	34.93
Chelazzi et al. 2006	Italy	Corsica M.P.	Capraia	HKCA	CP 113	Miocene	7.15	10	62.8563	0.714505	15.5782	2.13061	2.36	4.40779	0.0704442	2.7	3.92475	3.23	0.211332	1.81602	100	-	-	-	-	-	-	-	-	-	-	-	-	-	-	-	-	-	-	-	-	-	-	-	-	-	-	-	-
Chelazzi et al. 2006	Italy	Corsica M.P.	Capraia	HKCA	CP 28	Miocene	7.56	10	59.05	0.81	16.53	3.66	2.08	5.66	0.07	4.16	2.82	3.2	0.26	1.69	99.99	-	76	119	19.1	25.5	131	508	21.6	207	13	705	60.7	116.222	13.7	48.5	8.07	1.65	5.6	0.77	4.04	0.8	2.2	0.333	2.09	0.221	4.1	1.09	35.2
Chelazzi et al. 2006	Italy	Corsica M.P.	Capraia	HKCA	CP 73	Miocene	7.56	10	61.18	0.89	16.52	2.3	2.96	4.85	0.09	3.33	3.07	3.52	0.27	1.02	100	18.57	93	105	14.9	24.4	172.3	493.5	20.4833	242.8	16.68	658.8	55.57	94.22	10.8033	45.3	7.76	1.64333	5.07667	0.693	3.78333	0.732667	1.96667	0.263	2.10333	0.292	6.54333	1.10567	33.2667
Chelazzi et al. 2006	Italy	Corsica M.P.	Capraia	HKCA	CP 55	Miocene	7.56	10	61.47	0.8	16.99	4.03	0.84	4.35	0.07	3.12	3.14	4.08	0.25	0.87	100.01	-	75	83	15	12	142	509	22	241	16	702	57	108	-	-	-	-	-	-	-	-	-	-	-	-	-	-	44
Chelazzi et al. 2006	Italy	Corsica M.P.	Capraia	HKCA	CP 58	Miocene	7.56	10	63.5	0.84	16.64	3.55	1.4	3.9	0.06	2.04	3.5	3.29	0.3	0.98	100	19.1667	74	97	12.4333	14	177	492	20.8367	252	19.5467	713	64.9533	103.233	12.8467	54.44	8.66333	1.71967	5.42333	0.684333	3.86667	0.714333	2.07333	0.28	2.07667	0.344333	7.45333	1.31433	38.4267
Chelazzi et al. 2006	Italy	Corsica M.P.	Capraia	HKCA	CP 25	Miocene	7.55	10	62.2	0.67	16	4.62	0	4.92	0.09	3.06	3.95	3.27	0.29	1.1	100.17	13.2	88	100	8.03	25	164	1110	31	206	13.8	1220	127	224	27.2	103	13.9	2.62	8.1	1.1	4.9	0.91	2.3	0.3	2.3	0.35	5.3	1	53
Chelazzi et al. 2006	Italy	Corsica M.P.	Capraia	HKCA	CP 24	Miocene	7.55	10	64.57	0.64	15.7	2.76	1.44	4.24	0.06	2.45	3.75	3.38	0.28	0.72	99.99	12.9433	77	81	12.12	18	160.087	814.617	18.45	316	15.05	1145	95.4767	159.22	16.6033	66.0367	10.1533	1.96633	5.77	0.67	3.65	0.643667	1.81633	0.223667	1.76333	0.287	5.55667	0.966333	49.6033
Conticelli et al. 1992, 2007, 2009; Prelević et al. 2010; Casalini et al. 2019	Italy	Tuscan M.P.	Orciatico	LMP	ORC 1	Pliocene	4.1	11	57.8	1.51	11.8	2.24	3.12	3.46	0.08	8.23	8.06	1.31	0.85	1.55	100.01	18.5	116	500	28	280	612	577	24	749	39	1400	148	352	47.4	193	26.9	4.32	14.4	1.27	5.2	0.89	2.42	0.32	1.85	0.2	21.4	2.93	30
Conticelli et al. 1992; Prelević et al. 2010; Casalini et al. 2019	Italy	Tuscan M.P.	Orciatico	LMP	ORC 04	Pliocene	4.1	11	58.01	1.5	11.7	2.29	3.07	3.53	0.09	8.27	7.95	1.44	0.79	1.36	100	18.5	99	449	31	246	583	628	30	887	42	1003	103.36	284.49	35.13	146.36	20.46	2.99	8.73	-	3.98	-	1.6	-	1.42	0.2	16.17	1.98	36.2
Conticelli et al. 2009; Casalini et al. 2019	Italy	Tuscan M.P.	Montecatini	LMP	MVC 100	Pliocene	4.1	11	56.9	1.37	12.6	3.25	2.84	3.47	0.1	7.15	7.91	1.2	0.92	2.43	100.14	20.2	137	380	27	140	768	408	28	491	30.1	1370	79.8	206	29.8	133	23.5	4.02	13.6	1.31	5.9	0.99	2.67	0.36	2.19	0.31	13.4	2.17	19
Conticelli et al. 2009; Casalini et al. 2019	Italy	Tuscan M.P.	TorreAlfina	LMP	VS 29	Pliocene	0.88	11	55.5	1.36	13.4	0.78	5.08	4.7	0.1	9.36	7.46	1.18	0.54	0.58	100.04	17	122	520	28	310	399	579	27	532	28.5	1390	110	249	31.1	120	20	3.8	12.9	1.44	6.3	1.07	2.81	0.38	2.31	0.27	15.7	2.47	53
Conticelli et al. 2009; Casalini et al. 2019	Italy	Tuscan M.P.	TorreAlfina	LMP	VS 28	Pliocene	0.88	11	56	1.27	13.9	1.38	4.08	4.94	0.09	8.72	7.49	1.13	0.53	0.47	100	15.4	125	642	26	301	418	637	30	555	30.1	1292	94	247	29.8	116	18.4	3.68	12.4	1.39	6	1.05	2.67	0.37	2.39	0.34	16.2	2.53	55
Peccerillo et al. 1988	Italy	Tuscan M.P.	Orciatico	LMP	OR 2E	Pliocene	4.1	11	56.74	1.42	11.25	2	2.92	4.4	0.08	8.29	7.68	1.36	0.7	3.16	100	-	98	439	-	292	591	638	30	764	40	1154	143	310	-	-	-	-	-	-	-	-	-	-	-	-	-	-	-
Peccerillo et al. 1988	Italy	Tuscan M.P.	Orciatico	LMP	OR 21	Pliocene	4.1	11	57.18	1.42	11.15	2.09	2.88	4.4	0.08	8.2	7.84	1.34	0.69	2.66	99.93	-	98	463	-	299	597	641	30	777	40	1185	143	321	-	-	-	-	-	-	-	-	-	-	-	-	-	-	-
Peccerillo et al. 1988	Italy	Tuscan M.P.	Orciatico	LMP	OR 07	Pliocene	4.1	11	57.61	1.43	11.51	2.05	2.96	0.154167	0.08	8.95	7.82	1.32	0.69	2.17	96.7442	-	96	449	-	300	536	628	30	796	41	1198	145	319	-	-	-	-	-	-	-	-	-	-	-	-	-	-	-
Peccerillo et al. 1988	Italy	Tuscan M.P.	Orciatico	LMP	OR 04	Pliocene	4.1	11	57.69	1.43	11.18	2.61	2.52	3.64	0.08	8.2	7.42	1.5	0.75	2.67	99.69	-	97	442	-	297	445	649	29	787	40	1177	141	309	-	-	-	-	-	-	-	-	-	-	-	-	-	-	-
Peccerillo et al. 1988; Conticelli et al. 2007, 2009	Italy	Tuscan M.P.	Orciatico	LMP	OR 12	Pliocene	4.1	11	58.11	1.42	11.82	1.52	3.38	3.56	0.07	8.7	7.92	1.35	0.69	1.46	100	17	100	449	31	274	609	613	32	797	41	1224	139.1	338	-	178	25.88	3.8	-	1.21	-	0.85	-	0.31	1.64	0.23	18.9	2.81	41
Peccerillo et al. 1988	Italy	Tuscan M.P.	Orciatico	LMP	OR 10	Pliocene	4.1	11	58.11	1.43	11.18	1.74	3.32	3.6	0.08	8.78	7.43	1.56	0.7	2.07	100	15	97	455	28.2	307	449	646	29	787	41	1175	149	315	-	-	29	3.3	-	1.1	-	-	-	-	1.9	-	18	2.6	-
Conticelli et al. 1992	Italy	Tuscan M.P.	Orciatico	LMP	ORC 02	Pliocene	4.1	11	58.43	1.49	11.46	2.69	2.6	3.56	0.08	7.96	7.96	1.4	0.77	1.61	100.01	-	-	-	-	284	453	635	29	796	45	1200	142	320	-	-	-	-	-	-	-	-	-	-	-	-	-	-	-
Conticelli et al. 1992	Italy	Tuscan M.P.	Orciatico	LMP	ORC 05	Pliocene	4.1	11	58.54	1.58	12.18	3.81	1.6	3.53	0.09	5.98	8.3	1.18	0.66	2.56	100.01	-	-	-	-	113	632	540	38	878	49	1022	173	344	-	-	-	-	-	-	-	-	-	-	-	-	-	-	-
Conticelli et al. 1992	Italy	Tuscan M.P.	Orciatico	LMP	ORC 21	Pliocene	4.1	11	59.51	1.5	11.26	3.2	2.05	3.48	0.06	7.14	7.53	1.22	0.71	2.34	100	-	-	-	-	238	576	541	26	842	45	1140	144	331	-	-	-	-	-	-	-	-	-	-	-	-	-	-	-
Conticelli et al. 1992	Italy	Tuscan M.P.	Montecatini	LMP	MVC131	Pliocene	4.1	11	55.29	1.11	10.6	1.4	2.42	6.9	0.06	11.78	7.17	0.82	1.12	1.43	100.1	-	-	-	-	427	371	245	31	527	35	780	46	127	-	-	-	-	-	-	-	-	-	-	-	-	-	-	-
Conticelli et al. 1992	Italy	Tuscan M.P.	Montecatini	LMP	MVC132	Pliocene	4.1	11	55.78	1.2	10.83	1.2	2.24	6.29	0.06	11.34	7.55	0.83	1.19	1.48	99.99	-	-	-	-	349	580	236	32	513	35	960	61	164	-	-	-	-	-	-	-	-	-	-	-	-	-	-	-
Conticelli et al. 1992	Italy	Tuscan M.P.	Montecatini	LMP	MVC150	Pliocene	4.1	11	56.73	1.21	11.17	3.02	3.16	2.92	0.07	9.57	7.13	1.03	1.05	2.96	100.02	-	-	-	-	339	684	364	32	475	25	1070	75	169	-	-	-	-	-	-	-	-	-	-	-	-	-	-	-
Conticelli et al. 1992	Italy	Tuscan M.P.	Montecatini	LMP	MVC122a	Pliocene	4.1	11	55.88	1.52	12.23	4.1	2.6	3.29	0.09	7.48	7.83	1	1.32	2.66	100	19.9	121	425	31	159	712	434	31	521	35	1250	83	215	-	131	23	3.72	-	1.4	-	-	-	-	1.88	0.29	14	2	-
Conticelli et al. 1992	Italy	Tuscan M.P.	Montecatini	LMP	MVC134a	Pliocene	4.1	11	56.34	1.44	12.28	3.76	2.4	3.34	0.08	7.42	7.79	1.13	1.16	2.86	100	-	-	-	-	142	731	437	35	522	36	1190	66	185	-	-	-	-	-	-	-	-	-	-	-	-	-	-	-
Conticelli et al. 1992; Prelević et al. 2010	Italy	Tuscan M.P.	Montecatini	LMP	MVC126	Pliocene	4.1	11	56.92	1.2	12.41	3.73	2.28	3.44	0.08	7.27	7.76	1.05	1.13	2.45	99.72	17.4	116.1	373.6	-	128.2	599.8	314.6	19.6	344.4	26.2	918.7	53.71	125.27	21.45	99.59	17.7	2.75	8.73	-	4.32	-	1.77	-	1.58	0.22	9.49	1.41	38.7
Conticelli et al. 1992	Italy	Tuscan M.P.	Montecatini	LMP	MVC101	Pliocene	4.1	11	56.51	1.3	12.05	3.51	2.88	3.64	0.08	7.51	7.76	1.24	1.25	2.26	99.99	-	-	-	-	153	750	414	30	520	35	1220	74	175	-	-	-	-	-	-	-	-	-	-	-	-	-	-	-
Conticelli et al. 1992	Italy	Tuscan M.P.	Montecatini	LMP	MVC108	Pliocene	4.1	11	56.69	1.42	12.15	3.57	3	3.54	0.09	7.25	7.72	1.28	1.2	2.08	99.99	-	-	-	-	153	747	432	32	508	33	1230	61	168	-	-	-	-	-	-	-	-	-	-	-	-	-	-	-
Conticelli et al. 1992	Italy	Tuscan M.P.	Montecatini	LMP	MVC149	Pliocene	4.1	11	58.02	1.33	11.74	3.46	2.54	2.99	0.07	7.45	7.54	1.35	1.1	2.4	99.99	-	-	-	-	141	742	388	33	487	26	1160	74	161	-	-	-	-	-	-	-	-	-	-	-	-	-	-	-
Conticelli et al. 1992	Italy	Tuscan M.P.	Montecatini	LMP	MVC151	Pliocene	4.1	11	62.04	0.95	13.3	2.45	2.08	2.17	0.06	4.24	8.91	1.82	0.6	1.36	99.98	-	-	-	-	92	874	362	38	641	32	760	60	142	-	-	-	-	-	-	-	-	-	-	-	-	-	-	-
Conticelli et al. 1992	Italy	Tuscan M.P.	Montecatini	LMP	MVC124	Pliocene	4.1	11	64.45	0.89	14.36	2.37	1.09	1.41	0.06	3.15	9.73	1.69	0.36	0.49	100.05	8.1	63	105	9.5	52	977	451	39	698	37	690	60	145	-	125	13.4	2.15	-	0.8	-	-	-	-	1.38	0.27	15	2.4	-
Conticelli et al. 1992	Italy	Tuscan M.P.	Montecatini	LMP	MVC110	Pliocene	4.1	11	64.49	0.69	14.75	1.95	1.04	1.39	0.05	2.01	10.32	1.91	0.25	1.15	100	-	-	-	-	46	882	528	31	625	33	625	42	107	-	-	-	-	-	-	-	-	-	-	-	-	-	-	-
Conticelli et al. 1992	Italy	Tuscan M.P.	Montecatini	LMP	MVC137	Pliocene	4.1	11	65.61	0.5	15.11	1.51	0.7	1.16	0.03	1.79	10.41	1.89	0.22	1.08	100.01	-	-	-	-	36	938	497	30	546	32	419	44	90	-	-	-	-	-	-	-	-	-	-	-	-	-	-	-
Conticelli et al. 1992	Italy	Tuscan M.P.	Montecatini	LMP	MVC134b	Pliocene	4.1	11	66.65	0.75	13.63	2.45	0.8	1.39	0.05	2.05	8.71	1.63	0.2	1.68	99.99	-	-	-	-	33	832	354	32	673	34	480	56	162	-	-	-	-	-	-	-	-	-	-	-	-	-	-	-
Conticelli et al. 1992	Italy	Tuscan M.P.	Montecatini	LMP	MVC122b	Pliocene	4.1	11	67.15	0.63	13.94	2.48	0.72	1.05	0.04	2.02	8.74	1.66	0.21	1.35	99.99	-	-	-	-	40	918	348	30	726	36	320	60	147	-	-	-	-	-	-	-	-	-	-	-	-	-	-	-
Conticelli et al. 1992	Italy	Tuscan M.P.	Montecatini	LMP	MVC148	Pliocene	4.1	11	67.98	0.56	14.98	1.54	0.76	0.62	0.05	0.96	9.82	1.82	0.2	0.8	100.09	-	-	-	-	19	1005	263	34	802	43	163	62	145	-	-	-	-	-	-	-	-	-	-	-	-	-	-	-
Conticelli et al. 1992	Italy	Tuscan M.P.	Montecatini	LMP	MVC112	Pliocene	4.1	11	68.49	0.48	15.2	0.63	0.84	0.52	0.02	0.78	10.44	2.08	0.1	0.41	99.99	-	-	-	-	22	931	364	28	685	41	295	52	113	-	-	-	-	-	-	-	-	-	-	-	-	-	-	-
Conticelli 1998	Italy	Tuscan M.P.	TorreAlfina	LMP	VS 90	Pleistocene	0.88	11	56.62	1.24	14.58	0.22	5.12	4.48	0.08	8.42	7.16	0.99	0.56	0.53	100	-	119	605	-	303	425	674	34	606	33	1250	95	251	-	-	-	-	-	-	-	-	-	-	-	-	-	-	-
Conticelli 1998	Italy	Tuscan M.P.	TorreAlfina	LMP	VS 91	Pleistocene	0.88	11	56.69	1.23	14.39	0.37	4.92	5.13	0.09	8.01	7.07	1.01	0.49	0.59	99.99	-	123	672	-	299	430	604	32	537	32	1221	97	240	-	-	-	-	-	-	-	-	-	-	-	-	-	-	-
Conticelli 1998	Italy	Tuscan M.P.	TorreAlfina	LMP	VS 75e	Pleistocene	0.88	11	56.79	1.26	14.25	0.71	4.8	4.57	0.08	8.52	6.96	0.95	0.52	0.59	100	-	-	551	-	288	388	686	37	584	34	1165	92	225	-	-	-	-	-	-	-	-	-	-	-	-	-	-	-
Conticelli 1998	Italy	Tuscan M.P.	TorreAlfina	LMP	VS 75m	Pleistocene	0.88	11	56.8	1.25	14.16	0.55	4.8	4.39	0.08	8.85	6.95	0.97	0.54	0.65	99.99	-	-	535	-	286	384	671	40	591	35	1150	89	230	-	-	-	-	-	-	-	-	-	-	-	-	-	-	-
Conticelli 1998	Italy	Tuscan M.P.	TorreAlfina	LMP	VS 70	Pleistocene	0.88	11	56.81	1.28	14.36	0.51	4.91	4.48	0.09	8.36	7.05	1.21	0.52	0.42	100	17.2	127	626	33	291	419	660	34	642	36	1195	100	241	-	123	19.7	3.45	-	1.36	-	-	-	-	2.8	0.35	16.5	2.2	50
Conticelli et al. 2011; Casalini et al. 2019	Italy	Tuscan M.P.	Radicofani	HK-SHO	VS 184	Pleistocene	1.303	12	56.36	1.17	14.91	1.26	4.25	5.37	0.11	9.48	4.96	1.44	0.29	0.41	100.01	20.4	131	494	35.7	267	379	391	27	495	26.3	839	76.989	178.992	21.7056	88.02	15.204	2.3322	6.2001	0.96115	4.991	1.0366	2.604	0.3597	1.9	0.2924	12.2	1.79	43
Conticelli et al. 2011; Casalini et al. 2019	Italy	Tuscan M.P.	Radicofani	HK-SHO	VS 114	Pleistocene	1.35	12	55.78	0.99	15.07	5.62	0.23	6.12	0.1	9.09	4.65	1.78	0.28	0.42	100.13	23.2	145	483	33.1	202	369	366	24	420	21.8	713	69.996	151.008	19.3376	80.02	13.6926	2.208	6.2499	0.9588	5.0964	1.0147	2.73	0.3432	1.8	0.2992	10.7	1.62	39
Conticelli et al. 2011	Italy	Tuscan M.P.	Radicofani	HK-SHO	VS 182	Pleistocene	1.303	12	56.27	1.11	15.25	1.6	3.65	5.82	0.1	8.85	4.83	1.56	0.3	0.66	100	20.7	135	481	31.3	224	369	379	26	443	23.2	831	75.999	165	19.5888	82.02	15.0954	2.3596	6.0427	1.0502	4.952	1.01534	2.5108	0.34026	1.76	0.3046	11.4	1.7	49
Conticelli et al. 2011	Italy	Tuscan M.P.	Radicofani	HK-SHO	VS 154	Pleistocene	1.35	12	55.79	1.1	14.99	5.46	0.9	5.43	0.11	9.36	4.63	1.57	0.28	0.38	100	22.7	138	496	-	191	355	362	27	395	20	809	-	-	-	-	-	-	-	-	-	-	-	-	-	-	-	-	33
Conticelli et al. 2011	Italy	Tuscan M.P.	Radicofani	HK-SHO	VS 117	Pleistocene	1.35	12	55.93	1.02	15.26	4.02	1.59	6.2	0.1	8.59	4.75	1.62	0.28	0.66	100.02	21.9	-	485	34	217	371	373	26	426	22	746	69.003	157.96	19.4432	78	13.1949	2.139	6.7479	1.0152	5.208	0.9928	2.73	0.3564	1.86	0.2822	10.4	1.51	44
Conticelli et al. 2011	Italy	Tuscan M.P.	Radicofani	HK-SHO	VS 153	Pleistocene	1.35	12	55.45	1	15.76	4.42	1.49	6.12	0.1	8.5	4.65	1.55	0.27	0.69	100	21	139	471	-	213	351	366	27	422	21	691	-	-	-	-	-	-	-	-	-	-	-	-	-	-	-	-	38
Conticelli 1998	Italy	Tuscan M.P.	TorreAlfina	SHO	VS 31	Pleistocene	0.88	12	57.29	1.31	14.89	2.82	3.48	4.72	0.09	7.56	5.77	0.87	0.35	0.83	99.98	-	131	451	-	254	324	591	36	565	33	1109	85	196	-	-	-	-	-	-	-	-	-	-	-	-	-	-	-
Conticelli 1998	Italy	Tuscan M.P.	TorreAlfina	SHO	VS 30	Pleistocene	0.88	12	57.6	1.25	14.89	0.37	5.4	4.5	0.09	7.38	5.92	1.15	0.46	0.98	99.99	-	142	455	-	259	328	606	35	581	31	1145	89	212	-	-	-	-	-	-	-	-	-	-	-	-	-	-	-
Conticelli 1998	Italy	Tuscan M.P.	TorreAlfina	SHO	VS 79	Pleistocene	0.88	12	57.69	1.29	15.11	1.01	5.04	4.53	0.1	7.39	6.15	0.95	0.5	0.24	100	-	131	431	-	268	341	581	32	582	32	1101	89	205	-	-	-	-	-	-	-	-	-	-	-	-	-	-	-
Conticelli 1998	Italy	Tuscan M.P.	TorreAlfina	SHO	VS 25	Pleistocene	0.88	12	57.81	1.22	14.96	0.41	5.6	4.54	0.1	7.26	6.16	1.34	0.4	0.2	100	-	133	435	-	245	341	599	36	599	33	1071	87	209	-	-	-	-	-	-	-	-	-	-	-	-	-	-	-
Conticelli 1998	Italy	Tuscan M.P.	TorreAlfina	SHO	VS 37	Pleistocene	0.88	12	58.24	1.2	14.91	0.36	5.56	4.41	0.1	7.11	5.58	1.26	0.39	0.89	100.01	17	128	416	30	262	351	520	35	550	28	1080	89	213	-	102	19.6	2.83	-	1.07	-	-	-	-	2.74	0.48	13.7	1.7	-
Conticelli 1998; Conticelli et al. 2002	Italy	Tuscan M.P.	TorreAlfina	SHO	VS 27	Pleistocene	0.88	12	57.67	1.21	14.94	0.1	5.54	4.36	0.1	7.52	5.9	1.15	0.46	1.07	100.02	17	131	457	32	250	334	565	35	572	32	1089	88	200	-	93	19.2	2.69	-	1.03	-	-	-	-	2.79	0.39	13.1	1.7	-
Conticelli et al. 2002	Italy	Tuscan M.P.	Radicofani	SHO	C.77.6	Pleistocene	1.01	12	60.2428	0.749911	15.7981	1.61981	3.16	5.43935	0.0899893	4.5	5.36	2.14	0.309963	0.59	100	18	117	204	-	59	353	613	-	362	-	883	91	196	-	82	11.8	2.26	-	1.2	-	-	-	-	2.81	0.38	10	1.8	-
Conticelli et al. 2002	Italy	Tuscan M.P.	Radicofani	SHO	C.77.16	Pleistocene	0.94	12	57.2911	0.847945	15.9513	1.21705	3.86	6.80351	0.0897824	6.3	5.01	1.81	0.30925	0.51	100	21	137	302	-	108	336	688	-	366	-	1061	94	196	-	85	11.8	2.4	-	1	-	-	-	-	2.26	0.36	9.7	1.6	-
Conticelli et al. 2002, 2007, 2009	Italy	Tuscan M.P.	Radicofani	SHO	VS 159	Pleistocene	0.94	12	56.9428	1.09659	15.3921	1.01684	3.92	5.50287	0.0996897	7.65	5.77	1.33	0.269162	1.01	100	-	102.7	389.8	25.9283	154.1	381.8	408.8	23.1	429.1	24.276	756.3	93.1	192.5	-	85	15.9	2.32	-	1.1	-	-	-	-	1.96	0.34	10.9	1.9	49.2
Conticelli et al. 2002, 2009	Italy	Tuscan M.P.	Radicofani	SHO	VS 204	Pleistocene	0.94	12	54.1101	1.00628	15.9112	0.916614	4.5	6.18715	0.0896688	8.82	5.84	1.42	0.288933	0.91	100	20.39	115	490	29	243	353	506	29	415	30.94	918	95	186	-	88	17.72	2.487	-	0.974	-	-	-	-	2.086	0.349	11.261	2.126	54
Conticelli et al. 2009	Italy	Tuscan M.P.	Radicofani	SHO	VS 200	Pleistocene	1.01	12	60.3544	0.817081	15.5046	1.56441	3.28	5.39074	0.0896796	4.41	5.62	2.1	0.24911	0.62	100	17.5	111	164	17	65	337	588	25	302	16	947	98	202	-	75	14.8	2.32	-	1.3	-	-	-	-	3	0.45	8.9	2	66
Conticelli et al. 2009	Italy	Tuscan M.P.	Radicofani	SHO	VS 148	Pleistocene	0.94	12	57.5571	0.940115	15.3319	1.89023	3.11	5.43067	0.110013	7.49	5.45	1.98	0.290036	0.42	100	18.2	112	422	28	149	375	669	27	375	21.42	998	99	205	-	87	15.1	2.19	-	1.28	-	-	-	-	2.3	0.4	9.4	2.08	81.7
Conticelli et al. 2009	Italy	Tuscan M.P.	Radicofani	SHO	VS 202	Pleistocene	0.94	12	52.8889	1.18706	14.7235	5.02754	1.2	6.50388	0.0997528	9.58	5.89	1.15	0.279308	1.47	100	19.4	111	651	36	230	345	454	19.4	473	27.1	896	99.6	229	28.1	105	16.5	2.91	9.75	1.01	4.68	0.81	2.22	0.307	1.79	0.258	14.3	2.05	45
Conticelli et al. 2011	Italy	Tuscan M.P.	Radicofani	SHO	VS 111	Pleistocene	1.303	12	55.95	1.05	15.4	1.61	3.94	6.06	0.09	8.8	4.78	1.76	0.28	0.27	99.99	19.3	-	474	-	215	372	375	25	432	22	756	-	-	-	-	-	-	-	-	-	-	-	-	-	-	-	-	48
Conticelli et al. 2011	Italy	Tuscan M.P.	Radicofani	SHO	VS 110	Pleistocene	1.303	12	55.78	1.03	15.37	2.3	3.43	6.37	0.09	8.58	4.53	1.61	0.25	0.56	99.9	21.5	141	480	-	195	347	362	23	406	21	711	-	-	-	-	-	-	-	-	-	-	-	-	-	-	-	-	40
Conticelli et al. 2011	Italy	Tuscan M.P.	Radicofani	SHO	VS 112	Pleistocene	1.303	12	55.37	0.99	15.95	1.59	4.35	6.99	0.1	8.26	4.12	1.68	0.24	0.36	100	23.5	151	494	36	183	306	356	27	354	18	678	60.984	131.016	16.312	63.78	10.43	1.9389	5.727	0.8413	4.898	1.0147	2.562	0.3564	1.9	0.3012	8.9	1.43	38
Conticelli et al. 2011	Italy	Tuscan M.P.	Radicofani	SHO	VS 107	Pleistocene	1.303	12	55.28	0.95	16.33	1.22	4.48	7.43	0.11	8.07	3.65	1.82	0.23	0.43	100	25.8	-	485	-	174	299	351	24	316	18	-	-	-	-	-	-	-	-	-	-	-	-	-	-	-	-	-	37
Conticelli et al. 2011	Italy	Tuscan M.P.	Radicofani	SHO	VS 108	Pleistocene	1.303	12	55.12	0.94	16.47	1.22	4.43	7.39	0.11	8.18	3.58	1.89	0.24	0.44	100.01	25.3	154	480	-	161	273	351	26	305	17	668	-	-	-	-	-	-	-	-	-	-	-	-	-	-	-	-	38
Conticelli et al. 2011	Italy	Tuscan M.P.	Radicofani	SHO	VS 106	Pleistocene	1.303	12	54.99	0.96	16.11	1.86	4.15	6.86	0.1	8.32	3.87	2	0.23	0.55	100	24.7	150	481	39	181	297	354	23	389	18.1	691	59.994	132.968	15.7024	64.98	10.5931	2.0493	6.9471	0.9494	5.084	0.9636	2.835	0.3564	1.96	0.2788	9	1.44	37
Conticelli et al. 2011	Italy	Tuscan M.P.	Radicofani	SHO	VS 109	Pleistocene	1.303	12	54.18	0.87	16.72	2.22	4.07	7.35	0.11	7.6	3.43	2.07	0.21	1.17	100	25.1	168	459	-	160	256	343	24	262	16	652	-	-	-	-	-	-	-	-	-	-	-	-	-	-	-	-	32
Conticelli et al. 2011	Italy	Tuscan M.P.	Radicofani	SHO	VS 129	Pleistocene	1.303	12	54.29	0.85	17.39	1.68	4.44	7.6	0.11	7.82	3.09	2.05	0.22	0.46	100	24.5	184	399	24.7	135	193	335	24	208	14.1	635	46.992	104.016	11.816	46.98	7.0771	1.7595	5.5527	0.7802	4.495	0.9271	2.331	0.3201	2.1	0.3468	6.3	0.97	27
Conticelli et al. 2011	Italy	Tuscan M.P.	Radicofani	SHO	VS 118	Pleistocene	1.35	12	55.27	0.97	15.84	2.09	3.95	7.06	0.1	8.35	4.02	1.68	0.22	0.45	100	24.4	153	488	-	187	297	354	26	350	19	671	-	-	-	-	-	-	-	-	-	-	-	-	-	-	-	-	36
Conticelli et al. 2011	Italy	Tuscan M.P.	Radicofani	SHO	VS 155	Pleistocene	1.35	12	54.96	0.95	15.78	5.97	0.72	7.15	0.11	7.95	3.77	1.75	0.22	0.67	100	25.7	161	479	-	164	297	362	26	345	19	675	-	-	-	-	-	-	-	-	-	-	-	-	-	-	-	-	35
Conticelli et al. 2011	Italy	Tuscan M.P.	Radicofani	SHO	VS 119	Pleistocene	1.35	12	54.81	0.89	16.07	1.52	4.52	7.26	0.11	8.27	3.92	1.92	0.23	0.48	100	25.7	159	454	-	164	282	341	25	290	17	642	-	-	-	-	-	-	-	-	-	-	-	-	-	-	-	-	31
Conticelli et al. 2011	Italy	Tuscan M.P.	Radicofani	SHO	VS 113	Pleistocene	1.35	12	54.69	0.85	16.35	2.15	4.01	7.6	0.11	7.98	3.8	1.82	0.21	0.42	99.99	27	170	461	-	152	285	340	25	293	18	634	-	-	-	-	-	-	-	-	-	-	-	-	-	-	-	-	22
Conticelli et al. 2011	Italy	Tuscan M.P.	Radicofani	SHO	VS 150	Pleistocene	1.35	12	54.51	1.01	16.16	2.8	3.93	7.19	0.11	8.03	3.59	1.78	0.24	0.58	99.93	26.2	167	458	30	151	224	341	27	277	16.2	681	56.298	125.992	17.0352	67.02	10.8962	2.001	5.8266	0.8695	4.929	0.9563	2.625	0.363	2.16	0.34	7.9	1.1	31
Conticelli et al. 2011	Italy	Tuscan M.P.	Radicofani	SHO	VS 152	Pleistocene	1.35	12	54.84	0.93	16.64	1.26	4.81	7.6	0.11	7.83	3.41	1.93	0.21	0.44	100.01	25	157	453	-	146	251	343	24	265	16	673	-	-	-	-	-	-	-	-	-	-	-	-	-	-	-	-	28
Conticelli et al. 2011	Italy	Tuscan M.P.	Radicofani	SHO	VS 127	Pleistocene	1.35	12	54.55	0.93	16.85	2.67	3.63	7.41	0.11	7.87	3.133	1.98	0.23	0.63	99.993	25.6	168	418	-	153	215	351	24	225	15	667	-	-	-	-	-	-	-	-	-	-	-	-	-	-	-	-	32
Conticelli et al. 2011	Italy	Tuscan M.P.	Radicofani	SHO	VS 122	Pleistocene	1.35	12	54.5	0.89	16.97	0.93	5.07	7.54	0.11	8.09	3.26	1.95	0.2	0.49	100	26.2	170	409	25.2	137	214	343	24	211	14.5	666	49.5	111	13.5	50	8.3	1.83	6.1	0.82	4.7	0.95	2.51	0.351	2.1	0.36	6.6	1	32
Conticelli et al. 2011	Italy	Tuscan M.P.	Radicofani	SHO	VS 126	Pleistocene	1.35	12	54.47	0.91	16.95	1.43	4.5	7.61	0.11	8.12	3.23	2.16	0.2	0.32	100.01	26.2	168	423	-	-	228	347	22	249	16	-	-	-	-	-	-	-	-	-	-	-	-	-	-	-	-	-	29
Conticelli et al. 2011	Italy	Tuscan M.P.	Radicofani	SHO	VS 121	Pleistocene	1.35	12	54.24	0.9	16.81	1.24	4.69	7.56	0.11	8.18	3.3	2.07	0.2	0.69	99.99	26.8	-	419	-	128	212	342	25	219	15	655	-	-	-	-	-	-	-	-	-	-	-	-	-	-	-	-	23
Conticelli et al. 2013	Italy	Tuscan M.P.	Radicofani	SHO	VS 166	Pleistocene	1.01	12	60.4977	0.84647	15.4755	1.43402	3.4	5.29791	0.0995847	4.64	5.52	2.05	0.278837	0.46	100	-	100	181	21.2141	55.7	354.3	572.5	22.3	284.7	13.7	965.9	93	179.1	-	-	-	-	-	-	-	-	-	-	-	-	-	-	85
Conticelli et al. 2013	Italy	Tuscan M.P.	Radicofani	SHO	VS 169	Pleistocene	1.01	12	60.6284	0.914609	15.0811	1.4415	3.25	5.23621	0.0894726	4.32	5.48	1.98	0.218711	1.36	100	-	86.2	203.1	17.4427	58.8	363	531	22.5	281	16.8	992	85.3	170.4	-	-	-	-	-	-	-	-	-	-	-	-	-	-	66.4
Conticelli et al. 2013	Italy	Tuscan M.P.	Radicofani	SHO	VS 168	Pleistocene	1.01	12	60.62	0.777234	15.51	1.67	3.24	5.3111	0.0996454	4.21	5.58	1.99	0.298936	0.68	99.9869	-	114.6	173.3	16.9713	52.8	362.4	583.8	24.4	319	18.1	971.3	93.9	178.8	-	-	-	-	-	-	-	-	-	-	-	-	-	-	72.4
Conticelli et al. 2013	Italy	Tuscan M.P.	Radicofani	SHO	VS 146	Pleistocene	1.01	12	59.89	0.78	15.56	2.09	2.75	6.03	0.1	4.4	5.22	2.24	0.22	0.72	100	16	89.6	151.4	19	53	360.9	603	23.3	350	15	880.6	86	186	-	72	13.8	2.28	-	1.1	-	-	-	-	2.8	0.42	9.1	1.95	67
Conticelli et al. 2013	Italy	Tuscan M.P.	Radicofani	SHO	VS 201	Pleistocene	1.01	12	59.76	0.737855	15.7437	1.45562	3.44	5.93	0.0997101	4.74	5.25	2.16	0.279188	0.4	99.996	-	110	159	21	70	352	627	24	314	15	886	82	189	-	79	-	-	-	-	-	-	-	-	-	-	-	-	68
Conticelli et al. 2013	Italy	Tuscan M.P.	Radicofani	SHO	VS 162	Pleistocene	0.94	12	56.31	1.01585	16.027	1.56361	3.8	6.03535	0.109553	6.73	5.28	1.7	0.348577	1.08	100	-	121.5	379.7	29.1104	131.1	343.3	704.4	25.3	371.2	20.825	1168.7	111	250.3	-	-	-	-	-	-	-	-	-	-	-	-	-	-	89
Conticelli et al. 2013	Italy	Tuscan M.P.	Radicofani	SHO	VS 164	Pleistocene	0.94	12	55.7708	1.00565	16.1401	2.08099	3.24	5.87457	0.109526	7.12	5.39	1.6	0.388319	1.27	99.99	19.9	121.8	373.4	28	137.2	333.3	741.6	25.4	370.5	20.23	1149.4	115	249	-	97	17.4	2.99	-	1.22	-	-	-	-	2.1	0.36	10.3	1.95	83.9
Conticelli et al. 2013	Italy	Tuscan M.P.	Radicofani	SHO	VS 132	Pleistocene	0.94	12	57.85	1.03	15.45	1.27	3.58	5.59	0.0999976	6.85	5.59	1.612	0.279993	0.79	99.992	-	116.3	392	22.7462	145	382	467	26	404	24.514	832	101	198.8	-	-	-	-	-	-	-	-	-	-	-	-	-	-	61
Conticelli et al. 2013	Italy	Tuscan M.P.	Radicofani	SHO	VS170	Pleistocene	0.94	12	57.7209	0.995702	15.5827	0.866261	3.88	5.54606	0.0896132	6.89	5.55	1.64	0.288754	0.95	100	18.5	124	452	25.2	151	436	456	28.3	379.9	25.823	757.8	87	172	-	80	14.9	2.53	-	0.97	-	-	-	-	2.2	0.34	11.2	2	59.3
Conticelli et al. 2013	Italy	Tuscan M.P.	Radicofani	SHO	VS 172	Pleistocene	0.94	12	57.2939	0.99434	14.8157	1.44179	3.68	5.85666	0.109377	7.59	5.6	1.51	0.298302	0.81	100	-	110	460.4	27.2247	161.2	409.6	491.2	28.1	394.3	24.514	898.5	92.9	178	-	-	-	-	-	-	-	-	-	-	-	-	-	-	52.5
Conticelli et al. 2013	Italy	Tuscan M.P.	Radicofani	SHO	VS 147	Pleistocene	0.94	12	56.987	0.968928	15.1632	2.02776	3.08	5.81357	0.0998895	7.61	5.36	1.81	0.28968	0.79	100	20.6	114.2	441.9	28	155.4	398	711	28	373	22.61	902	94	199	-	94	15.6	2.29	-	1.08	-	-	-	-	2.4	0.6	10.6	1.82	68.6
Conticelli et al. 2013	Italy	Tuscan M.P.	Radicofani	SHO	VS 174	Pleistocene	0.94	12	56.177	0.958583	15.3873	1.78736	3.64	5.84042	0.109838	7.64	5.46	1.77	0.289572	0.94	100	-	130.3	394.6	28	139.9	378	692	29	352	23.8	967.7	88.5	174.2	-	-	-	-	-	-	-	-	-	-	-	-	-	-	48.9
Conticelli et al. 2013	Italy	Tuscan M.P.	Radicofani	SHO	VS 173	Pleistocene	0.94	12	55.4627	0.943919	16.0864	2.25547	3	5.87409	0.109296	7.88	5.29	1.87	0.278208	0.95	100	20.7	135.9	425.2	27	162.7	353	695	26	369	22.61	1042.8	105	190	-	84	15.6	2.45	-	0.97	-	-	-	-	1.9	0.33	10.1	1.91	51.1
Conticelli et al. 2013	Italy	Tuscan M.P.	Radicofani	SHO	VS 167	Pleistocene	0.94	12	57.8191	1.13427	14.5068	1.45267	3.44	5.5191	0.0994976	7.26	5.92	1.35	0.268644	1.13	99.9	16.4	113.8	460.1	22.5	158.9	439.1	419.3	23	451.1	27.846	724.3	85	187	-	82	15.8	2.24	-	1.1	-	-	-	-	1.9	0.35	11.8	1.99	41.6
Conticelli et al. 2013	Italy	Tuscan M.P.	Radicofani	SHO	VS 157	Pleistocene	0.94	12	57.194	1.13591	14.8764	1.17577	4	5.77919	0.0996412	7.65	5.78	1.35	0.269031	0.69	100	-	96.7	399	28.9926	164.7	394.6	416.9	23.3	452.6	27.965	736.2	88.5	190.1	-	-	-	-	-	-	-	-	-	-	-	-	-	-	40.8
Conticelli et al. 2013	Italy	Tuscan M.P.	Radicofani	SHO	VS 179	Pleistocene	0.94	12	55.21	1.02	15.95	1.57025	3.44	6.22	0.0993826	8.36	5.75	1.4	0.248457	0.72	99.9881	-	120.9	481	26	194.4	324	503.5	24.8	419.7	27.251	938.5	90.4	189	-	-	-	-	-	-	-	-	-	-	-	-	-	-	63.4
Conticelli et al. 2013	Italy	Tuscan M.P.	Radicofani	SHO	VS 171	Pleistocene	0.94	12	54.0928	1.04082	16.1674	1.36793	4.04	6.27465	0.109038	8.4	5.64	1.47	0.297377	1.1	100	20.9	113	500.5	24.1	174.4	328	505	26.4	403.3	26.18	979.7	94	197	-	91	17.2	2.61	-	0.97	-	-	-	-	2.2	0.33	11.9	2	57.2
Perini et al. 2003	Italy	Tuscan M.P.	Radicofani	SHO	VS 203	Pleistocene	1.01	12	59.4941	0.776338	17.4629	2.42855	2.44	4.42958	0.0796245	3.32	5.45	2.19	0.238873	1.59	99.9	14.1	87	81	15	41	302	617	26	275	15	951	101	190	-	71	15.2	2.14	-	1.3	-	-	-	-	2.6	0.43	8.1	2.03	97
Perini et al. 2003	Italy	Tuscan M.P.	Radicofani	SHO	VS 238	Pleistocene	0.94	12	57.51	1	15.2	1.15	3.78	5.7	0.1	7.19	5.58	1.78	0.29	0.8	100.08	-	126	420	27	151	393	674	26	378	22.61	938	91	176	-	-	-	-	-	-	-	-	-	-	-	-	-	-	56
Perini et al. 2003	Italy	Tuscan M.P.	Radicofani	SHO	VS 212	Pleistocene	0.94	12	56.7387	0.962309	15.4337	1.82216	3.322	5.79975	0.105807	7.536	5.408	1.79	0.287499	0.796	100.002	18.3	123.68	420.74	26.6907	151.6	379.4	678.2	20.1	369.4	23.1	989.7	93.9	181.84	-	-	-	-	-	-	-	-	-	-	-	-	-	-	61.26
Perini et al. 2003	Italy	Tuscan M.P.	Radicofani	SHO	VS 156	Pleistocene	0.94	12	57.3804	1.0834	14.6507	1.28219	3.72	5.67542	0.0993945	7.56	5.79	1.34	0.258426	1.16	100	-	99.7	431.5	25.6926	168.3	383.2	408.6	22.9	417.7	23.324	734.1	89.3	179	-	-	-	-	-	-	-	-	-	-	-	-	-	-	57.4
Conticelli et al. 2011	Italy	Tuscan M.P.	Radicofani	HKCA	VS 221	Pleistocene	1.35	13	54.34	0.91	17.21	0.08	5.99	7.59	0.11	7.77	2.89	2.02	0.25	0.84	100	-	173	417	29.4	124	168	339	22.6	216	11.7	579	41.4	92.6	11.1	43.6	7.66	1.75	5.81	0.81	4.16	0.75	2.12	0.31	1.97	0.32	5.48	0.95	29
Conticelli et al. 2011	Italy	Tuscan M.P.	Radicofani	HKCA	VS 124	Pleistocene	1.35	13	54.2	0.89	16.74	2.58	3.8	7.93	0.11	7.8	2.88	2.18	0.2	0.69	100	24.7	-	373	-	109	188	323	26	225	13	592	-	-	-	-	-	-	-	-	-	-	-	-	-	-	-	-	20
Conticelli et al. 2011	Italy	Tuscan M.P.	Radicofani	HKCA	VS 151	Pleistocene	1.35	13	53.675	0.87	17.01	2.97	4.11	7.58	0.11	7.97	3.02	2.23	0.22	0.53	100.295	23.9	176	392	29.1	107	201	335	23	215	12.9	625	46.002	104.198	12.208	43.98	7.2219	1.7388	5.2041	0.7849	4.402	0.9198	2.3121	0.3267	1.94	0.3094	7.2	1	21
Conticelli et al. 2011	Italy	Tuscan M.P.	Radicofani	HKCA	VS 123	Pleistocene	1.35	13	53.64	0.89	16.96	2.63	3.84	7.84	0.11	7.82	2.95	2.32	0.2	0.8	100	24.1	195	380	27	97	161	325	21.6	197	11.3	612	47.8	103	12.5	47.1	7.87	1.85	6.2	0.86	4.48	0.87	2.48	0.345	2.15	0.316	6.5	0.99	20
Prelević et al. 2005	Serbia	Vardar Zone	Arandjelovac	LMP	Ar99/2	Oligocene/Mio-Pliocene		14	42.4	0.79	10.21	7.57	-	9.54	-	10.05	3.06	1.28	0.96	11.07	96.93	26	159	824	42	275	148	516	25	202	12	1276	28.7	60	-	32	6.5	2	-	0.7	-	-	-	-	1.6	-	4.5	-	33
Prelević et al. 2005	Serbia	Vardar Zone	Arandjelovac	LMP	Ar99	Oligocene/Mio-Pliocene		14	46.9	0.87	11.12	8.45	-	8.56	-	11.81	4.43	2.03	1.11	4.82	100.1	-	185	868	43	260	193	711	33	208	11	1647	35	48	-	49	-	-	-	-	-	-	-	-	-	-	-	-	18
Prelević et al. 2005	Serbia	Vardar Zone	Arandjelovac	LMP	Ar96/1	Oligocene/Mio-Pliocene		14	46.5	0.83	10.78	8.37	-	7.74	-	13.36	5.66	0.81	1.08	3.94	99.07	-	182	1176	48	299	218	783	29	195	10	2437	32	80	-	46	-	-	-	-	-	-	-	-	-	-	-	-	22
Prelević et al. 2005	Serbia	Vardar Zone	Arandjelovac	LMP	Ar96/2	Oligocene/Mio-Pliocene		14	43.3	0.8	10.62	7.86	-	9.85	-	10.3	3.15	1.09	0.99	11.79	99.75	-	179	925	58	298	153	521	22	201	11	1316	25	52	-	43	-	-	-	-	-	-	-	-	-	-	-	-	32
Prelević et al. 2005	Serbia	Vardar Zone	Arandjelovac	LMP	Ar99/4	Oligocene/Mio-Pliocene		14	44.4	0.81	10.28	9.33	-	8.18	-	12.6	5.93	0.39	1.02	6.25	99.19	28	188	1124	53	392	236	516	29	197	11	2634	33.3	68.6	-	36.3	7.5	3.1	-	0.9	-	-	-	-	1.7	-	5.2	-	7
Prelević et al. 2005	Serbia	Vardar Zone	Arandjelovac	LMP	Ar96/4	Oligocene/Mio-Pliocene		14	45.7	0.84	10.89	8.36	-	8.32	-	11.06	5.7	0.76	1.04	6.71	99.38	-	187	1038	44	329	240	587	30	214	13	2986	23	69	-	35	-	-	-	-	-	-	-	-	-	-	-	-	16
Prelević et al. 2005	Serbia	Vardar Zone	Avala	LMP	AV00/5	Oligocene	22	15	49	1.51	15.27	8.91	-	8.61	0.13	5.38	4.48	2.38	0.65	3.31	99.63	22	159	130	19	78	243	820	35	254	52	1205	73.8	136.5	15.8	59.6	11.1	3.2	9.3	1.3	6.1	1.1	2.8	0.4	2.4	0.4	5.5	-	59
Prelević et al. 2005	Serbia	Vardar Zone	Avala	LMP	AV-1	Oligocene	30.9	14	56.5	1.39	12.9	5.44	-	3.92	0.09	5.98	7.45	1.81	0.45	3.5	99.43	19	126	354	21	128	556	432	22	490	22	1008	73.3	191	25.3	104	17.2	3	9.7	1.3	4.7	0.8	1.9	0.3	1.7	0.2	13.1	-	30
Prelević et al. 2005	Serbia	Vardar Zone	Avala	LMP	AV97/2	Oligocene	30.9	14	55.8	1.33	12.55	5.23	-	4.34	0.09	5.36	7.21	1.47	0.44	4.72	98.54	18	114	325	22	85	544	482	20	612	31	931	58.2	145.8	19.4	81.2	13.3	2.3	8	1	3.9	0.7	1.5	0.2	1.5	0.2	10.5	-	27
Prelević et al. 2005	Serbia	Vardar Zone	Avala	LMP	AV 1-2	Oligocene	30.9	14	56	1.4	13.08	5.58	-	3.88	0.09	5.79	6.96	1.92	0.45	4.21	99.36	18	114	439	22	90	1020	421	20	671	33	844	56	141	19.8	82.5	14.5	2.2	8.8	1	4.2	0.7	1.9	0.3	1.5	0.2	13	-	26
Prelević et al. 2005	Serbia	Vardar Zone	Avala	LMP	AV 1-5	Oligocene	30.9	14	56.5	1.4	13.12	5.55	-	3.82	0.09	5.82	7.17	1.91	0.44	3.5	99.32	18	113	408	23	91	1020	410	21	676	33	849	55.5	138	19.8	82.4	14.6	2.3	8.9	1	4.2	0.7	1.9	0.3	1.5	0.2	13.1	-	27
Prelević et al. 2005	Serbia	Vardar Zone	Avala	LMP	AV 2-1	Oligocene	30.9	14	56	1.37	13.11	5.51	-	3.88	0.09	5.79	6.82	1.9	0.44	4.39	99.3	18	113	401	21	90	1020	460	20	634	33	815	54.6	139	19.7	82	14.4	2.3	8.9	1	4.2	0.7	1.9	0.2	1.5	0.2	11.6	-	25
Prelević et al. 2005	Serbia	Vardar Zone	Avala	LMP	AV 2-3	Oligocene	30.9	14	55.5	1.4	12.86	5.61	-	4.01	0.13	5.86	7.13	1.91	0.45	4.52	99.38	17	107	411	23	116	995	435	20	358	33	841	56	140	19.9	82.1	14.4	2.3	8.8	1	4.3	0.7	1.9	0.2	1.5	0.2	11.8	-	27
Prelević et al. 2005	Serbia	Vardar Zone	Bogovina	LMP	Bo-3	Oligocene	30	15	48.5	2.2	10.09	7.18	-	7.78	0.1	9.13	2.9	3.21	0.79	7.03	98.91	17	157	483	33	288	169	820	22	1035	69	3505	98.5	206.9	25.8	112.3	19.8	5.4	12.6	1.5	5.1	0.8	1.8	0.2	1.5	0.2	26.3	-	32
Prelević et al. 2005	Serbia	Vardar Zone	Bogovina	LMP	Bo2-1	Oligocene	30	15	49.4	2.1	9.78	7.02	-	8.15	0.09	9.68	2.79	3.18	0.85	7.04	100.08	17	160	490	37	301	102	856	20	954	63	3895	86.7	190.1	23.5	102.2	18.3	5.3	11.4	1.4	4.6	0.7	1.7	0.2	1.4	0.2	24.3	-	36
Prelević et al. 2005	Serbia	Vardar Zone	Bogovina	LMP	Bo2-2	Oligocene	30	15	48.9	2.07	9.73	7.4	-	7.99	0.09	9.68	2.78	2.91	0.8	7.27	99.62		167	492	36	293	106	842	22	894	50	3673	93	184	-	88	-	-	-	-	-	-	-	-	-	-	-	-	31
Prelević et al. 2005	Serbia	Vardar Zone	Boljkovac	LMP	Blj2	Oligocene	29.7	14	62.3	0.82	13.7	4.92	-	4.22	0.09	3.56	5.35	2.47	0.32	2.21	99.96	12	93	236	18	111	359	596	25	371	27	831	57.8	114.6	14.4	56.6	10	2	6.8	0.9	4.3	0.8	2	0.3	1.9	0.3	9.7	-	44
Prelević et al. 2005	Serbia	Vardar Zone	Boljkovac	LMP	Blj1	Oligocene	29.7	14	62	0.82	13.83	4.91	-	4.19	0.09	3.61	5.4	2.47	0.32	2.09	99.73	12	93	223	16	105	372	604	25	367	26	855	51.1	111.9	13.5	53.6	9.6	1.9	6.4	0.8	4	0.8	1.9	0.3	1.8	0.3	10.1	-	46
Prelević et al. 2005	Serbia	Vardar Zone	Boljkovac	LMP	Blj3	Oligocene	29.7	14	62	0.8	13.79	4.3	-	4.04	-	2.87	5.51	2.62	0.32	2.39	98.64	-	94	226	17	113	-	597	29	367	28	831	44	108	-	70	-	-	-	-	-	-	-	-	-	-	-	-	42
Prelević et al. 2005	Serbia	Vardar Zone	Borač	LMP	BK01/2-4	Oligocene	22.6	15	53.1	0.97	14.24	6.29	-	6.75	0.1	6.56	3.61	2.49	0.47	5.18	99.76	21	147	341	23	83	135	885	37	296	24	1018	84.8	167.5	19.1	72.5	12.9	2.8	8.8	1.2	6.2	1	2.9	0.4	2.6	0.4	6.7	-	42
Prelević et al. 2005	Serbia	Vardar Zone	Borač	LMP	BK01/2-4A	Oligocene	22.6	15	52.8	1.02	14.56	6.42	-	7.03	0.11	6.65	3.66	2.55	0.48	4.79	100.07	-	163	353	21	83	126	911	35	308	25	1068	-	-	-	-	-	-	-	-	-	-	-	-	-	-	-	-	33
Prelević et al. 2005	Serbia	Vardar Zone	Borač	LMP	BK01/3-3	Oligocene	22.6	15	56.7	0.9	14.87	5.63	-	6.55	0.08	4.2	4.84	3.16	0.49	2.31	99.73	19	130	202	13	56	180	1002	37	387	20	998	82	158.9	18.9	71.4	13.3	3	8.9	1.2	5.7	0.8	2.3	0.3	1.8	0.3	-	-	38
Prelević et al. 2005	Serbia	Vardar Zone	Borač	LMP	BK01/4-B-II	Oligocene	22.6	15	53.3	1.11	14.4	7.08	-	7.76	0.11	5.96	4.84	2.56	0.67	1.65	99.44	-	135	430	26	130	149	1163	54	422	26	1428	-	-	-	-	-	-	-	-	-	-	-	-	-	-	-	-	20
Prelević et al. 2005	Serbia	Vardar Zone	Borač	LMP	BK01/4B	Oligocene	22.6	15	53.3	1.12	14.42	7.15	-	7.74	0.11	5.93	4.85	2.55	0.68	1.51	99.36	-	139	436	21	139	148	1164	54	416	27	1455	-	-	-	-	-	-	-	-	-	-	-	-	-	-	-	-	25
Prelević et al. 2005	Serbia	Vardar Zone	Borač	LMP	BK-3	Oligocene	22.6	14	54.9	0.96	13.14	6.04	-	8.25	0.09	5.93	5.29	2.47	0.66	1.9	99.63	20	129	361	17	132	157	1389	44	488	19	1233	115.3	228.8	28.2	106.8	18.4	4	11.9	1.5	7.4	1.1	3	0.4	2.4	0.4	13.7	-	56
Prelević et al. 2005	Serbia	Vardar Zone	Borač	LMP	BK01/12	Oligocene	22.6	14	53	1.34	11.71	7.43	-	5.68	0.08	5.58	6.24	1.57	0.74	5.77	99.14	22	118	430	25	249	237	919	49	649	33	1309	98.7	209.9	27.6	111.6	19.3	3.5	11.4	1.4	6.8	1.1	3	0.4	2.6	0.4	15.9	-	45
Prelević et al. 2005	Serbia	Vardar Zone	Borač	LMP	BK/1	Oligocene	22.6	14	54.5	0.94	13.1	6.42	-	7.91	0.08	5.52	5.25	2.24	0.67	2.36	98.99	20	134	370	25	118	188	1420	36	406	23	1245	117.4	242.1	28.8	111.5	18.8	4.1	12.1	1.5	7.5	1.1	3	0.4	2.4	0.4	11.3	-	47
Prelević et al. 2005	Serbia	Vardar Zone	Borač	LMP	BK01/3-1	Oligocene	22.6	15	50.4	1.47	10.16	6.66	-	6.2	0.11	12.85	4.62	2.34	0.65	3.77	99.23	20	118	728	38	466	217	825	41	694	33	1455	82.9	199.9	26.8	109.1	18.7	3.1	10.2	1.2	5.6	0.8	2.2	0.3	1.7	0.3	18.8	-	40
Prelević et al. 2005	Serbia	Vardar Zone	Borač	LMP	BK01/3C	Oligocene	22.6	15	49.9	1.44	10.67	7.28	-	6.92	0.11	10.97	1.23	4.13	0.69	6.5	99.84	22	138	613	38	405	319	740	56	656	31	1953	82.2	197.6	26.4	109.2	19.2	3.3	10.5	1.3	6.1	0.9	2.5	0.3	2	0.3	16.8	-	41
Prelević et al. 2005	Serbia	Vardar Zone	Borač	LMP	BK01/3A-2	Oligocene	22.6	15	54	1.29	11.41	6.16	-	5.6	0.1	9.91	5	2.62	0.56	2.9	99.55	18	109	557	27	376	287	824	53	619	28	1100	74.3	175.9	23.2	95	16.2	2.8	9.2	1.1	5.3	0.7	2.1	0.3	1.7	0.3	16.4	-	41
Prelević et al. 2005	Serbia	Vardar Zone	Borač	LMP	BK01/3C	Oligocene/Mio-Pliocene		14	49.9	1.44	10.67	7.28	-	6.92	-	10.97	4.13	1.23	0.69	6.5	99.73	22	138	613	38	405	319	740	56	656	31	1953	82.2	197.6	-	109.2	19.2	3.3	-	1.3	-	-	-	-	2	-	16.8	-	41
Prelević et al. 2005	Serbia	Vardar Zone	Devaje	LMP	Dev	Oligocene	21.8	14	48.6	1.37	13.28	9.25	-	8.55	0.2	3.55	8.79	1.09	0.73	2.97	98.38	-	247	108	30	33	443	1783	39	642	33	3302	101.3	237.7	29.2	121.4	23.9	5.2	15.6	2	9.2	1.6	3.8	0.5	3.1	0.5	16.1	-	52
Prelević et al. 2005	Serbia	Vardar Zone	Golija	LMP	D4	Oligocene	20	14	53.7	1.03	15.37	7.12	-	7.5	0.19	5.11	5.21	2.02	0.76	1.76	99.77	20	184	67	11	19	169	1271	40	342	15	1311	113.4	241.7	27.3	105	17.3	3.8	12.1	1.5	6.8	1.2	3	0.4	2.4	0.4	7.7	-	19
Prelević et al. 2005	Serbia	Vardar Zone	Golija	LMP	D5	Oligocene	20	14	53.7	1	15.07	7.31	-	7.47	0.18	5.14	4.7	2.06	0.75	1.88	99.26	21	184	73	19	18	180	1321	31	334	15	1144	115.3	245.7	27.8	106.7	17.4	4	12	1.5	6.8	1.2	2.9	0.4	2.4	0.4	8.3	-	29
Prelević et al. 2005	Serbia	Vardar Zone	Klinovac	LMP	Klin124	Oligocene	32.7	15	48.2	0.89	12.99	7.03	-	9.59	0.12	5.64	4.26	2.92	1.31	4.59	97.54	20	171	327	20	101	119	1250	26	317	15	2060	37.2	73.1	8.8	35.3	6.5	2.6	5.1	0.7	3.5	0.6	1.7	0.3	1.7	0.3	6.5	-	49
Prelević et al. 2005	Serbia	Vardar Zone	Klinovac	LMP	Klin133	Oligocene	32.7	15	47.9	0.89	13.03	6.6	-	10.87	0.12	5.35	4.34	2.81	1.41	5.64	98.96	24	172	375	31	141	125	1344	21	238	17	2144	55.9	107	12.4	48.1	8.5	2.9	6.2	0.9	4	0.7	2	0.3	2	0.3	6.8	-	58
Prelević et al. 2005	Serbia	Vardar Zone	Mionica	LMP	M00/3	Oligocene/Mio-Pliocene		14	51.2	1.44	11.91	6.89	-	8.69	-	5.38	6.57	1.31	0.7	3.85	97.94	19	113	486	29	399	254	916	45	676	31	984	117.4	261.3	-	133.6	21.9	4.2	-	2.1	-	-	-	-	3.9	-	19.6	-	31
Prelević et al. 2005	Serbia	Vardar Zone	Mionica	LMP	Mionica81a	Oligocene/Mio-Pliocene		14	51	1.43	11.92	7.05	-	8.7	-	5.22	6.55	1.23	0.68	5.83	99.61	20	139	579	35	376	278	1165	42	691	32	1160	98.8	203	-	107.4	17.5	3.6	-	1.7	-	-	-	-	2.9	-	18.1	-	33
Prelević et al. 2005	Serbia	Vardar Zone	Mionica	LMP	Mionica81B	Oligocene/Mio-Pliocene		14	51.9	1.46	11.95	6.92	-	7.87	-	5.24	6.59	1.33	0.68	5.05	98.99	-	147	578	32	408	281	1111	60	672	31	1133		198.6	-	-	-	-	-	-	-	-	-	-	-	-	-	-	30
Prelević et al. 2005	Serbia	Vardar Zone	Ozrem	LMP	Oz204	Oligocene	35	15	50.9	1.07	13.2	6.24	-	8.74	0.16	6.27	2.79	2.95	0.69	5.95	98.96	26	194	383	36	195	131	1055	32	462	24	1573	90.2	194.5	24.5	96.4	16.1	3.6	11.1	1.5	6.2	1.1	2.7	0.4	2.4	0.4	13.1	-	39.3
Prelević et al. 2005	Serbia	Vardar Zone	Ozrem	LMP	Oz205	Oligocene	35	15	50.9	1.06	13.04	6.16	-	8.85	0.16	6.23	2.82	3.01	0.7	6.38	99.31	-	200	357	32	187	-	-	34	464	28	1565	-	-	-	86	-	-	-	-	-	-	-	-	-	-	-	-
Prelević et al. 2005	Serbia	Vardar Zone	Rudnik	LMP	RO/1-II	Oligocene/Mio-Pliocene		14	46.7	1.63	10.8	7.04	-	3.82	-	9.84	6.77	0.57	0.7	11.19	99.06	26	137	695	33	486	221	598	24	676	38	1153	80.6	201.2	-	114.9	19.5	3.3	-	1.5	-	-	-	-	1.8	-	19	-	31
Prelević et al. 2005	Serbia	Vardar Zone	Rudnik	LMP	RO00/1-A	Oligocene/Mio-Pliocene		14	47.3	1.64	10.94	6.95	-	3.82	-	10.4	6.77	0.55	0.71	10.15	99.23	26	145	689	40	530	218	599	24	675	40	1119	82.3	204.7	-	116.2	20.7	3.4	-	1.5	-	-	-	-	1.8	-	18.9	-	31
Prelević et al. 2005	Serbia	Vardar Zone	Rudnik	LMP	R97x/424	Oligocene	31.9	14	51.4	0.98	12.22	7.28	-	4.47	0.1	8.29	9.14	0.16	1.04	3.98	99.06	21	157	424	36	136	411	554	30	423	25	2129	45.7	97.6	11.9	50.1	10.8	2.1	6.5	0.8	3.6	0.6	1.4	0.2	1	0.2	5.4	-	36
Prelević et al. 2005	Serbia	Vardar Zone	Veliki Majadan	LMP	VM01/3	Oligocene	33.5	14	52.9	1.08	11.6	11.57	-	1.42	0.09	7.27	6.51	0.51	0.66	6.08	99.69	12	86	384	18	257	260	307	21	539	32	1853	62.8	154	19.6	84.3	14.6	2.7	9.3	1.2	4.4	0.7	1.8	0.2	1.6	0.2	6.1	-	56
Prelević et al. 2005	Serbia	Vardar Zone	Veliki Majadan	LMP	VM VI/2	Oligocene	33.5	14	50.6	1.15	10.99	4.35	-	9.33	0.18	7.55	7.1	0.3	0.61	7.54	99.7	14	94	454	21	257	380	587	21	568	36	1007	56.4	141	20.4	85.8	15.2	2.7	9.5	1	4.3	0.7	1.8	0.2	1.4	0.2	16.2	-	74
Prelević et al. 2005	Serbia	Vardar Zone	Veliki Majadan	LMP	VM VI/7	Oligocene	33.5	14	53.4	1.04	12.11	2.28	-	9.55	0.15	2.64	6.95	0.09	0.55	11.28	100.04	12	87	371	17	212	275	418	19	515	36	1914	54.4	136.5	17.7	77.1	13.9	2.8	8.9	1.1	4.1	0.7	1.7	0.2	1.5	0.2	12.8	-	50
Prelević et al. 2005	Serbia	Vardar Zone	Veliki Majadan	LMP	VM XII/3	Oligocene	33.5	14	55.6	0.88	12.47	4.6	-	5.6	0.14	6.76	5.89	0.59	0.39	7.06	99.98	12	93	420	24	206	283	399	18	379	25	1072	54.3	121.5	14.7	62.2	10.8	2.2	7.1	0.9	3.6	0.6	1.5	0.2	1.4	0.2	9.6	-	18
Prelević et al. 2005	Serbia	Vardar Zone	Veliki Majadan	LMP	VM XIV/2	Oligocene	33.5	14	57	0.78	12.91	4.57	-	5.4	0.11	5.71	4.98	1.37	0.45	6.53	99.81	12	86	290	22	176	226	450	18	365	28	1060	64.6	139.3	16.3	67.6	11.4	2.3	7.7	1	3.7	0.6	1.6	0.2	1.5	0.2	8.7	-	18
Prelević et al. 2005	Serbia	Vardar Zone	Veliki Majadan	LMP	VM XIV/4	Oligocene	33.5	14	60	0.75	13.87	3.8	-	4.72	0.1	3.99	5.27	1.53	0.4	5.71	100.14	10	78	220	14	101	251	490	17	311	29	1155	55.1	118.6	13.9	57.1	9.8	2	6.5	0.9	3.3	0.6	1.5	0.2	1.3	0.2	7	-	31
Prelević et al. 2005	Serbia	Vardar Zone	Veliki Majadan	LMP	VM XIV/6	Oligocene	33.5	14	61.1	0.98	12.58	3.5	-	4.33	0.09	4.51	6.48	1.42	0.45	4.46	99.9	9	66	258	16	137	359	417	15	527	33	1034	62.1	148.4	18.7	81.3	14	2.5	8.1	1	3.4	0.5	1.2	0.2	1.1	0.2	12.9	-	26
Prelević et al. 2005	Serbia	Vardar Zone	Zabrdica	LMP	ZB01/2	Oligocene	25.6	15	51.5	1.45	10.73	7.28	-	6.3	0.1	10.3	4.36	2.96	0.52	4.06	99.56	22	131	837	33	427	194	586	23	649	32	826	68	168.7	23.7	98.9	16.5	2.9	9.7	1.2	4.7	0.8	2	0.3	1.8	0.3	19.9	-	19
Prelević et al. 2005	Serbia	Vardar Zone	Zabrdica	LMP	ZB01/1	Oligocene/Mio-Pliocene		14	50.4	1.41	10.57	6.83	-	6.84	-	8.5	4.01	1.77	0.52	8.56	99.41	22	137	802	36	465	191	608	23	736	33	1128	66.6	167.2	-	97.6	15.7	3	-	1.2	-	-	-	-	1.9	-	20.1	-	20
Prelević et al. 2005	Serbia	Vardar Zone	Rudnik	LMP	R2	Oligocene	31.9	14	57.8	0.83	13.47	4.1	-	4.55	0.06	3.4	6.09	2.56	0.63	5.59	99.08	10	79	106	13	80	200	700	31	404	18	1141	89.5	187.9	21.7	88.2	15.6	3.5	11.6	1.5	6.2	1	2.7	0.4	2.4	0.4	3.4	-	6
Prelević et al. 2010	Serbia	Vardar Zone	Borač	LMP	BK01/3c	Oligocene	22.78	15	49.88	1.44	10.67	7.28	-	6.92	0.11	10.97	1.23	4.13	0.69	6.5	99.82	22	138	613	-	405	319	740	56	546.5	30.25	1953	82.2	197.6	26.4	109.2	19.2	3.3	10.5	-	6.1	-	2.5	-	2.04	0.3	15.4	2.12	41
Prelević et al. 2010	Serbia	Vardar Zone	Borač	LMP	BK01/3c	Oligocene	22.78	15	49.88	1.44	10.67	7.28	-	6.92	0.11	10.97	1.23	4.13	0.69	6.5	99.82	22	138	613	-	405	319	740	56	546.5	30.25	1953	82.2	197.6	26.4	109.2	19.2	3.3	10.5	-	6.1	-	2.5	-	2.04	0.3	15.4	2.12	41
Prelević et al. 2010	Serbia	Vardar Zone	Borač	LMP	BK01/3c	Oligocene	22.78	15	49.88	1.44	10.67	7.28	-	6.92	0.11	10.97	1.23	4.13	0.69	6.5	99.82	22	138	613	-	405	319	740	56	546.5	30.25	1953	82.2	197.6	26.4	109.2	19.2	3.3	10.5	-	6.1	-	2.5	-	2.04	0.3	15.4	2.12	41
Prelević et al. 2010	Serbia	Vardar Zone	Borač	LMP	BK01/3c	Oligocene	22.78	15	49.88	1.44	10.67	7.28	-	6.92	0.11	10.97	1.23	4.13	0.69	6.5	99.82	22	138	613	-	405	319	740	56	546.5	30.25	1953	82.2	197.6	26.4	109.2	19.2	3.3	10.5	-	6.1	-	2.5	-	2.04	0.3	15.4	2.12	41
Prelević et al. 2010	Serbia	Vardar Zone	Borač	LMP	BK01/3c	Oligocene	22.78	15	49.88	1.44	10.67	7.28	-	6.92	0.11	10.97	1.23	4.13	0.69	6.5	99.82	22	138	613	-	405	319	740	56	546.5	30.25	1953	82.2	197.6	26.4	109.2	19.2	3.3	10.5	-	6.1	-	2.5	-	2.04	0.3	15.4	2.12	41
Prelević et al. 2010	Serbia	Vardar Zone	Borač	LMP	BK01/3c	Oligocene	22.78	15	49.88	1.44	10.67	7.28	-	6.92	0.11	10.97	1.23	4.13	0.69	6.5	99.82	22	138	613	-	405	319	740	56	546.5	30.25	1953	82.2	197.6	26.4	109.2	19.2	3.3	10.5	-	6.1	-	2.5	-	2.04	0.3	15.4	2.12	41
Prelević et al. 2010	Serbia	Vardar Zone	Borač	LMP	BK01/3c	Oligocene	22.78	15	49.88	1.44	10.67	7.28	-	6.92	0.11	10.97	1.23	4.13	0.69	6.5	99.82	22	138	613	-	405	319	740	56	546.5	30.25	1953	82.2	197.6	26.4	109.2	19.2	3.3	10.5	-	6.1	-	2.5	-	2.04	0.3	15.4	2.12	41
Prelević et al. 2010	Serbia	Vardar Zone	Borač	LMP	BK01/3c	Oligocene	22.78	15	49.88	1.44	10.67	7.28	-	6.92	0.11	10.97	1.23	4.13	0.69	6.5	99.82	22	138	613	-	405	319	740	56	546.5	30.25	1953	82.2	197.6	26.4	109.2	19.2	3.3	10.5	-	6.1	-	2.5	-	2.04	0.3	15.4	2.12	41
Cvetković et al. 2004	Serbia	Vardar Zone	Avala	LMP	Av-1	Oligocene	30.88	14	57.05	1.4	12.88	5.6	-	3.92	0.09	6.06	7.44	1.58	0.46	3.5	99.98	-	113	346	-	84	554	394	21	647	34	862	55.53	139.5	19.8	82.25	14.48	2.26	8.82	0.96	4.23	0.7	1.91	0.25	1.5	0.23	-	-	36
Cvetković et al. 2004	Serbia	Vardar Zone	Avala	LMP	AV-1	Oligocene/Mio-Pliocene		14	57.05	1.4	12.88	5.6	-	3.92	-	6.06	7.44	1.58	0.46	3.5	99.89	-	113	346	-	84	554	394	21	647	34	862	55.53	139.5	-	82.25	14.48	2.26	-	0.96	-	-	-	-	1.5	-	-	-	36
Cvetković et al. 2004	Serbia	Vardar Zone	Bogovina	LMP	BO22	Oligocene/Mio-Pliocene		15	48.92	2.07	9.73	7.4	-	7.99	-	9.68	2.78	2.91	0.8	7.27	99.55	-	167	492	-	293	106	842	22	894	50	3673	81.1	188.9	-	98.9	16.78	4.14	-	-	-	-	-	-	1.26	-		-	31
Cvetković et al. 2004	Serbia	Vardar Zone	Cer	LMP	114	Pliocene	2.86	15	52.53	1.17	14.02	9.61	-	7.47	0.12	6.35	3.71	3.83	1.23	0.26	100.3	-		337	-	181	155	972	27	304	18	1570	50	95.1	10.6	49.3	8.5	1.99	6	1	5.4	1.07	2.8	0.4	2.5	0.32		-	48
Cvetković et al. 2004	Serbia	Vardar Zone	Devaje	LMP	115	Oligocene	21.85	14	48.6	1.37	13.28	9.25	-	8.55	0.2	3.55	8.79	1.09	0.73	2.97	98.38	-	247	108	-	33	443	1783	35	571	31	3302	85.3	209	20.6	110.8	19.57	4.68	12.63	-	9	1.63	4.04	-	2.94	0.45	-	-	48
Cvetković et al. 2004	Serbia	Vardar Zone	Klinovac	LMP	124	Oligocene	32.73	14	48.36	0.89	12.51	6.68	-	9.05	0.12	6.36	5.39	2.12	1.52	5.7	98.7	-	147	315	-	124	148	1110	21	253	23	2080	41.7	81.6	8.7	41.4	7.6	1.85	5.8	0.9	4.3	0.87	2.3	0.3	2	0.23	-	-	35
Cvetković et al. 2004	Serbia	Vardar Zone	Ozrem	LMP	203	Oligocene	35	15	50.905	1.065	13.12	6.2	-	8.795	0.16	6.25	2.805	2.98	0.695	6.38	99.355	-	197	435	-	184	101	1120	35	433	18	1400	95.4	197	22.2	104	17.7	3.51	12.3	1.7	7.8	1.4	3.5	0.4	3.1	0.36		-	74
Cvetković et al. 2004	Serbia	Vardar Zone	Rudnik	LMP	Ro00/1	Oligocene	30.21	14	50.11	1.81	10.01	7.86	-	3.86	0.08	11.95	6.37	0.35	0.589	11.03	104.019	-	180	517	-	653	204	550	12	613	36	410	77	200.8	20	114.9	18.51	3.5	9.46	-	5.78	1.03	2.57	-	1.58	0.24	-	-	86
Cvetković et al. 2004	Serbia	Vardar Zone	Rudnik	LMP	RO00/1	Oligocene/Mio-Pliocene		14	50.11	1.81	10.01	7.86	-	3.86	-	11.95	6.37	0.35	0.589	11.03	103.939	-	180	517	-	653	204	550	12	613	36	410	77	200.8	-	114.9	18.51	3.5	-	-	-	-	-	-	1.58	-	-	-	86
Prelević et al. 2004	Serbia	Vardar Zone	Dinarides	LMP	ZB01/2	Oligocene/Mio-Pliocene		15	51.5	1.45	10.73	7.28	-	6.3	-	10.3	4.36	2.96	0.52	4.06	99.46	22	131	837	33	427	194	586	23	649	32	826	68.01	168.7	-	98.92	16.54	2.85	-	1.23	-	-	-	-	1.84	-	19.9	-	19
Prelević et al. 2004	Serbia	Vardar Zone	Dinarides	LMP	ZB01/1	Oligocene/Mio-Pliocene		14	50.42	1.41	10.57	6.83	-	6.84	-	8.5	4.01	1.77	0.52	8.56	99.43	22	137	802	36	465	191	608	23	736	33	1128	66.63	167.22	-	97.59	15.73	2.98	-	1.19	-	-	-	-	1.85	-	20.1	-	20
Prelević et al. 2004	Serbia	Vardar Zone	Dinarides	LMP	RO0/1-II	Oligocene/Mio-Pliocene		14	46.68	1.63	10.8	7.04	-	3.82	-	9.84	6.77	0.57	0.7	11.19	99.04	26	137	695	33	486	221	598	24	676	38	1153	80.6	201.22	-	114.89	19.49	3.28	-	1.47	-	-	-	-	1.75	-	19	-	31
Prelević et al. 2004	Serbia	Vardar Zone	Dinarides	LMP	RO0/1-A	Oligocene/Mio-Pliocene		14	47.27	1.64	10.94	6.95	-	3.82	-	10.4	6.77	0.55	0.71	10.15	99.2	26	145	689	40	530	218	599	24	675	40	1119	82.34	204.7	-	116.16	20.69	3.39	-	1.51	-	-	-	-	1.81	-	18.9	-	31
Altherr et al. 2004	Serbia	Vardar Zone	Dinarides	LMP	KK-72	Oligocene/Mio-Pliocene		14	49.83	1.44	11.5	2.38	4.39	7.92	-	9.2	6.82	1.39	1.42	1.3	97.59	-	-	286	-	117	372	1091	21	478	27	2292	56	126	-	69	11	3.5	-	1.06	-	-	-	-	1.99	-	13.3	1.26	19
Altherr et al. 2004	Macedonia	Vardar Zone	Dinarides	LMP	SN-107	Oligocene/Mio-Pliocene		14	53.25	1.2	12.4	3.25	3.24	6.24	-	8.71	5.63	2.77	1.14	0.43	98.26	21	-	412	-	279	217	1624	26	528	24	2813	109	222	-	122	17.3	3.7	-	1.15	-	-	-	-	2.36	-	15.2	1.06	37
Altherr et al. 2004	Macedonia	Vardar Zone	Dinarides	LMP	SN-116	Oligocene/Mio-Pliocene		14	50.6	1.42	12.31	2.44	3.96	6.9	-	9.73	6.2	2.15	1.42	1.16	98.29	22	-	352	-	297	316	1687	25	501	25	3496	110	227	-	120	17.9	3.6	-	1.07	-	-	-	-	1.91	-	15.4	0.97	27
Altherr et al. 2004	Macedonia	Vardar Zone	Dinarides	LMP	MN-10	Oligocene/Mio-Pliocene		14	49.45	1.15	12.23	2.69	4.29	7.43	-	9.87	7.01	1.89	1.62	0.35	97.98	25.5	-	309	-	222	360	1141	25	312	21	2833	44	85	-	43	9.8	2.2	-	0.94	-	-	-	-	2.04	-	9.5	1.07	48
Altherr et al. 2004	Macedonia	Vardar Zone	Dinarides	LMP	MN-105	Oligocene/Mio-Pliocene		14	47.91	1.19	11.93	2.72	4.43	8.34	-	10.32	6.91	1.54	1.72	1.18	98.19	26	-	335	-	207	362	1269	24	315	23	2711	46	85	-	43	9.5	2.1	-	0.91	-	-	-	-	2	-	9.5	1.01	44
Altherr et al. 2004	Macedonia	Vardar Zone	Dinarides	LMP	KLP-84	Oligocene/Mio-Pliocene		14	50.93	0.92	12.88	3.56	3.1	7.42	-	8.34	5.63	1.8	1.54	1.69	97.81	24.6	-	279	-	134	159	975	20	226	15	2188	42	75	-	35	8.1	1.8	-	0.81	-	-	-	-	1.8	-	6.9	0.77	54
Altherr et al. 2004	Macedonia	Vardar Zone	Dinarides	LMP	SJB-117	Oligocene/Mio-Pliocene		15	46.79	2.14	14.31	4.05	3.41	8.33	-	7.38	6.07	3.14	1.73	0.35	97.7	24	-	144	-	135	389	1712	26	409	34	4189	135	248	-	112	18.5	3.6	-	1.2	-	-	-	-	2.09	-	12.3	1.47	-
Altherr et al. 2004	Macedonia	Vardar Zone	Dinarides	LMP	SN-111	Oligocene/Mio-Pliocene		15	55.25	0.9	14.7	3.12	2.41	6.08	-	6.2	5.25	3.43	1.11	0.24	98.69	17.2	-	179	-	128	234	1392	24	308	26	2578	74	127	-	53	9.3	2.1	-	0.85	-	-	-	-	2.19	-	8.8	1.37	48
Altherr et al. 2004	Macedonia	Vardar Zone	Dinarides	LMP	NI-152	Oligocene/Mio-Pliocene		15	60.12	0.72	14.01	2.42	2.61	4.97	-	4.3	5.65	3.44	0.9	0.05	99.19	15.6	-	65	-	57	339	774	25	275	18	1027	36	63	-	32	6.9	1.5	-	0.8	-	-	-	-	2.09	-	7.3	0.95
Altherr et al. 2004	Macedonia	Vardar Zone	Dinarides	LMP	PR-86	Oligocene/Mio-Pliocene		15	51.11	0.97	15.32	3.95	3.03	7.69	-	7.65	4	3.68	1.15	0.33	98.88	22.9	-	166	-	142	188	1487	26	289	24	1927	76	141	-	66	11.1	2.5	-	1.05	-	-	-	-	2.7	-	8.1	1.39	50
Altherr et al. 2004	Macedonia	Vardar Zone	Dinarides	LMP	BO-138	Oligocene/Mio-Pliocene		15	50.89	2.17	10.08	4.71	2.17	7.99	-	8.88	3.08	3.55	0.88	3.12	97.52	17.7	-	433	-	333	163	933	17	988	61	3511	97	186	-	100	20.3	4.1	-	1.15	-	-	-	-	1.36	-	27.4	3.01	33
Altherr et al. 2004	Macedonia	Vardar Zone	Dinarides	LMP	BO-154	Oligocene/Mio-Pliocene		15	50.29	2.08	9.92	3.89	2.69	8.08	-	11.47	3.03	3.06	0.98	3.14	98.63	15.6	-	445	-	373	85	1101	20	897	53	3268	81	158	-	81	15.8	3.8	-	1.11	-	-	-	-	1.05	-	22.4	2.62	-
Prelević et al. 2005	Macedonia	Vardar Zone	Bogovina	LMP	Bo-3	Oligocene/Mio-Pliocene		15	48.5	2.2	10.09	7.18	-	7.78	-	9.13	2.9	3.21	0.79	7.03	98.81	17	157	483	33	288	169	820	22	1035	69	3505	98.5	206.9	-	112.3	19.8	5.4	-	1.5	-	-	-	-	1.5	-	26.3	-	32
Prelević et al. 2005	Macedonia	Vardar Zone	Bogovina	LMP	Bo2-1	Oligocene/Mio-Pliocene		15	49.4	2.1	9.78	7.02	-	8.15	-	9.68	2.79	3.18	0.85	7.04	99.99	17	160	490	37	301	102	856	20	954	63	3895	86.7	190.1	-	102.2	18.3	5.3	-	1.4	-	-	-	-	1.4	-	24.3	-	36
Prelević et al. 2005	Macedonia	Vardar Zone	Bogovina	LMP	Bo2-2	Oligocene/Mio-Pliocene		15	48.9	2.07	9.73	7.4	-	7.99	-	9.68	2.78	2.91	0.8	7.27	99.53	-	167	492	36	293	106	842	22	894	50	3673	93	184	-	88			-	-	-	-	-	-	-	-	-	-	31
Prelević et al. 2005	Macedonia	Vardar Zone	Borač	LMP	BK01/3-1	Oligocene/Mio-Pliocene		15	50.4	1.47	10.16	6.66	-	6.2	-	12.85	4.62	2.34	0.65	3.77	99.12	20	118	728	38	466	217	825	41	694	33	1455	82.9	199.9	-	109.1	18.7	3.1	-	1.2	-	-	-	-	1.7	-	18.8	-	40
Prelević et al. 2005	Macedonia	Vardar Zone	Borač	LMP	BK01/3A-2	Oligocene/Mio-Pliocene		15	54	1.29	11.41	6.16	-	5.6	-	9.91	5	2.62	0.56	2.9	99.45	18	109	557	27	376	287	824	53	619	28	1100	74.3	175.9	-	95	16.2	2.8	-	1.1	-	-	-	-	1.7	-	16.4	-	41
Prelević et al. 2005	Macedonia	Vardar Zone	Zabrdica	LMP	ZB01/2	Oligocene/Mio-Pliocene		15	51.5	1.45	10.73	7.28	-	6.3	-	10.3	4.36	2.96	0.52	4.06	99.46	22	131	837	33	427	194	586	23	649	32	826	68	168.7	-	98.9	16.5	2.9	-	1.2	-	-	-	-	1.8	-	19.9	-	19
Prelević et al. 2008	Macedonia	Vardar Zone	Cer	LMP	04CR02	Oligocene/Mio-Pliocene		15	51.96	1.37	13.89	7.48	-	6.99	-	6.8	3.46	3.97	1.23	2.24	99.39	21.9	157.7	278.8	-	180.8	184.9	920.8	25.7	296.3	25	1593.5	41.8	83.97	-	40.6	7.33	1.91	-	-	-	-	-	-	2.51	-	7.59	1.45	29
Prelević et al. 2008	Macedonia	Vardar Zone	Cer	LMP	04CR03	Oligocene/Mio-Pliocene		15	51.96	1.37	13.89	7.48	-	6.99	-	6.8	3.46	3.97	1.23	2.24	99.39	21.9	157.7	278.8	-	180.8	184.9	920.8	25.7	296.3	25	1593.5	41.8	83.97	-	40.6	7.33	1.91	-	-	-	-	-	-	2.51	-	7.59	1.45	24
Prelević et al. 2008	Macedonia	Vardar Zone	Cer	LMP	04CR01	Oligocene/Mio-Pliocene		15	51.92	1.18	14.52	6.99	-	7.01	-	6.6	4.07	3.24	1.29	1.92	98.74	20.4	149.7	261.4	-	176.2	71.7	978.4	23.5	287	25.9	1945.7	43.93	87.63	-	41.52	7.21	1.96	-	-	-	-	-	-	2.33	-	7.49	1.41	25
Prelević et al. 2008	Macedonia	Vardar Zone	Gradina	LMP	04GR04	Oligocene/Mio-Pliocene		14	53.58	1.12	13.01	6.58	-	6.17	-	7.43	5.89	2.69	1.06	0.89	98.42	21.2	110.2	343.7	-	246.7	224.3	1451.8	24.4	487.1	23.4	2445.5	90.84	200.11	-	109	14.32	3.15	-		-	-	-	-	2.25	-	12.53	1.1	30
Prelević et al. 2008	Macedonia	Vardar Zone	Gradina	LMP	04GR05	Oligocene/Mio-Pliocene		14	52.71	1.2	11.99	7	-	6.55	-	9.01	5.65	2.64	1.19	0.75	98.69	25.4	138.4	439.3	-	321.9	276.9	1423.7	24.8	503.6	22.3	2506.2	91.84	210.52	-	119.27	15.76	3.3	-		-	-	-	-	2.23	-	13.22	1.03	31
Prelević et al. 2008	Macedonia	Vardar Zone	Jezevo Brdo	LMP	03JB02	Oligocene/Mio-Pliocene		14	46.44	2.22	13.94	7.84	-	8.59	-	7.46	6.25	2.85	1.7	1.49	98.78	24.5	177.4	167	-	147	342.4	1524.7	22.1	423.7	30.8	4102.4	117.68	232.29	-	107.92	15.5	3.57	-		-	-	-	-	1.91	-	11.06	1.23	27
Prelević et al. 2008	Macedonia	Vardar Zone	Jezevo Brdo	LMP	03JB01	Oligocene/Mio-Pliocene		15	46.65	2.58	13.46	7.69	-	7.91	-	7.39	3.49	4.07	1.89	5.52	100.65	24.9	148.1	215	-	156	224.5	1369.4	21.6	466.3	30.7	4131.6	104.57	195.84	-	101.47	15.05	3.35	-	-	-	-	-	-	1.8	-	12.94	1.27	26
Prelević et al. 2008	Macedonia	Vardar Zone	Keresnika Krasta	LMP	03KK04	Oligocene/Mio-Pliocene		14	49.31	1.37	11.04	7.28	-	8.48	-	9.66	6.09	1.55	1.48	2.6	98.86	27.9	167	398.7	-	149.3	169.1	986.2	20.5	431	25.4	2062.6	54.79	124.21	-	70.34	10.59	2.32	-		-	-	-	-	1.77	-	11.54	1.24	23
Prelević et al. 2008	Macedonia	Vardar Zone	Keresnika Krasta	LMP	03KK01	Oligocene/Mio-Pliocene		14	49.68	1.43	11.29	7.31	-	8.74	-	9.38	6	1.29	1.44	2.77	99.33	27.7	165.2	382.2	-	117.5	224.2	957.2	20.2	440.2	26.7	1975.3	54.05	122.33	-	68.21	10.35	2.25	-		-	-	-	-	1.83	-	11.95	1.28	21
Prelević et al. 2008	Macedonia	Vardar Zone	Ksino Brdo	LMP	04KS01	Oligocene/Mio-Pliocene		14	47.3	1.19	13.12	9.03	-	9.52	-	9.47	5.21	2.53	1.64	1.83	100.84	28.5	172.7	219.2	-	79.3	194.4	1323.8	27.9	357.4	27.8	2397.8	59.34	118.89	-	62.69	10.96	2.79	-		-	-	-	-	2.44	-	9.32	1.67	47
Prelević et al. 2008	Macedonia	Vardar Zone	Ksino Brdo	LMP	04KS02	Oligocene/Mio-Pliocene		14	47.29	1.19	13.08	8.98	-	9.44	-	8.71	5.31	2.47	1.64	1.34	99.45	28.2	182.1	227.5	-	91.2	225.6	1308.3	27.5	339.7	26.8	2356	57.65	116.53	-	61.69	11.21	2.7	-		-	-	-	-	2.33	-	8.84	1.59	43
Prelević et al. 2008	Macedonia	Vardar Zone	Mlado Nagoricane	LMP	03MN01	Oligocene/Mio-Pliocene		14	48.12	1.18	12.23	7.91	-	7.81	-	9.16	6.96	2	1.6	1.2	98.17	26.6	168.3	392.8	-	266.7	257.2	1054.6	22.6	324.1	21.2	2528.3	35.77	73.58	-	40.81	7.4	1.84	-		-	-	-	-	2.08	-	8.51	1.05	40
Prelević et al. 2008	Macedonia	Vardar Zone	Mlado Nagoricane	LMP	03MN07	Oligocene/Mio-Pliocene		14	48.93	1.18	12.38	7.75	-	7.71	-	9.44	6.91	2.28	1.64	0.76	98.98	24.4	167.4	367.4	-	232.9	259.1	1080.5	22.5	307.7	21.2	2579.5	37.59	80.67	-	43.17	7.84	1.96	-		-	-	-	-	2.05	-	8.1	1.05	42
Prelević et al. 2008	Macedonia	Vardar Zone	Slavujevac	LMP	04SL01	Oligocene/Mio-Pliocene		15	50.2	0.94	14.71	7.09	-	9.29	-	7.52	3.64	3.44	1.04	1.07	98.94	21.6	136.7	165.5	-	151.3	294.4	1178.2	24.9	273.2	22.4	1559.2	56.61	110.16	-	51.99	8.33	2.08	-	-	-	-	-	-	2.51	-	6.85	1.39	34
Prelević et al. 2008	Macedonia	Vardar Zone	Zebrnjak	LMP	04ZBR01	Oligocene/Mio-Pliocene		14	48.35	1.16	12.06	7.78	-	8.53	-	9.9	6.63	2.17	1.65	0.11	98.34	31.5	170.5	421.2	-	275.4	343.6	1105	22.3	313.9	22.1	2554.2	37.32	79.6	-	43.86	7.96	2.08	-		-	-	-	-	2	-	8.02	1.06	28
Prelević et al. 2010	Macedonia	Vardar Zone	Cer	LMP	04CR02	Pliocene	3.49	15	51.96	1.37	13.89	7.48	-	6.99	0.13	6.8	3.46	3.97	1.23	2.24	99.52	21.87	157.72	278.77	-	180.77	184.88	920.82	25.74	296.26	25.04	1593.48	41.8	83.97	10.06	40.6	7.33	1.91	5.91	-	4.89	-	2.32	-	2.51	0.38	7.59	1.45	29
Prelević et al. 2010	Macedonia	Vardar Zone	Cer	LMP	04CR02			15	51.96	1.37	13.89	7.48	-	6.99	0.13	6.8	3.46	3.97	1.23	2.24	99.52	21.87	157.72	278.77	-	180.77	184.88	920.82	25.74	296.26	25.04	1593.48	41.8	83.97	10.06	40.6	7.33	1.91	5.91	-	4.89	-	2.32	-	2.51	0.38	7.59	1.45	6.49
Prelević et al. 2010	Macedonia	Vardar Zone	Cer	LMP	04CR03	Pliocene	3.49	15	51.96	1.37	13.89	7.48	-	6.99	0.13	6.8	3.46	3.97	1.23	2.24	99.52	21.87	157.72	278.77	-	180.77	184.88	920.82	25.74	296.26	25.04	1593.48	41.8	83.97	10.06	40.6	7.33	1.91	5.91	-	4.89	-	2.32	-	2.51	0.38	7.59	1.45	24
Prelević et al. 2010	Macedonia	Vardar Zone	Cer	LMP	04CR01	Pliocene	3.49	15	51.92	1.18	14.52	6.99	-	7.01	0.13	6.6	4.07	3.24	1.29	1.92	98.87	20.45	149.72	261.38	-	176.19	71.67	978.39	23.5	286.97	25.85	1945.71	43.93	87.63	10.37	41.52	7.21	1.96	5.77	-	4.41	-	2.34	-	2.33	0.35	7.49	1.41	25
Prelević et al. 2010	Macedonia	Vardar Zone	Cer	LMP	04CR01			15	51.92	1.18	14.52	6.99	-	7.01	0.13	6.6	4.07	3.24	1.29	1.92	98.87	20.45	149.72	261.38	-	176.19	71.67	978.39	23.5	286.97	25.85	1945.71	43.93	87.63	10.37	41.52	7.21	1.96	5.77	-	4.41	-	2.34	-	2.33	0.35	7.49	1.41	17.73
Prelević et al. 2010	Macedonia	Vardar Zone	Gradina	LMP	04GR04	Pliocene	2.87	15	53.58	1.12	13.01	6.58	-	6.17	0.12	7.43	5.89	2.69	1.06	0.89	98.54	21.23	110.22	343.65	-	246.74	224.35	1451.76	24.44	487.11	23.35	2445.55	90.84	200.11	26.06	109	14.32	3.15	8.47	-	4.94	-	2.37	-	2.25	0.32	12.53	1.1	30
Prelević et al. 2010	Macedonia	Vardar Zone	Gradina	LMP	04GR05	Pliocene	2.87	15	52.71	1.2	11.99	7	-	6.55	0.13	9.01	5.65	2.64	1.19	0.75	98.82	25.42	138.36	439.29	-	321.89	276.93	1423.74	24.77	503.57	22.33	2506.18	91.84	210.52	28.12	119.27	15.76	3.3	9.09	-	5.09	-	2.42	-	2.23	0.33	13.22	1.03	31
Prelević et al. 2010	Macedonia	Vardar Zone	Gradina	LMP	04GR02			15	53.58	1.12	13.01	6.58	-	6.17	0.12	7.43	5.89	2.69	1.06	0.89	98.54	21.23	110.22	343.65	-	246.74	224.35	1451.76	24.44	487.11	23.35	2445.55	90.84	200.11	26.06	109	14.32	3.15	8.47	-	4.94	-	2.37	-	2.25	0.32	12.53	1.1	16.16
Prelević et al. 2010	Macedonia	Vardar Zone	Gradina	LMP	04GR03			15	53.24	1.09	12.59	6.69	-	6.36	0.13	8.39	5.65	2.8	1.05	1.06	99.05	25.4	123.63	386.13	-	298.95	215.67	1403.34	23.09	436.55	20.86	2325.78	87.25	199.06	25.66	105.67	14	3.16	8.05	-	4.93	-	2.2	-	2.06	0.29	11.17	0.98	16.31
Prelević et al. 2010	Macedonia	Vardar Zone	Gradina	LMP	04GR04			15	53.7	1.11	12.88	6.62	-	6.31	0.13	7.95	5.89	2.96	1.11	0.57	99.23	21.55	125.16	367.81	-	238.78	231.23	1530.76	26.03	501.46	23.5	2575.68	98.51	214.39	27.98	117.44	15.71	3.37	9.09	-	5.31	-	2.2	-	2.35	0.34	13.11	1.14	20.51
Prelević et al. 2010	Macedonia	Vardar Zone	Gradina	LMP	GR1			15	54.42	1.11	13.07	6.68	-	6.29	0.13	7.5	5.75	3.01	1.1	0.03	99.09	22.79	128.42	369.79	-	256.27	219.47	1458.17	26.55	484.61	23.07	2419.47	94.88	207.18	26.94	113.11	15.02	3.27	8.83	-	5.39	-	2.51	-	2.41	0.36	12.45	1.1	18.33
Prelević et al. 2010	Macedonia	Vardar Zone	Gradina	LMP	04GR05			14	52.71	1.2	11.99	7	-	6.55	0.13	9.01	5.65	2.64	1.19	0.75	98.82	25.42	138.36	439.29	-	321.89	276.93	1423.74	24.77	503.57	22.33	2506.18	91.84	210.52	28.12	119.27	15.76	3.3	9.09	-	5.09	-	2.42	-	2.23	0.33	13.22	1.03	31
Prelević et al. 2010	Macedonia	Vardar Zone	Gradina	LMP	GR2			14	53.53	1.17	13.02	6.74	-	5.8	0.12	7.54	6.15	2.69	1.13	1.19	99.08	23.07	120.27	392.67	-	266.07	254.24	1519.94	29.89	548.11	25.6	2662.53	123.15	215.17	32.95	136.89	17.86	3.59	10.43	-	5.97	-	2.83	-	2.59	0.37	14.19	1.2	36.96
Prelević et al. 2010	Macedonia	Vardar Zone	Jezevo Brdo	LMP	03JB01	Pliocene	5.98	15	46.65	2.58	13.46	7.69	-	7.91	0.11	7.39	3.49	4.07	1.89	5.52	100.76	24.87	148.12	215	-	156	224.49	1369.36	21.6	466.29	30.65	4131.57	104.57	195.84	24.46	101.47	15.05	3.35	8.19	-	4.72	-	2.03	-	1.8	0.26	12.94	1.27	26
Prelević et al. 2010	Macedonia	Vardar Zone	Jezevo Brdo	LMP	03JB06			15	46.74	2.19	14.13	8.09	-	8.44	0.13	7.62	6.28	3.01	1.68	0.65	98.96	25.27	174.6	160	-	143	283.3	1530.47	22.71	425.39	29.89	4005.83	119.35	230.36	27.02	109.24	15.89	3.6	8.77	-	4.8	-	2.15	-	1.9	0.28	10.99	1.13	32
Prelević et al. 2010	Macedonia	Vardar Zone	Jezevo Brdo	LMP	03JB08			15	61.85	0.87	14.36	5.12	-	3.53	0.09	3.67	3.93	3.84	0.56	2.08	99.9	17.02	110.36		-		136.12	640.57	17.04	206.46	19.49	1247.37	37.67	85.61	9.39	36.54	6.03	1.36	4.27	-	3.3	-	1.74	-	1.78	0.29	5.39	1.49
Prelević et al. 2010	Macedonia	Vardar Zone	Jezevo Brdo	LMP	03JB07			15	46.05	2.23	13.81	7.69	-	8.69	0.12	7.02	6.36	2.93	1.68	1.49	98.07	23.4	174.49	168	-	146	359.74	1474.15	21.29	385.72	32.86	3968.36	106.12	228.12	26.18	99.76	14.16	3.04	8.2	-	4.63	-	2.06	-	1.88	0.26	10.37	1.48	30
Prelević et al. 2010	Macedonia	Vardar Zone	Jezevo Brdo	LMP	04JB02			15	45.47	2.53	13.27	7.63	-	7.99	0.11	7.6	2.99	3.95	1.87	5.48	98.89	23.55	172.78	200	-	167	294.06	1127.02	20.68	411.57	32.62	3719.52	96.69	211.49	25.51	101.1	14.67	3.21	8.43	-	4.5	-	1.93	-	1.64	0.24	11.16	1.72	24
Prelević et al. 2010	Macedonia	Vardar Zone	Jezevo Brdo	LMP	03JB02	Pliocene	5.98	14	46.44	2.22	13.94	7.84	-	8.59	0.13	7.46	6.25	2.85	1.7	1.49	98.91	24.48	177.38	167	-	147	342.42	1524.69	22.1	423.66	30.81	4102.35	117.68	232.29	26.89	107.92	15.5	3.57	8.54	-	4.75	-	2.08	-	1.91	0.28	11.06	1.23	27
Prelević et al. 2010	Macedonia	Vardar Zone	Jezevo Brdo	LMP	03JB03			14	46.98	2.36	13.66	7.8	-	7.98	0.12	7.21	6.58	2.88	1.73	0.88	98.18	23.64	168.41	187	-	153	414.36	1504.65	21.25	433.41	31.5	4252.91	107.81	214.36	25.6	103.47	14.93	3.51	8.17	-	4.63	-	2	-	1.91	0.3	11.26	1.26	28
Prelević et al. 2010	Macedonia	Vardar Zone	Kisino Brdo	LMP	04KS01	Pliocene	3.33	15	47.3	1.19	13.12	9.03	-	9.52	0.16	9.47	5.21	2.53	1.64	1.83	101	28.47	172.71	219.18	-	79.29	194.41	1323.82	27.93	357.35	27.77	2397.76	59.34	118.89	15.04	62.69	10.96	2.79	8.45	-	5.83	-	2.66	-	2.44	0.36	9.32	1.67	47
Prelević et al. 2010	Macedonia	Vardar Zone	Kisino Brdo	LMP	04KS02	Pliocene	3.33	15	47.29	1.19	13.08	8.98	-	9.44	0.15	8.71	5.31	2.47	1.64	1.34	99.6	28.22	182.13	227.54	-	91.21	225.6	1308.32	27.52	339.68	26.84	2356.05	57.65	116.53	14.77	61.69	11.21	2.7	8.33	-	5.77	-	2.64	-	2.33	0.34	8.84	1.59	43
Prelević et al. 2010	Macedonia	Vardar Zone	Kisino Brdo	LMP	04KS02			15	47.29	1.19	13.08	8.98	-	9.44	0.15	8.71	5.31	2.47	1.64	1.34	99.6	28.22	182.13	227.54	-	91.21	225.6	1308.32	27.52	339.68	26.84	2356.05	57.65	116.53	14.77	61.69	11.21	2.7	8.33	-	5.77	-	2.64	-	2.33	0.34	8.84	1.59	20.29
Prelević et al. 2010	Macedonia	Vardar Zone	Kisino Brdo	LMP	04KS03			15	47.39	1.44	15.4	7.82	-	9.21	0.13	7.74	3.27	2.39	0.95	3.43	99.17	21.32	158.75	218.48	-	174.23	107.66	1961.36	24.03	280.99	22.97	2577.45	115.1	212.84	23.07	85.74	12.05	2.79	7.72	-	4.99	-	2.36	-	2.17	0.31	6.66	1.16	13.32
Prelević et al. 2010	Macedonia	Vardar Zone	Kuresnicka Krasta	LMP	03KK04	Pliocene	2.04	14	49.31	1.37	11.04	7.28	-	8.48	0.12	9.66	6.09	1.55	1.48	2.6	98.98	27.93	166.99	398.66	-	149.25	169.08	986.23	20.52	430.97	25.39	2062.64	54.79	124.21	16.78	70.34	10.59	2.32	6.61	-	4.27	-	2	-	1.77	0.25	11.54	1.24	23
Prelević et al. 2010	Macedonia	Vardar Zone	Kuresnicka Krasta	LMP	03KK01	Pliocene	2.04	14	49.68	1.43	11.29	7.31	-	8.74	0.12	9.38	6	1.29	1.44	2.77	99.45	27.66	165.2	382.17	-	117.47	224.17	957.18	20.17	440.16	26.68	1975.31	54.05	122.33	16.43	68.21	10.35	2.25	6.51	-	4.19	-	1.97	-	1.83	0.28	11.95	1.28	21
Prelević et al. 2010	Macedonia	Vardar Zone	Kuresnicka Krasta	LMP	03KK01			14	49.68	1.43	11.29	7.31	-	8.74	0.12	9.38	6	1.29	1.44	2.77	99.45	27.66	165.2	382.17	-	117.47	224.17	957.18	20.17	440.16	26.68	1975.31	54.05	122.33	16.43	68.21	10.35	2.25	6.51	-	4.19	-	1.97	-	1.83	0.28	11.95	1.28	21
Prelević et al. 2010	Macedonia	Vardar Zone	Kuresnicka Krasta	LMP	03KK04			14	49.31	1.37	11.04	7.28	-	8.48	0.12	9.66	6.09	1.55	1.48	2.6	98.98	27.93	166.99	398.66	-	149.25	169.08	986.23	20.52	430.97	25.39	2062.64	54.79	124.21	16.78	70.34	10.59	2.32	6.61	-	4.27	-	2	-	1.77	0.25	11.54	1.24	23
Prelević et al. 2010	Macedonia	Vardar Zone	Mlado Nagoricane	LMP	03MN01	Pliocene	4.5	14	48.12	1.18	12.23	7.91	-	7.81	0.13	9.16	6.96	2	1.6	1.2	98.3	26.55	168.34	392.82	-	266.74	257.24	1054.55	22.64	324.11	21.23	2528.33	35.77	73.58	9.48	40.81	7.4	1.84	6.25	-	4.53	-	2.17	-	2.08	0.31	8.51	1.05	40
Prelević et al. 2010	Macedonia	Vardar Zone	Mlado Nagoricane	LMP	03MN07	Pliocene	4.5	14	48.93	1.18	12.38	7.75	-	7.71	0.14	9.44	6.91	2.28	1.64	0.76	99.12	24.44	167.37	367.38	-	232.85	259.11	1080.45	22.53	307.68	21.21	2579.46	37.59	80.67	10.09	43.17	7.84	1.96	6.27	-	4.55	-	2.27	-	2.05	0.27	8.1	1.05	42
Prelević et al. 2010	Macedonia	Vardar Zone	Mlado Nagoricane	LMP	03MN03			14	48.56	1.13	12.31	7.92	-	7.84	0.14	9.84	6.76	2.52	1.59	0.4	99.01	25.18	151.46	316.08	-	210.23	217.45	1113.38	23.63	314.84	20.3	2462.79	38.32	77.89	10.1	42.86	8.16	1.93	6.37	-	4.68	-	2.36	-	2.09	0.32	8.37	1.01	1.69
Prelević et al. 2010	Macedonia	Vardar Zone	Mlado Nagoricane	LMP	03MN05			14	47.55	1.11	11.6	7.37	-	7.9	0.12	9.91	6.18	1.47	1.57	3.63	98.41	24.86	150.77	364.38	-	208.36	277.93	1185.96	21.27	300.53	19.5	2393.35	34.16	71.46	9.3	40.08	7.38	1.82	5.92	-	4.3	-	2.05	-	1.89	0.28	8.23	1.03	21.2
Prelević et al. 2010	Macedonia	Vardar Zone	Mlado Nagoricane	LMP	03MN07			14	48.93	1.18	12.38	7.75	-	7.71	0.14	9.44	6.91	2.28	1.64	0.76	99.12	24.44	167.37	367.38	-	232.85	259.11	1080.45	22.53	307.68	21.21	2579.46	37.59	80.67	10.09	43.17	7.84	1.96	6.27	-	4.55	-	2.27	-	2.05	0.27	8.1	1.05	7.76
Prelević et al. 2010	Macedonia	Vardar Zone	Mlado Nagoricane	LMP	03MN08			14	48.71	1.17	12.32	7.81	-	7.75	0.13	9.51	6.81	2.35	1.64	0.77	98.97	25.64	167.26	380.58	-	233.04	266.98	1031.26	22.46	307.04	20.82	2421.61	36.44	77.37	9.88	42.45	8.24	1.9	6.29	-	4.39	-	2.19	-	2.12	0.29	8.3	1.09	9.75
Prelević et al. 2010	Macedonia	Vardar Zone	Mlado Nagoricane	LMP	03MN09			14	48.62	1.18	12.25	7.89	-	7.8	0.13	9.38	6.8	2.25	1.63	0.81	98.74	26.28	165.22	419.28	-	220.38	299.95	1040.14	22.24	298.35	19.96	2417.51	35.99	76.25	9.67	42.1	7.91	1.88	6.17	-	4.46	-	2.17	-	1.86	0.31	7.98	0.99	32.54
Prelević et al. 2010	Macedonia	Vardar Zone	Mlado Nagoricane	LMP	03MN01			14	48.12	1.18	12.23	7.91	-	7.81	0.13	9.16	6.96	2	1.6	1.2	98.3	26.55	168.34	392.82	-	266.74	257.24	1054.55	22.64	324.11	21.23	2528.33	35.77	73.58	9.48	40.81	7.4	1.84	6.25	-	4.53	-	2.17	-	2.08	0.31	8.51	1.05	9.31
Prelević et al. 2010	Macedonia	Vardar Zone	Mlado Nagoricane	LMP	03MN02			14	48.48	1.15	12.01	7.74	-	7.65	0.13	10.26	7.17	2.23	1.65	0.48	98.95	25.48	156.3	361.62	-	241.52	243.7	1054.87	22.42	317.07	20.65	2542.4	36.61	76.03	9.68	41.47	7.71	1.86	6.27	-	4.45	-	2.22	-	2.03	0.31	8.45	1.07	14.92
Prelević et al. 2010	Macedonia	Vardar Zone	Mlado Nagoricane	LMP	03MN04			14	48.88	1.15	12.5	7.85	-	7.85	0.14	9.53	6.78	2.41	1.64	0.79	99.52	25.93	165.98	404.75	-	240.61	257.38	1060.7	22.25	315.99	21.26	2440.56	36.16	75.83	9.63	41.67	7.52	1.85	6.05	-	4.48	-	2.2	-	2.1	0.32	8.13	0.99	20.45
Prelević et al. 2010	Macedonia	Vardar Zone	Mlado Nagoricane	LMP	03MN06			14	49.22	1.14	12.56	7.65	-	7.72	0.13	9.33	6.6	2.44	1.58	0.77	99.14	25.5	156.62	380.04	-	213.96	284.39	1027.34	22.58	318.44	20.98	2356.01	35.9	73.94	9.4	40.75	7.57	1.82	6.1	-	4.39	-	2.22	-	2.02	0.29	8.39	1.04	27.47
Prelević et al. 2010	Macedonia	Vardar Zone	Mlado Nagoricane	LMP	03MN10			14	49.75	1.14	12.3	7.53	-	7.54	0.13	9.38	6.73	2.46	1.57	0.65	99.18	24.09	158.18	349.97	-	192.49	247.54	986.8	22.84	300.33	21.09	2295.38	36.48	77.56	9.83	42.23	7.98	2.36	6.1	-	4.42	-	2.28	-	2.07	0.31	7.82	1.1	13.08
Prelević et al. 2010	Macedonia	Vardar Zone	Slavujevac	LMP	04SL01	Pliocene	3.8	15	50.2	0.94	14.71	7.09	-	9.29	0.13	7.52	3.64	3.44	1.04	1.07	99.07	21.64	136.7	165.46	-	151.3	294.41	1178.18	24.91	273.25	22.37	1559.17	56.61	110.16	13.02	51.99	8.33	2.08	6.29	-	4.79	-	2.39	-	2.51	0.37	6.85	1.39	34
Prelević et al. 2010	Macedonia	Vardar Zone	Zebrnjak	LMP	04ZBR01	Pliocene	4.7	14	48.35	1.16	12.06	7.78	-	8.53	0.13	9.9	6.63	2.17	1.65	0.11	98.47	31.45	170.52	421.17	-	275.43	343.55	1105.04	22.26	313.9	22.12	2554.15	37.32	79.6	10.19	43.86	7.96	2.08	6.36	-	4.48	-	2.15	-	2	0.29	8.02	1.06	28
Prelević et al. 2010	Macedonia	Vardar Zone	Zebrnjak	LMP	04ZBR01			14	48.35	1.16	12.06	7.78	-	8.53	0.13	9.9	6.63	2.17	1.65	0.11	98.47	31.45	170.52	421.17	-	275.43	343.55	1105.04	22.26	313.9	22.12	2554.15	37.32	79.6	10.19	43.86	7.96	2.08	6.36	-	4.48	-	2.15	-	2	0.29	8.02	1.06	6.73
Prelević et al. 2010	Macedonia	Vardar Zone	Zebrnjak	LMP	04ZBR02			14	46.55	1.16	11.68	7.74	-	8.21	0.13	10.24	6.22	1.89	1.61	3.79	99.22	31.95	143.38	421.36	-	248.28	251.42	994.78	22.23	295.18	19.69	2435.62	37.55	78.26	10.12	44.37	8.31	2.08	6.73	-	4.72	-	2.2	-	1.95	0.3	7.81	0.98	46.92
Francalanci et al. 2000	Turkey	Western Anatolia	Afyon	LMP	SH24	Miocene		16	50.21	1.42	10.42	3.93	3.01	9.44	-	6.16	7.94	1.38	1.71	3.7	99.32	18	159	159	28	66	199	1213	23	379	26	3242	43	89	-	45	8.6	2.43	-	0.96	-	-	-	-	1.8	-	10.1	1.23	46
Francalanci et al. 2000	Turkey	Western Anatolia	Afyon	LMP	SH21	Miocene		16	51.29	1.64	11.75	1.51	4.97	5.97	-	9.39	6.15	1.77	1.21	3.97	99.62	16	163	518	33	298	198	742	27	648	30	1652	50	109	-	53	9.4	2.27	-	1	-	-	-	-	2.1	-	18.6	1.86	19.4
Ersoy and Helvaci 2007	Turkey	Western Anatolia	Kuzayır	LMP	509/1	Miocene		16	51.21	1.62	12.5	6.24	-	5.83	-	5.6	6.78	1.56	0.96	7.1	99.4	16	164	-	-	58.6	219.9	727.6	23.7	662.7	34.3	1491.8	74	159.6	-	70.9	11.5	2.45	-	1	-	-	-	-	1.82	-	20.2	2.2	-
Ersoy and Helvaci 2007	Turkey	Western Anatolia	Kuzayır	LMP	509/2	Miocene		16	51.47	1.62	12.64	6.22	-	5.83	-	5.63	6.76	1.58	0.96	6.7	99.41	16	173	-	-	58.7	234.3	781.1	25.8	694.3	36.4	1536.6	78.8	173.1	-	73.7	12.5	2.73	-	1.03	-	-	-	-	2.03	-	21.6	2.5	-
Ersoy and Helvaci 2007	Turkey	Western Anatolia	Kuzayır	LMP	518	Miocene		16	53.59	1.76	13.29	5.86	-	5.29	-	6.55	6.83	1.65	1.01	3.8	99.63	19	168	-	-	86.1	222.6	682.1	24.6	748.9	35.2	1483.8	76.5	162.3	-	71.4	11.2	2.66	-	1.01	-	-	-	-	1.73	-	21.1	2.2	-
Ersoy and Helvaci 2007	Turkey	Western Anatolia	Kuzayır	LMP	519	Miocene		16	52.48	1.77	13.05	6.02	-	5.63	-	6.64	6.82	1.58	1.02	4.5	99.51	19	180	-	-	71.2	235.1	726	26.3	778.5	37.2	1586.8	81.4	169.9	-	75.7	11.7	2.84	-	1.03	-	-	-	-	1.93	-	23.2	2.6	-
Innocenti et al. 2005	Turkey	Western Anatolia	Taurides	LMP	IZ41	Miocene		16	54.23	1.54	10.08	2.82	2.87	4.93	-	9.39	7.07	1.49	1.08	2.56	98.06	16	124	535	32	287	225	836	29.2	734	45	1832	51	112	-	58	11	2.31	-	1.14	-	-	-	-	2.12	-	20.2	2.45	16
Akal 2008	Turkey	Western Anatolia	Afyon	LMP	BH114/2	Miocene		16	50.84	1.07	9.38	-	5.94	8.18	0.12	8.01	7.49	1.34	1.41	4.8	98.58	-	101	-	-	258	213.2	1226.2	23.7	360.8	22.4	3428	43.5	83.2	9.35	36.8	8.4	1.59	6.35	0.84	4.54	0.76	2.3	0.27	1.86	0.27	9.4	1.3	31
Akal 2008	Turkey	Western Anatolia	Afyon	LMP	MR107/5	Miocene		16	52.4	1.36	10.01	-	8.72	5.61	0.41	4.29	6.97	1.43	1.62	5.5	98.32	-	142	-	-	58	419.2	1083.1	26.1	469.5	29	3773	48.1	96.9	11.57	46.1	10.1	2.09	7.32	0.99	5.28	0.85	2.55	0.3	2.03	0.29	12.7	1.8	32
Akal 2008	Turkey	Western Anatolia	Afyon	LMP	BH114/5	Miocene		16	50.46	1.07	9.32	-	5.8	9.2	0.19	7.02	7.31	1.42	1.48	5.3	98.57	-	104	-	-	211	538.8	1230.1	22.9	353.3	21.1	3468	41.8	81	9.25	35.7	7.9	1.67	6.01	0.79	4.61	0.69	2.17	0.27	1.81	0.25	9.4	1.3	32
Akal 2008	Turkey	Western Anatolia	Afyon	LMP	MR107/4	Miocene		16	52.42	1.37	9.99	-	8.66	5.94	0.36	4.56	6.52	1.43	1.68	5.4	98.33	-	141	-	-	64	383	1106.8	26.4	455.9	27.9	3784	47.7	98.9	11.65	47.8	9.8	2.18	7.7	0.97	5.46	0.85	2.73	0.3	2.12	0.31	12.6	1.7	32
Akal 2008	Turkey	Western Anatolia	Afyon	LMP	IL106	Miocene		16	51.41	1.35	10.22	-	6.21	8.54	0.18	5.09	7.87	1.55	1.62	4.6	98.64	-	141	-	-	40	266.6	1140.7	25.6	427.9	26	3516	45.3	94.3	11.63	47.1	9.7	2.14	7.43	0.95	5.36	0.81	2.61	0.33	2.13	0.29	11.3	1.5	30
Prelević et al. 2012	Turkey	Western Anatolia	Afyon	LMP	06AF03			16	43.6	1.14	15.38	7	-	10.24	0.14	2.68	9.71	2.21	0.44	5.97	98.51	7.1	190.4		-	19	739.2	3271.2	31.2	740.4	43.8	9349.7	133	223.2	25.1	94	15.5	3.6	10.2	1.2	6.4	1.1	2.9	0.4	2.7	0.4	17.2	2.7	139
Prelević et al. 2012	Turkey	Western Anatolia	Balçıkhisar Şuhut - Afyon	LMP	05 BH 02			16	48.05	1.25	14.03	8.49	-	9.68	0.14	3.85	8.05	1.43	0.81	2.95	98.73	19.1267	232.38	31	-	18.3133	659.88	3540.05	24.9433	595.323	32.7967	5318.38	92.93	162.76	19.2567	75.4333	12.91	3.15333	9.16667	1.06667	5.83667	0.966333	2.53667	0.340333	2.30333	0.339667	16.02	2.03667	63
Prelević et al. 2012	Turkey	Western Anatolia	Balçıkhisar Şuhut - Afyon	LMP	05 BH 04			16	51.12	1.26	10.01	7.83	-	9.01	0.28	4.73	6.81	1.79	1.64	4.7	99.18	-	-	156	-	-	-	-	-	-	-	-	-	-	-	-	-	-	-	-	-	-	-	-	-	-	-	-	40
Prelević et al. 2012	Turkey	Western Anatolia	Balçıkhisar Şuhut - Afyon	LMP	05 BH 05	Miocene	11.4	16	54	1.34	10.86	6.46	-	6.92	0.19	4.97	8.29	1.42	1.73	5.94	102.12	13.64	70.3733	617	-	184.153	110.143	974.787	16.3767	241.997	14.5933	2196.44	28.7667	51.3433	6.13333	25.1933	5.15667	1.26533	4.38667	0.574333	3.39667	0.599333	1.53033	0.217	1.413	0.202	6.48	0.779	40
Prelević et al. 2012	Turkey	Western Anatolia	Balçıkhisar Şuhut - Afyon	SHO	05 BH 03			17	51.92	0.96	16.64	6.43	-	8.32	0.13	4.05	4.65	3.72	0.59	1.5	98.91	-	-	89	-	-	-	-	-	-	-	-	-	-	-	-	-	-	-	-	-	-	-	-	-	-	-	-	40
Prelević et al. 2012	Turkey	Western Anatolia	Ilıcasu	LMP	05 IS 01	Miocene	15.6	16	54.28	1.48	10.28	6.43	-	5.12	0.08	9.13	6.86	1.47	1.16	3.12	99.41	20.7467	135.06	581	-	272.367	253.86	901.533	26.29	697.567	44.31	1852.99	49.12	112.187	11.9367	54.9	9.17667	2.00667	7.14667		4.92333	0.793333	2.04	-	1.95667	0.263333	16.1767	1.96667	14
Prelević et al. 2012	Turkey	Western Anatolia	Ilıcasu	LMP	05 IS 02			16	54.62	1.53	10.41	6.28	-	4.37	0.1	9.17	7.09	1.32	1.19	2.9	98.98	19.56	132.798	537	-	226.868	218.855	946.755	27.52	751.105	46.145	1708.62	52.51	114.582	14.3175	59.245	11.195	2.4375	8.56	1.05875	5.695	0.99675	2.575	0.36575	2.395	0.342	20.435	2.4825	19
Prelević et al. 2012	Turkey	Western Anatolia	Ilıcasu	LMP	06 IS11			16	50.46	0.81	13.16	8.45	-	10.41	0.14	7.34	1.37	2.64	0.16	5.36	100.3	-	-	300	-	-	-	-	-	-	-	-	-	-	-	-	-	-	-	-	-	-	-	-	-	-	-	-	41
Prelević et al. 2012	Turkey	Western Anatolia	Ilyaslı-Afyon	LMP	05 IL 01	Miocene	11.9	16	54.91	1.34	10.92	6.16	-	7.18	0.08	5.06	8.19	1.7	1.83	1.76	99.13	26.68	162.82	170	-	38.845	173.428	1360.14	28.0275	468.74	29.465	3629.58	48.065	93.4875	11.8475	50.6	9.7975	2.345	7.9275	0.99825	5.795	1.0295	2.6	0.37125	2.33	0.3455	12.245	1.56	45
Prelević et al. 2012	Turkey	Western Anatolia	Ilyaslı-Afyon	LMP	05 IL 02	Miocene	11.9	16	52.74	0.96	9.02	6.74	-	10.1	0.12	7.68	7.19	1.44	1.42	2.03	99.44	36.0467	235.593	170	-	83.4767	235.843	1253	35.3833	449	29	5026.16	63.4967	118.527	26.47	65.2633	20.6567	7.93333	16.6367	-	11.7967	3.97333	7.27333	-	6.47667	1.54333	28.9933	6.54667	48
Prelević et al. 2012	Turkey	Western Anatolia	Ilyaslı-Afyon	LMP	05 IL 03			16	50.82	1.24	9.95	7.43	-	9	0.13	6.39	7.51	1.6	1.68	3.92	99.67	-	-	144	-	-	-	-	-	-	-	-	-	-	-	-	-	-	-	-	-	-	-	-	-	-	-	-	45
Prelević et al. 2012	Turkey	Western Anatolia	Iscehisar-Köroğlu	LMP	07imR01	Miocene	16.1	16	55.97	1.54	13.86	6.72	-	5.9	0.15	2.81	6.01	2.26	1.08	3.04	99.34	26.265	129.74	382	-	171.65	163.7	1046.96	33.535	730.725	34.305	2210.41	81.125	141.95	18.115	73.645	12.76	2.8455	9.435	-	6.855	1.189	3.27	-	2.775	0.412	18.385	2.0095	18
Prelević et al. 2012	Turkey	Western Anatolia	Iscehisar-Köroğlu	LMP	07imR02			16	57.62	1.23	14.39	5.54	-	5.73	0.08	3.59	5.92	2.22	0.81	2.17	99.3	20.8067	137.17	179	-	18.7	245.463	939.973	29.32	680.683	37.11	2008.03	68.0867	126.023	15.2467	62.88	11.2467	2.41833	8.45667	-	5.94667	1.035	2.8	-	2.45333	0.364667	17.18	2.51933	22
Prelević et al. 2012	Turkey	Western Anatolia	Iscehisar-Köroğlu	LMP	07imR03			16	56.99	1.32	14.68	5.95	-	5.79	0.08	3.51	5.92	2.32	0.89	2.04	99.49	22.075	129.775	186	-	22.645	150.21	799.585	23.31	500.925	28.525	1817.83	57.325	108.915	13.51	55.93	10.24	2.2175	7.36	-	5.045	0.886	2.3335	-	1.893	0.272	12.595	1.8175	25
Prelević et al. 2012	Turkey	Western Anatolia	Iscehisar-Köroğlu	LMP	07imR05			16	57.07	1.3	14.47	5.87	-	5.95	0.08	3.66	5.86	2.34	0.87	1.8999	99.3699	22.32	139.25	183	-	25.185	192.36	900.175	28.955	660.93	34.775	2159.39	67.365	119.35	15.03	62.505	11.46	2.4065	8.71	-	5.87	1.057	2.89	-	2.2675	0.351	16.95	2.316	25
Prelević et al. 2012	Turkey	Western Anatolia	Iscehisar-Köroğlu	LMP	07imR06	Miocene	16.1	16	57.48	1.24	14.46	5.63	-	5.84	0.08	3.6	5.85	2.24	0.82	2.13	99.37	20.375	133.45	192	-	19.82	169.23	829.42	24.505	507.575	30.965	1867.26	58.46	118.31	13.995	57.13	10.35	2.273	7.4	-	5.175	0.9225	2.425	-	2.115	0.2985	12.885	1.945	23
Prelević et al. 2012	Turkey	Western Anatolia	Karadirek	LMP	05 KD 02			16	61.6	0.59	15.95	4.43	-	3.92	0.09	1.6	6.1	3.03	0.36	1.41	99.08	-		20	-	-	-	-	-	-	-	-	-	-	-	-	-	-	-	-	-	-	-	-	-	-	-	-	52
Prelević et al. 2012	Turkey	Western Anatolia	Karadirek	LMP	05 KD 03	Miocene	11.8	16	53.69	1.18	13.4	8.01	-	8.43	0.1	5.59	5.04	2.15	0.83	1.06	99.48	30.2775	179.64	708	-	114.183	145.042	1048.78	28.06	264.46	20.4825	2687.24	49.4375	95.6925	12.145	50.5425	9.6375	2.23	7.4425	0.965	5.6675	1.007	2.695	0.3765	2.5125	0.37125	7.31	1.2275	25
Prelević et al. 2012	Turkey	Western Anatolia	Karadirek	LMP	05 KD 09			16	58.81	0.83	15.62	5.32	-	4.52	0.06	1.93	6.02	2.75	0.64	2.92	99.42	-		58	-	-	-	-	-	-	-	-	-	-	-	-	-	-	-	-	-	-	-	-	-	-	-	-	-
Prelević et al. 2012	Turkey	Western Anatolia	Karadirek	LMP	05 KD 13			16	55.66	1.24	11.17	5.61	-	8.29	0.09	6.51	6.73	1.7	1.37	1.17	99.54	32.7767	163.62	357	-	65.8933	274.857	1143.67	30.67	412.57	23.0633	2324.17	69.3933	137.82	17.9667	76.99	13.4833	2.94333	9.99	1.18167	6.42333	1.10567	2.81	0.383	2.49333	0.362	10.6267	1.241	39
Prelević et al. 2012	Turkey	Western Anatolia	Karadirek	LMP	06 KD21	Miocene	11.8	16	54.97	1.24	11.06	6.57	-	8.41	0.09	6.26	6.77	1.86	1.37	1.25	99.85	34.0667	170.03	327	-	71.8067	307.613	1193.41	33.9533	479.35	23.0133	2284.03	74.75	146.157	19.07	81.59	14.73	3.17333	10.86	1.29133	7.05667	1.21333	3.25333	0.432333	2.86333	0.402667	12.57	1.45133	25
Prelević et al. 2012	Turkey	Western Anatolia	Karadirek	SHO	05 KD 05			17	58.81	0.87	15.42	5.34	-	5.42	0.09	2.41	5.91	4	0.66	1.24	100.17	18.9133	122.7	66	-	20.7367	182.29	1373.31	27.4933	355.997	25.7833	2316.02	66.6133	115.717	13.55	54.15	9.73333	2.412	7.38667	0.939667	5.40333	1.06767	2.83667	0.405	2.56	0.377333	9.72667	1.78633	40
Prelević et al. 2012	Turkey	Western Anatolia	Karadirek	SHO	05 KD 06			17	63.45	0.56	16.88	3.7	-	2.57	0.04	0.48	6.28	3.53	0.34	1.36	99.19	9.8375	87.725	17	-	7.4625	216.065	1391.06	20.94	368.762	27.64	2181.43	70.11	119.737	13.195	48.19	7.74	2.0025	5.6325	0.717	3.98	0.745	2.0025	0.291	1.94	0.2975	9.7075	2.0275	56
Prelević et al. 2012	Turkey	Western Anatolia	Karadirek	SHO	05 KD 08			17	60.25	0.75	15.88	4.96	-	4.17	0.05	1.49	5.98	4.08	0.53	1.78	99.92	15.5075	110.085	42	-	19.8175	190.407	1340.1	27.3675	342.555	26.99	2447.67	88.2125	118.235	16.7175	64.14	10.6625	2.5225	7.975	0.98875	5.67	1.031	2.6925	0.379	2.5925	0.38675	9.275	1.95525	54
Prelević et al. 2012	Turkey	Western Anatolia	Karadirek	SHO	05 KD 14	Miocene	11.8	17	64.02	0.41	16.66	3.81	-	3.5	0.1	0.88	4.82	4.2	0.19	0.23	98.82	7.24	52.9175	-	-	2.455	141.285	1627.77	19.96	396.93	28.46	1964.87	99.875	180.29	17.84	60.08	8.8175	2.123	5.5025	0.67675	3.7375	0.682	1.9225	0.293	2.095	0.31675	10.17	1.8015	62
Prelević et al. 2012	Turkey	Western Anatolia	Karadirek	SHO	06 KD22			17	60.45	0.79	14.79	4.65	-	4.9	0.09	3.26	5.43	3.34	0.47	1.57	99.74	19.3333	100.56	85	-	29.6033	119.09	1259.72	20.7433	239.26	22.48	1894.22	69.9333	114.913	12.9967	48.8933	8.24667	1.94333	5.97667	0.722333	4.12667	0.754667	2.02	0.301667	2.01	0.312	7.11667	2.09	77
Prelević et al. 2012	Turkey	Western Anatolia	Karadirek	SHO	06 KD23			17	59.06	0.86	15.47	6.1	-	5.15	0.12	2.37	6.04	3.53	0.67	1.32	100.69	17.4175	122.51	58	-	21.375	192.22	1397.72	35.795	359.245	26.0625	2289.59	94.46	129.575	17.23	67.3275	11.4275	2.6475	8.91	1.0945	6.245	1.15775	3.1425	0.45875	2.9575	0.44325	9.6825	2.015	49
Prelević et al. 2012	Turkey	Western Anatolia	Kuzayir	LMP	06 KZ01	Miocene	18.6	16	52.62	1.67	13.03	5.58	-	7.56	0.09	3.59	7.22	2.02	0.91	5.62	99.91	21.1575	159.865	214	-	65.27	197.428	849.51	22.49	680.678	39.535	1445.74	74.82	148.368	17.6725	67.93	11.1175	2.395	7.775	0.918	4.9175	0.85025	2.15	0.301	1.9275	0.29075	19.28	2.65	14
Prelević et al. 2012	Turkey	Western Anatolia	Kuzayir	LMP	06 KZ02			16	52.88	1.76	12.79	6.08	-	5.24	0.07	6.17	6.92	1.74	0.97	5.99	100.61	23.285	144.885	255	-	70.5675	183.11	590.447	22.49	690.435	34.9175	1284.02	68.8075	135.53	16.4725	64.54	10.8	2.305	7.64	0.896	4.83	0.83575	2.18	0.2955	1.9125	0.28325	18.7675	2.3225	15
Prelević et al. 2015	Turkey	Western Anatolia	Afyon	LMP	18			16	48.92	1.44	16.8	8.38	-	6.41	0.17	1.99	9.69	2.6	0.28	1.88	98.56	-	-	-	-	-	-	-	-	-	-	-	-	-	-	-	-	-	-	-	-	-	-	-	-	-	-	-	-
Prelević et al. 2015	Turkey	Western Anatolia	Afyon	LMP	36			16	54.35	1.11	10.32	11.95	-	4.82	1	3.59	8.34	1.44	1.66	0.62	99.2	14.0267	109.147	92.1867	27.3133	31.87	113.71	1153.08	21.24	313.163	26.27	1457.45	88.2333	152.483	16.6133	61.51	9.34667	2.19667	6.43	0.749	4.29667	0.772333	2.02	0.276333	1.85667	0.277333	7.79333	1.65	22.57
Prelević et al. 2015	Turkey	Western Anatolia	Afyon	LMP	42	Miocene	11.4	16	56.37	1.08	19.93	5.77	-	5.09	0.092	2.3	6.11	1.48	0.47	1.07	99.762	13.9533	199.697	1.46	37.51	2.22667	250.023	3246.56	41.6867	961.383	47.5133	5831.7	134.117	249.517	27.9867	103.923	17.17	4.26	12.52	1.55667	8.36667	1.50467	4.08667	0.595	3.91333	0.601667	25.6367	3.18333	138.31
Prelević et al. 2015	Turkey	Western Anatolia	Afyon	LMP	23A	Miocene	11.4	16	57.8	0.98	16.18	5.93	-	3.56	0.07	1.55	9.56	1.97	0.34	1.25	99.19	8.86667	108.347	0.679667	23.1467	17.2567	233.403	2515.89	26.3	595.397	34.4633	4864.55	74.4667	159.347	17.18	63.8167	11.34	3.00667	8.07667	1.03833	5.68333	1.00233	2.65333	0.365	2.34333	0.351333	16.48	2.7	86.95
Prelević et al. 2015	Turkey	Western Anatolia	Afyon	LMP	23B			16	56.19	0.99	15.47	5.94	-	4.38	0.09	1.78	9.61	1.62	0.33	1.54	97.94	8.71	110.647	28.0067	9.01	5.13333	172.837	2241.43	26.75	537.537	29.4433	3699.41	88.53	160.18	17.7367	65.7267	11.2067	2.75	7.85667	0.976	5.29333	0.941667	2.47	0.334667	2.24667	0.342333	14.8967	2.05	56.5133
Prelević et al. 2015	Turkey	Western Anatolia	Afyon	LMP	23C			16	56.35	0.98	15.61	5.72	-	5.17	0.09	1.7	9.48	1.68	0.33	2.26	99.37	9.53667	156.187	5.72333	31.5433	9.62667	180.747	2443.41	30.08	661.627	32.1	4519.8	111.02	185.78	20.9033	76.8433	12.5433	3.18667	9.07333	1.15	6.04	1.08733	2.84333	0.401	2.57667	0.375667	18.0433	2.29667	59.1367
Prelević et al. 2015	Turkey	Western Anatolia	Afyon	LMP	53A	Miocene	11.4	16	56.27	0.74	19.68	4.61	-	5.13	0.08	1.63	6.31	2.84	0.31	2.1	99.7	4.82333	99.52	54.5233	8.89	28.7933	132.107	2506.63	23.63	393.32	42.2367	2328.11	153.23	241.163	25.0533	86.2967	11.57	2.81	7.31333	0.846333	4.35667	0.808	2.24667	0.333333	2.25667	0.333333	8.15667	2.54667	30.0333
Prelević et al. 2015	Turkey	Western Anatolia	Afyon	LMP	05 BH 02			16	48.05	1.25	14.03	8.49	-	9.68	0.14	3.85	8.05	1.43	0.81	2.95	98.73	19.1267	232.38	31	-	23	659.88	3540.05	24.9433	595.323	32.7967	5318.38	92.93	162.76	19.2567	75.4333	12.91	3.15333	9.16667	1.06667	5.83667	0.966333	2.53667	0.340333	2.30333	0.339667	16.02	2.03667	63
Prelević et al. 2015	Turkey	Western Anatolia	Afyon	LMP	05 BH 04			16	51.12	1.26	10.01	7.83	-	9.01	0.28	4.73	6.81	1.79	1.64	4.7	99.18	25	151	156	-	46	858	1195	17	422	25	4325	-	-	-	-	-	-	-	-	-	-	-	-	-	-	-	-	40
Prelević et al. 2015	Turkey	Western Anatolia	Afyon	LMP	05 BH 05	Miocene	11.9	16	54	1.34	10.86	6.46	-	6.92	0.19	4.97	8.29	1.42	1.73	5.94	102.12	13.64	70.3733	617	-	291	110.143	974.787	16.3767	241.997	14.5933	2196.44	28.7667	51.3433	6.13333	25.1933	5.15667	1.26533	4.38667	0.574333	3.39667	0.599333	1.53033	0.217	1.413	0.202	6.48	0.779	40
Prelević et al. 2015	Turkey	Western Anatolia	Afyon	LMP	05 IL 01	Miocene	11.9	16	54.91	1.34	10.92	6.16	-	7.18	0.08	5.06	8.19	1.7	1.83	1.76	99.13	23	167	170	-	41	208	1287	29	456	30	3942	-	-	-	-	-	-	-	-	-	-	-	-	-	-	-	-	45
Prelević et al. 2015	Turkey	Western Anatolia	Afyon	LMP	05 IL 02	Miocene	11.9	16	49.74	0.96	9.02	6.74	-	10.1	0.12	7.68	7.19	1.44	1.42	2.03	96.44	25	163	170	-	51	201	1253	26	449	29	4145	-	-	-	-	-	-	-	-	-	-	-	-	-	-	-	-	48
Prelević et al. 2015	Turkey	Western Anatolia	Afyon	LMP	05 IL 03			16	50.82	1.24	9.95	7.43	-	9	0.13	6.39	7.51	1.6	1.68	3.92	99.67	22	135	144	-	63	194	1204	24	408	27	3399	-	-	-	-	-	-	-	-	-	-	-	-	-	-	-	-	45
Prelević et al. 2015	Turkey	Western Anatolia	Afyon	LMP	05 IL 04			16	51.61	1.2	9.8	9.36	-	6.07	0.61	3.86	6.49	1.78	1.9	6.15	98.83	22	149	171	-	58	514	1079	21	434	27	4683	-	-	-	-	-	-	-	-	-	-	-	-	-	-	-	-	42
Prelević et al. 2015	Turkey	Western Anatolia	Afyon	LMP	107/4	Miocene	11.9	16	52.42	1.37	9.99	9.62	-	5.94	0.36	4.56	6.52	1.43	1.68	5.4	99.29	22	141	-	-	64	383	1106.8	26.4	455.9	27.9	3784	47.7	98.9	11.65	47.8	9.8	2.18	7.7	0.97	5.46	0.85	2.73	0.3	2.12	0.31	12.6	1.7	32
Prelević et al. 2015	Turkey	Western Anatolia	Afyon	LMP	107/5	Miocene	11.9	16	52.4	1.36	10.01	9.69	-	5.61	0.41	4.29	6.97	1.43	1.62	5.5	99.29	21	142	-	-	58	419.2	1083.1	26.1	469.5	29	3773	48.1	96.9	11.57	46.1	10.1	2.09	7.32	0.99	5.28	0.85	2.55	0.3	2.03	0.29	12.7	1.8	32
Prelević et al. 2015	Turkey	Western Anatolia	Afyon	LMP	114/2	Miocene	11.4	16	50.84	1.07	9.38	6.6	-	8.18	0.12	8.01	7.49	1.34	1.41	4.8	99.24	17	101	-	-	258	213.2	1226.2	23.7	360.8	22.4	3428	43.5	83.2	9.35	36.8	8.4	1.59	6.35	0.84	4.54	0.76	2.3	0.27	1.86	0.27	9.4	1.3	31
Prelević et al. 2015	Turkey	Western Anatolia	Afyon	LMP	114/5	Miocene	11.4	16	50.46	1.07	9.32	6.45	-	9.2	0.19	7.02	7.31	1.42	1.48	5.3	99.22	17	104	-	-	211	538.8	1230.1	22.9	353.3	21.1	3468	41.8	81	9.25	35.7	7.9	1.67	6.01	0.79	4.61	0.69	2.17	0.27	1.81	0.25	9.4	1.3	32
Prelević et al. 2015	Turkey	Western Anatolia	Afyon	LMP	90	Miocene	11.9	16	50.65	1.36	10.03	9.39	-	8.36	0.13	10.82	7.81	1.31	1.56	4.7	106.12	21	141	-	-	48	194.6	1168.7	25.8	440.5	26.9	3437	45.2	94.7	11.7	47.8	10.1	2.04	7.3	0.96	5.2	0.83	2.51	0.32	2.04	0.3	11.9	1.6	33
Prelević et al. 2015	Turkey	Western Anatolia	Afyon	LMP	106	Miocene	11.9	16	51.41	1.35	10.22	6.9	-	8.54	0.18	5.09	7.87	1.55	1.62	4.6	99.33	22	141	-	-	40	266.6	1140.7	25.6	427.9	26	3516	45.3	94.3	11.63	47.1	9.7	2.14	7.43	0.95	5.36	0.81	2.61	0.33	2.13	0.29	11.3	1.5	30
Prelević et al. 2015	Turkey	Western Anatolia	Afyon	SHO	25C			17	59.02	0.83	14.78	5.41	-	4.77	0.08	2.48	4.56	3.38	0.5	3.92	99.73	-	111	755	-	301	226	1096	28	371	24	-	32	54	-	26	-	-	-	-	-	-	-	-	-	-	-	-	35
Prelević et al. 2015	Turkey	Western Anatolia	Afyon	SHO	27B	Miocene	11.4	17	54.45	0.95	17.42	5.87	-	6.69	0.07	3.37	3.94	4.03	0.54	1.54	98.87	14.3233	122.243	76.1567	16.8267	40.4133	219.983	1857.83	20.5367	272.407	24.61	1739.34	107.737	183.657	20.0333	73.6367	11.2033	2.64	7.60667	0.826667	4.21333	0.732333	1.95667	0.258667	1.58333	0.239	6.75	1.55	36.8233
Prelević et al. 2015	Turkey	Western Anatolia	Afyon	SHO	27C			17	54.71	0.96	17.83	5.73	-	6.7	0.08	3.38	3.16	4.69	0.54	1.68	99.46	12.55	116.963	44.36	24.21	33.0333	417.04	2144.01	21.32	338.18	30.2367	2204.96	125.22	212.47	22.41	80.2267	12.0833	2.92333	7.87333	0.874333	4.44333	0.779667	2.03333	0.277333	1.77	0.261	7.91667	1.82	36.9367
Prelević et al. 2015	Turkey	Western Anatolia	Afyon	SHO	43			17	54.78	0.86	18.78	5.84	-	6.04	0.1	2.7	4.48	4.01	0.52	1.25	99.36	11.1233	127.5	10.2733	22.03	7.3	48.46	2282.97	25.9367	465.367	50.8967	1983.59	144.457	235.34	25.3067	89.2167	12.65	3.16333	8.22667	0.915667	5.01333	0.951667	2.48333	0.344333	2.46	0.357333	10.56	2.98	22.08
Prelević et al. 2015	Turkey	Western Anatolia	Afyon	SHO	31	Miocene	11.4	17	52.81	0.91	16.77	5.89	-	6.47	0.11	3.77	5.37	3.41	0.51	2.13	98.15	12.6467	131.013	56.0233	32.54	37.77	114.027	1671.99	23.1767	446.33	34.61	2373.84	124.947	212.937	22.1567	79.67	11.9533	2.93333	7.71333	0.888	4.53667	0.809667	2.15667	0.321	2.09333	0.305	9.51667	2.11667	53.95
Prelević et al. 2015	Turkey	Western Anatolia	Afyon	SHO	28A	Miocene	11.4	17	59.25	0.11	21.21	2.08	-	0.94	0.14	0.11	5.76	9.27	0.01	1.12	100	2.34	11.1833	0.466333	32.5133	0.389667	374.02	30.5333	7.39667	982.75	56.6633	56.26	145.833	175.727	12.52	27.6	2.07667	0.246	1.102	0.123	0.765667	0.153667	0.603	0.124667	1.14367	0.221333	16.95	1.14433	72.2167
Prelević et al. 2015	Turkey	Western Anatolia	Afyon	SHO	28B	Miocene	11.4	17	58.9	0.11	21.07	2.09	-	1.15	0.14	0.18	5.69	9.68	0.01	1.2	100.22	2.19333	14.7767	50.6933	0.651333	1.248	339.083	58.3333	7.90333	1017.98	56.6267	28.22	136.72	167.753	11.7267	26.28	1.99667	0.248	1.17467	0.132333	0.766333	0.158333	0.614333	0.139667	1.23367	0.239333	17.93	1.16333	71.1
Prelević et al. 2015	Turkey	Western Anatolia	Afyon	SHO	53B			17	55.5	0.75	19.48	4.94	-	5.32	0.09	1.76	5.89	2.96	0.32	2.22	99.23	5.04667	103.583	4.18	59.8333	4.82667	127.153	2268.23	24.43	398.693	43.7467	1977.51	133.927	221.317	23.1233	82.0667	11.28	2.74667	7.11667	0.855667	4.46333	0.818	2.28667	0.335	2.24667	0.343	8.61	2.71667	26.4
Prelević et al. 2015	Turkey	Western Anatolia	Afyon	SHO	05 BH 03			17	51.92	0.96	16.64	6.43	-	8.32	0.13	4.05	4.65	3.72	0.59	1.5	98.91	12	139	89	-	34	194	2185	25	379	42	2782	-	-	-	-	-	-	-	-	-	-	-	-	-	-	-	-	40
Prelević et al. 2015	Turkey	Western Anatolia	Afyon	SHO	49			17	59.39	0.93	15.3	5.87	-	4.61	0.08	3.41	5.86	3.81	0.58	0.57	100.41	-	-	-	-	-	-	-	-	-	-	-	-	-	-	-	-	-	-	-	-	-	-	-	-	-	-	-	-
Prelević et al. 2015	Turkey	Western Anatolia	Afyon	SHO	50	Miocene	11.4	17	56.17	1.48	14.69	7.32	-	5.76	0.08	3.8	6.57	2.72	0.95	0.49	100.03	25.5867	179.04	311.563	34.34	78.55	189.673	1048.8	22.9267	460.263	26.5033	1503.22	80.8933	150.557	18.6967	73.28	11.52	2.65667	7.98667	0.939667	4.87333	0.86	2.19667	0.307333	2.07667	0.295	12.4367	1.84333	16.39
Prelević et al. 2015	Turkey	Western Anatolia	Afyon	SHO	51			17	56.81	1.27	13.47	6.81	-	6.27	0.07	4.22	6.44	2.78	1.05	0.67	99.86	22.2533	124.793	239.89	33.46	45.9333	124.937	1118.1	26.38	327.38	20.9333	1464.84	99.07	178.93	21.3733	83.3967	13.64	2.85	9.38667	1.08067	5.68333	0.984	2.44	0.325	2.10333	0.297	9.00667	1.48067	31.94
Prelević et al. 2015	Turkey	Western Anatolia	Afyon	SHO	48A			17	60.13	0.92	14.44	5.02	-	4.88	0.09	3.51	6.21	3.68	0.7	0.22	99.8	-	-	-	-	-	-	-	-	-	-	-	-	-	-	-	-	-	-	-	-	-	-	-	-	-	-	-	-
Prelević et al. 2015	Turkey	Western Anatolia	Afyon	SHO	48B			17	57.65	0.96	16.19	5.6	-	4.67	0.08	2.28	5.29	4.14	0.56	0.45	97.87	12.6833	103.233	97.6233	31.6133	28.11	139.07	1281.8	19.4	252.083	35.0267	1180.72	95.1933	169.237	18.2467	68.25	10.67	2.48667	6.97	0.786333	4.09	0.692667	1.78667	0.249333	1.69667	0.242667	7.49	2.46667	16.7933
Prelević et al. 2015	Turkey	Western Anatolia	Afyon	SHO	48C			17	56.31	1.42	14.36	6.47	-	6.22	0.07	4.07	6.48	3.11	0.95	0.87	100.33	24.0133	180.467	295.677	18.3833	67.2867	192.797	1093.13	24.5233	496.147	28.0067	1501.34	79.6067	153.837	18.15	72.6733	11.8567	2.68667	8.37667	0.932	5.16667	0.891	2.36	0.310667	2.07	0.288667	13.5933	1.96667	11.4533
Prelević et al. 2015	Turkey	Western Anatolia	Afyon	SHO	40A			17	61.81	0.7	16.17	5.14	-	4.44	0.09	2.12	4.89	3.8	0.47	0.45	100.08	11.0867	86.3833	30.5633	35.0867	11.9433	157.233	1102.94	21.6967	265.457	26.9833	1270.14	76.4533	140.35	15.34	56.2867	8.71333	2.013	6.02	0.744333	4.24333	0.748333	2.05667	0.3	1.99667	0.291333	7.08667	2.14667	45.9833
Prelević et al. 2015	Turkey	Western Anatolia	Afyon	SHO	40B			17	53.32	1.16	17.74	8	-	6.77	0.13	3.77	3.93	3.31	0.73	0.79	99.65	18.84	140.037	9.12	30.4033	6.97333	105.72	1426.57	29.5467	227.703	26.4	1630.11	96	182.29	21.0233	80.33	12.1833	2.73	8.89	1.06667	5.94667	1.091	2.89333	0.395667	2.70333	0.394667	6.71333	1.86667	24.8733
Prelević et al. 2015	Turkey	Western Anatolia	Afyon	SHO	37A			17	62.8	0.86	17.55	4.13	-	1.63	0	1.41	5.6	3.35	0.46	1.81	99.6	-	-	-	-	-	-	-	-	-	-	-	-	-	-	-	-	-	-	-	-	-	-	-	-	-	-	-	-
Prelević et al. 2015	Turkey	Western Anatolia	Afyon	SHO	66B	Miocene	11.4	17	47.05	1.28	21.95	6.65	-	7.98	0.127	6	4.26	2.93	1.06	0.6	99.887	19.0933	187.58	21.4	41.9167	34.56	206.617	3777.89	48.5167	330.243	99.7233	2835.23	331.337	582.76	63.6433	236.387	35.2867	8.25667	21.7233	2.35	11.0667	1.81667	4.25333	0.527333	3.23	0.457	9.29333	6.37	49.4833
Prelević et al. 2015	Turkey	Western Anatolia	Afyon	SHO	73A			17	58.04	0.99	19.48	4.18	-	5.73	0.07	3	4.38	2.5	0.72	0.63	99.72	22.6367	202.857	88.8533	47.9733	32.47	417.66	2301.18	29.6533	443.66	39.9033	4173.9	116.857	203.967	21.6633	83.1667	13.19	3.81667	9.52	1.16	6.39667	1.13	2.89333	0.42	2.60333	0.388667	12.68	3.06667	67.1133
Prelević et al. 2015	Turkey	Western Anatolia	Afyon	SHO	74			17	55.97	0.85	19.7	4.62	-	6.27	0.065	3.91	4.53	2.55	0.66	0.68	99.805	25.8633	230.407	305.163	35.79	47.0633	391.35	1713.41	34.9367	694.887	55.0033	3304.68	124.34	213.507	22.6867	82.51	13.2467	3.12	9.76333	1.21667	6.76	1.3	3.38	0.497333	3.37	0.528667	21.1833	4.70333	81.1067
Prelević et al. 2015	Turkey	Western Anatolia	Afyon	SHO	78			17	53.58	0.9	21.27	5.51	-	6.2	0.101	3.85	4.51	2.88	0.63	0.34	99.771	21.4033	162.03	77.0167	36.0733	24.5133	291.557	2028	36.2567	999.297	37.14	3010.87	112.243	199.787	21.6333	83.86	13.97	3.30667	10.07	1.24333	7.22	1.32333	3.57667	0.512	3.63333	0.528667	24.74	3.18	59.81
Prelević et al. 2015	Turkey	Western Anatolia	Afyon	SHO	79			17	55.54	0.99	20.04	5.51	-	5.73	0.07	3.72	4.14	2.48	0.79	0.52	99.53	22.65	239.597	96.9033	67.7767	38.71	320.727	2222.43	56.7967	813.687	79.4333	3499.25	119.843	232.243	27.37	110.65	21.01	3.85667	15.9	2.09667	12.3633	2.18	6.03	0.841333	5.74667	0.834333	21.1467	7.06333	49.6367
Prelević et al. 2015	Turkey	Western Anatolia	Afyon	SHO	80			17	55.67	0.94	20.38	5.51	-	5.8	0.07	3.05	4.21	2.79	0.63	0.51	99.56	27.63	563.027	245.027	61.5833	57.6633	282.863	1355.56	24.2233	207.19	31.64	1954.1	66.52	113.557	12.3767	47.2867	8.38667	2.35667	6.24	0.836667	4.68	0.871	2.4	0.330667	2.29667	0.344	6.73667	2.37	61.5567
Prelević et al. 2015	Turkey	Western Anatolia	Afyon	SHO	83			17	55.86	1.17	23.3	6.21	-	3.13	0.025	1.07	4.48	3.15	0.66	0.64	99.695	19.89	205.937	92.2567	50.69	31.4	205.01	2548.88	28.71	224.193	36.2467	3267.76	158.383	283.98	30.2467	113.49	17.3733	4.02667	11.0533	1.24	6.41667	1.08333	2.66	0.348	2.26333	0.319333	6.63667	2.76667	57.1867
Prelević et al. 2015	Turkey	Western Anatolia	Afyon	SHO	84	Miocene	11.4	17	60.57	1.12	21.84	4.27	-	2.92	0.012	0.81	3.87	3.07	0.55	0.94	99.972	22.9967	204.207	200.2	53.36	32.5067	240.22	2086.43	23.04	189.737	41.0333	2905.24	104.687	186.403	20.48	80.9	13.84	3.38	9.47	1.13333	5.64667	0.930667	2.28333	0.277333	1.91	0.255333	6.48333	2.91667	51.4367
Prelević et al. 2015	Turkey	Western Anatolia	Afyon	SHO	93			17	56.78	1.08	19.81	4.36	-	5.88	0.056	3.15	4.69	2.6	0.72	0.56	99.686	24.8367	179.17	169.64	14.4233	27.98	301.49	1936.31	28.85	315.243	27.3533	3242.39	101.963	178.513	19.1767	74.6567	12.4767	3.26667	9.18	1.09	6.12667	1.06667	2.77	0.400333	2.59667	0.351667	9.46667	2.18333	69.49
Prelević et al. 2015	Turkey	Western Anatolia	Afyon	SHO	94			17	55.27	1.03	19.81	4.45	-	6.8	0.07	4.22	4.42	2.57	0.61	0.62	99.87	24.7333	186.22	205.213	16.8833	40.3667	378.687	2044.57	34.8233	532.507	41.5833	3595.22	138.96	247.523	25.8067	93.8567	14.85	3.62667	10.3167	1.24	6.86	1.26333	3.47	0.490667	3.29	0.472333	14.9	3.19667	64.7367
Prelević et al. 2015	Turkey	Western Anatolia	Afyon	SHO	96			17	52.66	1.21	20.82	5.51	-	6.87	0.083	4.66	4.7	2.69	0.66	0.35	100.213	26.16	220.127	115.997	46.9933	38.2167	335.42	2080.52	38.2167	574.923	50.8067	3642.76	119.887	216.2	23.8067	92.1533	15.35	3.68333	11.7367	1.39667	7.74	1.38	3.69	0.538333	3.5	0.492	16.2167	4.06	31.4867
Prelević et al. 2015	Turkey	Western Anatolia	Afyon	SHO	97	Miocene	11.4	17	52.12	1.08	20.15	5.68	-	7.8	0.101	5.66	3.49	2.88	0.53	0.45	99.941	24.7367	160.883	89.7933	37.7933	43.2567	148.227	1780.03	35.2233	275.37	38.3767	1883.17	139.373	236.883	25.4633	96.0867	14.7467	3.46667	10.2333	1.21667	6.79667	1.21667	3.20667	0.457333	3.06667	0.436667	7.53	2.67333	24.2933
Prelević et al. 2015	Turkey	Western Anatolia	Afyon	SHO	60	Miocene	11.4	17	48.39	0.72	20.82	5.86	-	10.53	0.136	7.1	3.72	1.47	0.47	0.39	99.606	23.5667	177.107	167.497	67.4133	40.4467	231.817	3647.13	35.5567	575.227	58.9533	2833.58	244.463	397.287	40.81	147.193	21.6167	5.25667	12.86	1.38333	7.10667	1.22333	3.33	0.479667	3.38	0.507333	13.4	3.31667	37.03
Prelević et al. 2015	Turkey	Western Anatolia	Afyon	SHO	10			17	51.13	1	16.74	6.58	-	8.25	0.12	4.33	4.52	3.86	0.62	1.28	98.43	13.4667	111.147	87.3667	33.42	26.3333	306	2272.01	21.0967	306.047	33.2333	2434.76	131.417	213.923	22.0467	78.8467	11.3933	3.01667	7.31333	0.867667	4.3	0.770667	1.97333	0.261	1.75333	0.258	7.13667	1.90333	30.79
Prelević et al. 2015	Turkey	Western Anatolia	Afyon	SHO	13			17	51.26	1.01	17.58	6.82	-	7.79	0.13	3.6	4.99	4.48	0.71	0.96	99.33	11.91	148.95	19.4367	40.02	14.9633	115.217	2332.23	27.9267	380.067	40.49	2389.07	169.37	292.953	31.8033	114.853	16.49	3.83333	10.4367	1.16633	6.01667	1.06	2.64667	0.371667	2.35333	0.354	8.76	2.52333	15.68
Prelević et al. 2015	Turkey	Western Anatolia	Afyon	SHO	21			17	52.2	1.01	17.83	6.77	-	7.22	0.12	3.42	5.04	4.29	0.71	0.7	99.31	10.9833	157.527	22.6167	45.3633	16.6633	564.703	2168.88	27.88	353.043	38.2367	2117.45	173.397	305.57	32.5	116.85	16.62	3.78333	10.4267	1.137	5.94333	1.02433	2.5	0.356333	2.29333	0.340333	8.25333	2.31667	30.77
Prelević et al. 2015	Turkey	Western Anatolia	Afyon	SHO	33			17	51.78	1	16.91	6.47	-	8.2	0.12	4.43	5.06	3.87	0.63	0.92	99.39	14.7867	145.687	75.2367	33.4367	32.1767	246.87	1891.71	24.82	369.063	38.2233	2018.85	140.64	238.423	25.54	91.3867	13.46	3.08667	8.6	0.970667	5.27333	0.879667	2.43333	0.327	2.18	0.311	8.38	2.27	30.4467
Prelević et al. 2015	Turkey	Western Anatolia	Afyon	SHO	14A			17	51.39	1.03	17.55	6.91	-	7.57	0.13	3.6	5.1	4.38	0.72	0.7	99.08	12.3733	164.613	31.7733	47.2367	16.7133	127.947	2227.63	27.2733	378.543	41.4633	2255.98	164.89	289.28	30.6967	111.037	16.1833	3.71	10.2767	1.14233	5.90333	0.981333	2.55333	0.338667	2.27333	0.351667	8.75667	2.50333	23.5233
Prelević et al. 2015	Turkey	Western Anatolia	Afyon	SHO	14B			17	51.84	1	17.86	6.74	-	7.66	0.12	3.52	5.07	4.38	0.71	0.83	99.73	10.7067	123.09	21.3833	30.4967	13.7367	138.573	2587.27	25.23	395.547	39.9967	2617.82	168.083	287.013	30.0167	104.32	15.0433	3.83	9.55	1.02167	5.43	0.911333	2.47	0.334667	2.19333	0.325333	8.95667	2.45	18.6067
Prelević et al. 2015	Turkey	Western Anatolia	Afyon	SHO	24A			17	51.98	0.98	17.31	6.69	-	7.81	0.12	3.8	4.99	4.2	0.66	0.75	99.29	13.0933	138.55	41.62	50.18	20.1267	114.373	2243.22	28.1833	406.807	40.7967	2270.28	167.49	281.723	30.15	109.447	15.8867	3.73	10.2233	1.15667	6.02	1.03067	2.73	0.369333	2.43667	0.345333	9.54	2.62	24.6433
Prelević et al. 2015	Turkey	Western Anatolia	Afyon	SHO	11			17	52.49	1.03	18.04	6.8	-	6.98	0.12	3.26	5.32	3.42	0.72	1.02	99.2	11.01	146.12	18.67	56.4633	12.5533	153.187	2528.11	30.66	391.377	40.4733	2342.35	180.22	299.293	32.4967	117.487	17.1167	3.83	10.9867	1.17267	5.98667	1.03167	2.71	0.366	2.31333	0.354333	9.07333	2.56333	28.3167
Prelević et al. 2015	Turkey	Western Anatolia	Afyon	SHO	29	Miocene	11.4	17	48.71	1	14.57	7.1	-	10.86	0.11	6.29	3.97	2.87	0.68	1.28	97.44	19.2333	154.633	202.693	39.1	48.3267	202.52	2848.76	25.8067	309.393	29.4067	2388.62	173.96	304.783	33.5333	125.377	17.7367	4.33	11.16	1.10333	5.50667	0.921333	2.26	0.304	1.81333	0.272	7.53667	1.79333	10.3433
Prelević et al. 2015	Turkey	Western Anatolia	Afyon	SHO	06 AF 02			17	49.17	1.16	16.8	7.43	-	9.78	0.11	4.3	2.31	3.31	0.52	5.27	100.16	8	128	56	34	39	138	2003	22	318	38	2129	114.17	188.12	20.9975	77.52	11.75	2.8	7.6975	0.8905	4.905	0.86125	2.1875	0.32	2.0775	0.28975	6.6925	2.1825	37
Prelević et al. 2015	Turkey	Western Anatolia	Afyon	SHO	30			17	57.18	0.84	14.39	5.7	-	7.31	0.08	4.65	4.93	3.76	0.56	0.21	99.61	16.7233	127.817	196.373	18.0767	39.5567	147.94	2363.06	21.09	225.67	27.8933	2016.09	126.94	224.393	25.2133	95.8833	14.0733	3.75	8.38333	0.863	4.53	0.776667	1.92333	0.278333	1.75333	0.258	5.74	1.87333	11.21
Prelević et al. 2015	Turkey	Western Anatolia	Afyon	SHO	55			17	40.84	1.17	21.27	6.39	-	13.63	0.136	7.22	3.43	3.24	0.67	1.25	99.246	23.7767	233.843	137.357	69.0167	57.0967	215.333	2838.56	38.2833	576.457	60.85	2948	215.667	372.747	39.22	143.29	21.1967	4.89333	13.6833	1.54667	7.68	1.37	3.46333	0.499	3.42333	0.477667	12.8167	3.6	41.67
Prelević et al. 2015	Turkey	Western Anatolia	Afyon	SHO	64			17	54.11	1.08	21.39	5.77	-	4.98	0.096	2.27	6.01	1.48	0.36	1.25	98.796	14.2633	229.097	30.7233	15.36	3.43333	281.577	3606.52	38.2967	1118.82	49.8767	6634.18	115.11	240.013	24.4667	91.3033	15.56	3.85333	11.2633	1.43333	7.86333	1.42667	3.80333	0.538333	3.77333	0.547	30.1533	3.44	122.127
Prelević et al. 2015	Turkey	Western Anatolia	Afyon	SHO	40C	Miocene	14.23	17	53.25	0.97	16.55	7.83	-	7.82	0.14	5.04	3.95	2.91	0.73	0.74	99.93	21.4333	145.357	133.313	37.9767	38.8633	128.307	1481.16	23.1633	237.877	22.06	1620.68	87.23	158.203	17.6467	66.6967	10.4067	2.36333	7.1	0.850667	4.77	0.819333	2.20667	0.298333	2.06667	0.300333	6.50667	1.38	20.3433
Gao et al. 2007	China	West Lhasa Terrane	Tibetan Plateau	LMP	Tl/10	Miocene		19	53.33	1.68	10.87	2.64	3.22	6.69	-	8.13	4.47	2.22	0.97	4.57	98.79	17.3	131.3	370	27.6	236.9	790	1421	25	974	47.3	3340	200	452	-	218.7	31.2	5.47	-	1.57	-	-	-	-	1.65	-	26.32	2.5	127.5
Gao et al. 2007	China	West Lhasa Terrane	Tibetan Plateau	LMP	Tl/11	Miocene		19	54	1.62	11.09	3.59	2.22	6.83	-	7.74	7.33	1.33	0.76	2.37	98.88	16.9	128	368.6	26.6	226.9	550	1564	25.2	994	48.8	3931	200	456	-	217.1	31	5.47	-	1.56	-	-	-	-	1.65	-	26.45	2.5	128.5
Gao et al. 2007	China	West Lhasa Terrane	Tibetan Plateau	LMP	Tl/18	Miocene		19	56.72	1.58	13.4	3.34	2.42	5.27	-	5.13	8.02	2.08	0.67	0.61	99.24	15	124.3	239.1	19.3	132.3	576	1196	25.4	784	34	2531	138	337	-	196.1	32	4.93	-	1.51	-	-	-	-	1.74	-	21.72	1.89	85.2
Gao et al. 2007	China	West Lhasa Terrane	Tibetan Plateau	LMP	Tl/13	Miocene		19	54.36	1.45	12.18	4.59	1.68	6.74	-	6.34	6.99	2.29	0.87	1.37	98.86	17.6	119.7	320.9	24.5	174.8	391	1633	25.8	862	34.9	3452	165	364	-	168.6	24.6	4.73	-	1.4	-	-	-	-	1.87	-	23.27	1.83	107.7
Gao et al. 2007	China	West Lhasa Terrane	Tibetan Plateau	LMP	Tl/03	Miocene		19	54.72	1.43	11.53	5.05	1.58	7.06	-	6.6	6.34	2.26	0.9	1.66	99.13	20.3	140	342.8	32.7	187.9	611	1260	23.9	783	46.4	3051	154	359	-	182.8	28.2	4.6	-	1.41	-	-	-	-	1.69	-	21.01	2.49	101.5
Gao et al. 2007	China	West Lhasa Terrane	Tibetan Plateau	LMP	Tl/08	Miocene		19	56.64	1.61	13.49	4.56	1.4	5.42	-	4.65	8.05	2.04	0.69	0.56	99.11	14.8	114.3	239.2	22.1	124.5	598	1207	24.1	787	34.5	2537	133	329	-	189.6	30.8	4.8	-	1.44	-	-	-	-	1.7	-	21.63	1.89	89.4
Gao et al. 2007	China	West Lhasa Terrane	Tibetan Plateau	LMP	Tl/17	Miocene		19	60.7	1.06	13.29	2.37	1.98	4.04	-	3.47	8.21	2.78	0.7	0.46	99.06	19.5	122.3	564.6	36.2	338.6	939	1004	28.6	966	54.2	2835	156	397	-	241.3	42.7	5.93	-	1.89	-	-	-	-	1.88	-	27.02	2.9	101.2
Gao et al. 2007	China	West Lhasa Terrane	Tibetan Plateau	LMP	CHZ-1	Miocene		19	54.28	1.6	12.82	3.39	2.95	6.48	-	5.66	8.1	1.59	1.22	0.84	98.93	18.8	136	313	25.9	186	880	810	36.1	1101	73.2	2989	139	351	-	244	46.4	6.83	-	2.43	-	-	-	-	2.43	-	30.1	4.06	166
Gao et al. 2007	China	West Lhasa Terrane	Tibetan Plateau	LMP	CHZ-2	Miocene		19	54.42	1.62	12.75	3.29	2.85	6.48	-	5.87	7.92	1.79	1.22	0.8	99.01	18.3	137	299	24.1	176	702	798	34.9	893	68.5	2939	138	352	-	247	45.7	6.72	-	2.43	-	-	-	-	2.36	-	25	3.9	116
Gao et al. 2007	China	West Lhasa Terrane	Tibetan Plateau	LMP	CHZ-3	Miocene		19	55.2	1.66	12.98	2.69	3.48	6.1	-	5.71	8.29	1.66	1.06	0.28	99.11	18.5	141	286	23.8	158	784	704	32.2	806	66.3	2498	139	334	-	231	42.9	6.2	-	2.2	-	-	-	-	2.27	-	23.3	3.77	81.2
Gao et al. 2007	China	West Lhasa Terrane	Tibetan Plateau	LMP	CHZ-4	Miocene		19	54.18	1.53	13.59	2.7	3.88	6.54	-	5.95	7.5	1.61	0.93	0.66	99.07	18.6	147	297	24.8	172	712	660	29.6	834	54.9	2134	123	290	-	199	36.8	5.36	-	1.97	-	-	-	-	2.13	-	22.8	3.21	82.4
Gao et al. 2007	China	West Lhasa Terrane	Tibetan Plateau	LMP	CHZ-5	Miocene		19	54.37	1.51	13.7	2.89	3.67	6.36	-	5.74	7.62	1.67	0.94	0.61	99.08	20.1	164	329	27	202	781	739	32.9	884	57.9	2346	133	310	-	215	40.6	5.91	-	2.17	-	-	-	-	2.4	-	24.2	3.37	105
Gao et al. 2007	China	West Lhasa Terrane	Tibetan Plateau	LMP	CHZ-6	Miocene		19	55.66	1.52	13.71	3.11	3.02	5.78	-	4.95	8.2	1.81	0.9	0.43	99.09	17.4	134	269	21.7	151	785	688	32.7	917	70.7	2151	143	329	-	221	40.4	5.8	-	2.17	-	-	-	-	2.33	-	25.8	3.62	158
Gao et al. 2007	China	West Lhasa Terrane	Tibetan Plateau	LMP	CHZ-7	Miocene		19	54	1.59	12.79	3.3	2.93	6.64	-	6.05	8.04	1.51	1.26	0.73	98.84	19.3	151	326	25	179	871	844	35.5	983	65.8	3167	140	347	-	236	45	6.73	-	2.38	-	-	-	-	2.34	-	26.6	3.59	150
Gao et al. 2007	China	West Lhasa Terrane	Tibetan Plateau	LMP	CHZ-8	Miocene		19	54.15	1.6	12.76	3.25	2.82	6.67	-	5.84	8.27	1.46	1.2	0.84	98.86	18.2	137	316	23.6	174	564	1072	35.4	1000	73.8	3819	141	344	-	234	43.7	6.68	-	2.31	-	-	-	-	2.3	-	27.2	3.72	166
Gao et al. 2007	China	West Lhasa Terrane	Tibetan Plateau	LMP	CHZ-9	Miocene		19	54.07	1.62	12.64	3.43	2.68	6.79	-	5.9	8.36	1.37	1.38	0.78	99.02	19.5	135	324	25.3	188	538	911	35.6	935	70.9	3336	135	361	-	247	47.5	7.06	-	2.47	-	-	-	-	2.36	-	26.2	3.88	110
Gao et al. 2007	China	West Lhasa Terrane	Tibetan Plateau	LMP	CHZ-10	Miocene		19	53.9	1.63	12.73	3.51	2.68	6.59	-	6.03	8.61	1.34	1.26	0.73	99.01	19.1	145	322	25.7	188	529	861	35.5	965	75	3263	139	354	-	243	45.7	6.86	-	2.45	-	-	-	-	2.31	-	26.5	4.17	144
Gao et al. 2007	China	West Lhasa Terrane	Tibetan Plateau	LMP	CHZ-11	Miocene		19	53.5	1.6	12.57	3.28	2.92	7.12	-	6.32	7.7	1.61	1.32	0.91	98.85	19.5	142	357	25.8	194	811	855	34.5	749	50.4	3287	138	336	-	237	45.1	6.75	-	2.37	-	-	-	-	2.15	-	20.6	2.7	125
Gao et al. 2007	China	West Lhasa Terrane	Tibetan Plateau	LMP	CHZ-12	Miocene		19	54.58	1.61	12.78	3.31	2.95	6.37	-	5.88	8.32	1.61	1.16	0.51	99.08	20.1	152	351	25.7	193	795	790	37.4	853	80.6	2968	140	361	-	254	48	6.9	-	2.52	-	-	-	-	2.5	-	24.4	4.54	147
Miller et al. 1999	China	West Lhasa Terrane	Tibetan Plateau	LMP	TE008/93	Miocene		19	60.62	0.86	12.88	5.51	-	3.93	-	5.06	6.23	2.62	0.6	1.37	99.68	16	107	314	20	144	528	849	25	446	28	2351	112	275	-	157	28	4.5	-	1.7	-	-	-	-	1.6	-	12.2	1.8	118
Miller et al. 1999	China	West Lhasa Terrane	Tibetan Plateau	LMP	TE011/93	Miocene		19	56.96	1.01	13.87	5.73	-	3.99	-	5.06	6.86	2.17	0.61	2.77	99.03	15	111	332	20	145	574	772	25	418	38	2715	115	251	-	158	28	2.8	-	1.7	-	-	-	-	1.4	-	13	1.8	128
Miller et al. 1999	China	West Lhasa Terrane	Tibetan Plateau	LMP	TE117/93	Miocene		19	57.98	1.01	12.14	5.87	-	4.64	-	6.83	6.48	2.51	1.02	0.64	99.12	12	120	377	21	193	753	842	27	461	29	2160	81	197	-	145	31	4.8	-	1.6	-	-	-	-	1.7	-	12.5	1.6	52
Miller et al. 1999	China	West Lhasa Terrane	Tibetan Plateau	LMP	TE118/93	Miocene		19	57.41	1.03	12.35	6.21	-	4.62	-	6.72	6.29	2.47	0.97	0.72	98.79	14	128	419	25	169	712	802	28	454	26	2292	85	203	-	135	30	4.9	-	1.5	-	-	-	-	1.6	-	13	1.6	53
Miller et al. 1999	China	West Lhasa Terrane	Tibetan Plateau	LMP	TE125/93	Miocene		19	56.45	1.32	12.99	6.55	-	4.12	-	4.75	7.54	1.15	0.7	3.67	99.24	18	133	295	21	87	632	621	27	511	38	1863	72	185	-	109	25	4	-	1.5	-	-	-	-	2	-	15.6	2.8	47
Miller et al. 1999	China	West Lhasa Terrane	Tibetan Plateau	LMP	TE126/93	Miocene		19	53.48	1.34	13.91	7.47	-	4.65	-	6.87	6.34	2.17	0.83	1.84	98.9	17	128	496	25	203	465	792	24	635	37	2718	119	284	-	200	31	4.4	-	1.5	-	-	-	-	1.3	-	17.7	2.5	93
Miller et al. 1999	China	West Lhasa Terrane	Tibetan Plateau	LMP	TE127/93	Miocene		19	55.13	1.37	13.18	7.25	-	4.6	-	6.68	6.6	2.14	0.78	2.27	100	18	130	494	26	212	437	787	24	609	38	2715	118	290	-	171	32	4.6	-	1.7	-	-	-	-	1.4	-	18.2	2.7	88
Miller et al. 1999	China	West Lhasa Terrane	Tibetan Plateau	LMP	TE131/93	Miocene		19	53.76	1.29	14.32	6.7	-	5.53	-	6.82	5.98	2.52	0.83	1.13	98.88	18	109	384	30	202	466	802	26	589	40	2397	112	269	-	155	29	4.3	-	1.5	-	-	-	-	1.3	-	19.1	2.8	88
Miller et al. 1999	China	West Lhasa Terrane	Tibetan Plateau	LMP	TE137/93	Miocene		19	53.64	0.91	12.05	6.65	-	4.65	-	10.16	6.71	1.62	1.1	0.86	98.35	13	115	528	28	358	702	990	30	392	23	3488	84	207	-	144	30	5.3	-	1.8	-	-	-	-	2.1	-	11.2	1.3	79
Miller et al. 1999	China	West Lhasa Terrane	Tibetan Plateau	LMP	TE138/93	Miocene		19	57.73	0.87	12.18	6.31	-	4.27	-	7.14	6.19	2.11	0.91	1.08	98.79	12	109	368	24	230	523	1042	28	387	24	3416	89	206	-	145	29	4.7	-	1.7	-	-	-	-	1.9	-	10	1.3	87
Ref	Nation	General location	Sepecific location	Series	Sample	Age	Age Ma	Symbol	SiO2	TiO2	Al2O3	Fe2O3	FeO	CaO	MnO	MgO	K2O	Na2O	P2O5	LOI	Sum	Sc	V	Cr	Co	Ni	Rb	Sr	Y	Zr	Nb	Ba	La	Ce	Pr	Nd	Sm	Eu	Gd	Tb	Dy	Ho	Er	Tm	Yb	Lu	Hf	Ta	Pb
					name			key
	ANOROGENIC
Fraser et al. 1985	Australia	West Australian Craton		LMP	PK1	Miocene		20	-	-	-	-	-	-	-	-	7.42933	-	-	-	7.42933	19.2	-	-	69.3	-	614	1346	-	-	-		290	601	-	191	22.1	4.55	-	1.24	-	-	-	-	1.66	-	24	15.9	47.7
Fraser et al. 1985	Australia	West Australian Craton		LMP	PK3/3	Miocene		20	-	-	-	-	-	-	-	-	4.59472	-	-	-	4.59472	18.4	-	-	38.6	-	460	2004	-	-	-	14100	425	825	-	276	29.3	7	-	1.91	-	-	-	-	1.78	0.2	44.2	13.3	39.7
Fraser et al. 1985	Australia	West Australian Craton		LMP	PK7	Miocene		20	-	-	-	-	-	-	-	-	9.00835	-	-	-	9.00835	14.2	-	-	29.9	-	260	1058	-	-	-	9200	213	340	-	121	14.6	3.46	-	0.91	-	-	-	-	1.14	0.15	31.1	5.54	-
Fraser et al. 1985	Australia	West Australian Craton		LMP	PK11	Miocene		20	-	-	-	-	-	-	-	-	12.0018	-	-	-	12.0018	14.3	-	-	31.2	-	551	1479	-	-	-	8000	323	602	-	209	24.7	5.7	-	1.58	-	-	-	-	1.31	-	35.1	7.92	-
Fraser et al. 1985	Australia	West Australian Craton		LMP	PK12	Miocene		20	-	-	-	-	-	-	-	-	11.7752	-	-	-	11.7752	14.9	-	-	35.7	-	362	1837	-	-	-	4600	402	727	-	243	29.1	6.96	-	1.78	-	-	-	-	1.66	0.25	37.7	10.4	-
Fraser et al. 1985	Australia	West Australian Craton		LMP	PK13	Miocene		20	-	-	-	-	-	-	-	-	13.3261	-	-	-	13.3261	14	-	-	39.5	-	272	983	-	-	-	7900	182	338	-	118	13.8	3.27	-	0.84	-	-	-	-	1.07	-	35.8	6.67	-
Fraser et al. 1985	Australia	West Australian Craton		LMP	PK3/8	Miocene		20	-	-	-	-	-	-	-	-	1.9676	-	-	-	1.9676	17.6	-	-	33.7	-	439	1590	-	-	-	9200	160	239	-	73.5	10.6	2.91	-	0.95	-	-	-	-	1.33	-	64.2	6.24	-
Fraser et al. 1985	Australia	West Australian Craton		LMP	PK3/9	Miocene		20	-	-	-	-	-	-	-	-	7.62087	-	-	-	7.62087	17.7	-	-	26.2	-	396	2349	-	-	-	18100	110	171	-	53.3	7.61	2.1	-	0.7	-	-	-	-	1.32	-	44.4	5	-
Fraser et al. 1985	Australia	West Australian Craton		LMP	PK5	Miocene		20	-	-	-	-	-	-	-	-	11.4756	-	-	-	11.4756	12.7	-	-	28.5	-	300	840	-	-	-	6010	322	526	-	192	23	5.64	-	1.64	-	-	-	-	1.6	0.19	29.1	6.41	48
Fraser et al. 1985	Australia	West Australian Craton		LMP	PK8	Miocene		20	-	-	-	-	-	-	-	-	5.14857	-	-	-	5.14857	15.9	-	-	33.2	-	195	1011	-	-	-	6910	254	376	-	133	16.5	4.02	-	1.3	-	-	-	-	1.89	0.21	33	9	48.4
Fraser et al. 1985	Australia	West Australian Craton		LMP	PK9/3	Miocene		20	-	-	-	-	-	-	-	-	6.29841	-	-	-	6.29841	15.1	-	-	27.2	-	243	1377	-	-	-	8500	319	495	-	180	21.2	5.23	-	1.55	-	-	-	-	2.06	0.24	32	6.72	59.5
Fraser et al. 1985	Australia	West Australian Craton		LMP	PK9/4	Miocene		20	-	-	-	-	-	-	-	-	3.39775	-	-	-	3.39775	13.5	-	-	33.5	-	190	1152	-	-	-	4400	206	351	-	112	13.2	3.28	-	1.01	-	-	-	-	1.48	0.17	35	7.44	-
Fraser et al. 1985	Australia	West Australian Craton		LMP	PK19	Miocene		20	-	-	-	-	-	-	-	-	2.94396	-	-	-	2.94396	16.5	-	-	40.4	-	359	549	-	-	-	11900	252	457	-	163	20.3	4.98	-	1.43	-	-	-	-	1.59	0.19	40.9	8.95	-
Fraser et al. 1985	Australia	West Australian Craton		LMP	PK20/1	Miocene		20	-	-	-	-	-	-	-	-	5.46487	-	-	-	5.46487	15.3	-	-	43.9	-	220	1249	-	-	-	7100	234	403	-	129	15.2	3.71	-	0.97	-	-	-	-	1.42	0.2	28.8	7.08	47.08
Fraser et al. 1985	Australia	West Australian Craton		LMP	PK20/2	Miocene		20	-	-	-	-	-	-	-	-	6.05683	-	-	-	6.05683	14.6	-	-	24.8	-	280	1427	-	-	-	14000	273	458	-	153	19.5	4.67	-	1.36	-	-	-	-	1.8	0.27	23.5	4.68	-
Jaques and Foley 2018	Australia	Kimberley Craton	West Kimberley region	LMP	78210847	Miocene		20	49.34	4.42	9.49	3.73	2.8	4.31	0.08	9.14	7.9	0.28	0.95	-	92.44	-	154	560	37	331	567	989	4	1054	93	7117	211	438	-	145	-	-	-	-	-	-	-	-	-	-	-	-	36
Jaques and Foley 2018	Australia	Kimberley Craton	West Kimberley region	LMP	80210125	Miocene		20	51.67	4.17	8.92	2.88	3.19	3.73	0.08	9.09	8.4	0.27	0.93	-	93.33	-	153	220	-	337	512	1038	7	927	81	7158	172	266	-	-	-	-	-	-	-	-	-	-	-	-	-	-	33
Jaques and Foley 2018	Australia	Kimberley Craton	West Kimberley region	LMP	71453M	Miocene		20	41.9	2.72	3.7	3.7	4.82	4.91	0.13	25	4.02	0.45	1.22	-	92.57	18	79	1398	80	1040	569	1078	18	667	225	4192	302	435	-	-	-	-	-	-	-	-	-	-	-	-	-	-	40
Jaques and Foley 2018	Australia	Kimberley Craton	West Kimberley region	LMP	83210296	Miocene		20	41.42	2.62	3.37	4.79	3.68	4.71	0.13	25.87	1.62	0.37	1.4	-	89.98	13	59	1432	-	1134	603	1102	23	780	244	21726	256	441	-	202	-	-	-	-	-	-	-	-	-	-	-	-	42
Jaques and Foley 2018	Australia	Kimberley Craton	West Kimberley region	LMP	89210442	Miocene		20	42.11	3.55	3.32	4.15	3.62	5.19	0.12	23.09	5.5	0.54	1.7	4.09	96.98	24	24	1367	-	1132	463	1618	22	1438	243	10419	366	635	-	220	-	-	-	-	-	-	-	-	-	-	-	-	60
Jaques and Foley 2018	Australia	Kimberley Craton	West Kimberley region	LMP	80210126	Miocene		20	40.83	2.56	3.28	4.55	3.88	4.21	0.13	28.24	3.53	0.35	0.55	-	92.11	15	49	1651	-	1157	388	1057	8	620	120	6531	146	260	-	85	-	-	-	-	-	-	-	-	-	-	-	-	19
Jaques and Foley 2018	Australia	Kimberley Craton	West Kimberley region	LMP	71448F	Miocene		20	41.52	2.68	3.54	4.57	3.9	4.38	0.13	26.9	4.1	0.36	0.62	-	92.7	18	46	1250	81	1380	386	959	16	564	118	10093	185	261	-	-	-	-	-	-	-	-	-	-	-	-	-	-	20
Jaques and Foley 2018	Australia	Kimberley Craton	West Kimberley region	LMP	71456D / GSWA 71465D	Miocene		20	40.09	3.54	4.62	4.61	4.38	5.75	0.15	22.5	4.58	0.6	1.02	-	91.84	22	52	944	74	1100	764	1344	25	832	245	17435	419	771	-	-	-	-	-	-	-	-	-	-	-	-	-	-	20
Jaques and Foley 2018	Australia	Kimberley Craton	West Kimberley region	LMP	71475B	Miocene		20	40.71	3.31	4.51	4.58	4.28	5.37	0.14	22.2	4.51	0.37	1.48	-	91.46	21	32	947	73	1100	486	1172	20	796	233	18281	412	673	-	-	-	-	-	-	-	-	-	-	-	-	-	-	50
Jaques and Foley 2018	Australia	Kimberley Craton	West Kimberley region	LMP	83210276	Miocene		20	48.74	4.46	6.59	4.24	2.18	4.14	0.09	13.67	6.65	0.9	0.69	-	92.35	11	148	718	-	538	204	1213	20	938	124	13769	193	354	-	164	-	-	-	-	-	-	-	-	-	-	-	-	26
Jaques and Foley 2018	Australia	Kimberley Craton	West Kimberley region	LMP	71160408	Miocene		20	50.37	4.95	8.84	5.29	1.54	3.01	0.07	7.38	7.9	0.18	1.11	-	90.64	-	213	552	40	336	3694	902	2	1115	104	16409	289	554	-	184	-	-	-	-	-	-	-	-	-	-	-	-	46
Jaques et al. 1986	Australia	Kimberley Craton	Argyle diamond pipe	LMP	BMR 83211049	Proterozoic		20	41.73	2.8	4.08	2.85	4.9	5.22	0.18	21.75	4.85	0.19	0.94	-	89.49	12	114	1316	-	969	288	1041	20	590	194	1579	123	249	-	82	-	-	-	-	-	-	-	-	-	-	-	-	19
Jaques et al. 1986	Australia	Kimberley Craton	Argyle diamond pipe	LMP	BMR 83211018	Proterozoic		20	49.86	3.04	6.96	1.77	5.6	3.99	0.08	15.39	5.86	0.12	1.02	-	93.69	13	114	1097	-	517	208	755	23	888	217	2368	104	239	-	83	-	-	-	-	-	-	-	-	-	-	-	-	27
Jaques et al. 1986	Australia	Kimberley Craton	Argyle diamond pipe	LMP	BMR 83211037	Proterozoic		20	40.85	3.7	4.55	2.29	6.93	7.54	0.1	18.98	2.18	0.09	1.2	-	88.41	15	143	1682	-	952	230	1220	22	762	273	1011	150	305	-	89	-	-	-	-	-	-	-	-	-	-	-	-	233
Jaques et al. 1986	Australia	Kimberley Craton	Fitzroy	LMP	BMR 83210290	Miocene		20	50.56	6.44	7.89	5.22	1.8	3.83	0.08	8.42	10.08	0.95	0.37	-	95.64	14	200	422	-	372	330	1382	24	1264	140	13245	277	501	-	245	-	-	-	-	-	-	-	-	-	-	-	-	55
Jaques et al. 1986	Australia	Kimberley Craton	Fitzroy	LMP	BMR 83210291	Miocene		20	53.06	6.28	8.41	4.89	1.38	3.38	0.08	6.44	9.86	0.8		-	94.58	12	182	389	-	348	318	1379	28	1268	127	10271	290	525	-	241	-	-	-	-	-	-	-	-	-	-	-	-	57
Jaques et al. 1986	Australia	Kimberley Craton	Fitzroy	LMP	BMR 8120230A	Miocene		20	48.17	6.04	7.83	5.88	1.34	3.79	0.11	8.53	8.38	0.49	0.37	-	90.93	10	206	385	-	359	393	2111	20	1218	107	12179	301	566	-	186	-	-	-	-	-	-	-	-	-	-	-	-	49
Jaques et al. 1986	Australia	Kimberley Craton	Fitzroy	LMP	BMR 83210288	Miocene		20	52.23	5.76	8.64	5.17	0.98	3.55	0.08	6.28	10.72	0.61	1	-	95.02	13	161	392	-	340	372	1235	20	1297	118	10346	241	445	-	210	-	-	-	-	-	-	-	-	-	-	-	-	50
Jaques et al. 1986	Australia	Kimberley Craton	Fitzroy	LMP	GSWA 71894	Miocene		20	56.3	6.89	8.7	5.4	0.97	0.91	0.04	4.96	10	0.16	0.89	-	95.22	22	201	266	-	240	297	702	20	1123	91	8777	265	348	-	-	-	-	-	-	-	-	-	-	-	-	-	-	49
Jaques et al. 1986	Australia	Kimberley Craton	Fitzroy	LMP	GSWA 71893B	Miocene		20	51.6	4.9	8.1	5.1	1.51	3.09	0.07	7.07	7.8	0.32	1.13	-	90.69	19	170	365	-	304	1123	960	-	946	90	12933	258	274	-	-	-	-	-	-	-	-	-	-	-	-	-	-	48
Jaques et al. 1986	Australia	Kimberley Craton	West Kimberley region	LMP	BMR 81210145	Miocene		20	53.47	6.43	8.27	5.52	1.56	2.95	0.09	5.38	10.36	0.68	0.66	-	95.37	11	165	317	-	179	236	1166	17	1107	100	9509	235	332	-	174	-	-	-	-	-	-	-	-	-	-	-	-	38
Jaques et al. 1986	Australia	Kimberley Craton	West Kimberley region	LMP	BMR 81210147	Miocene		20	52.13	5.6	8.13	5.11	1.66	3.5	0.1	7	9.79	1.07	0.39	-	94.48	12	154	265	-	380	192	1119	16	1007	95	8758	197	291	-	146	-	-	-	-	-	-	-	-	-	-	-	-	32
Jaques et al. 1986	Australia	Kimberley Craton	West Kimberley region	LMP	BMR 83210259	Miocene		20	52.42	6.36	8.04	5.43	1.46	3.48	0.09	6.63	10.29	0.73	0.55	-	95.48	15	213	396	-	342	248	1191	22	1300	132	9622	241	446	-	210	-	-	-	-	-	-	-	-	-	-	-	-	44
Jaques et al. 1986	Australia	Kimberley Craton	West Kimberley region	LMP	GSWA 71828	Miocene		20	53.2	5.87	7.1	5.1	0.61	2.36	0.06	7.11	9.74	0.1	1.83	-	93.08	18	236	199	24	325	404	1625	34	1939	138	8002	488	767	-	-	-	-	-	-	-	-	-	-	-	-	-	-	85
Jaques et al. 1986	Australia	Kimberley Craton	West Kimberley region	LMP	BMR 83210305	Miocene		20	49.62	5.86	6.83	4.76	0.49	2.7	0.03	7.85	6.03	1.01	1.34	-	86.52	11	205	357	-	272	7470	2560	-	1653	194	9568	419	851	-	332	-	-	-	-	-	-	-	-	-	-	-	-	101
Jaques et al. 1986	Australia	Kimberley Craton	West Kimberley region	LMP	GSWA 71818	Miocene		20	53.5	5.72	7	4.2	1.27	2.61	0.07	7.39	10	0.7	1.37	-	93.83	17	160	234	32	249	315	1930	19	1865	135	12059	441	789	-	-	-	-	-	-	-	-	-	-	-	-	-	-	68
Jaques et al. 1986	Australia	Kimberley Craton	West Kimberley region	LMP	GSWA 30493	Proterozoic		20	49.5	7.36	5.7	6.1	1.29	2.68	0.13	11	8.48	0.28	1.44	-	93.96	25	520	300	50	380	550	1600	40	1800	300	7970	600	950	-	-	-	-	-	-	-	-	-	-	-	-	-	-	100
Jaques et al. 1986	Australia	Kimberley Craton	West Kimberley region	LMP	GSWA 71388	Miocene		20	40.4	4.12	6	8	0.9	6.31	0.11	15.2	3.99	0.82	0.67	-	86.52	23	59	622	-	540	507	1334	20	938	203	27968	392	417	-	-	-	-	-	-	-	-	-	-	-	-	-	-	40
Jaques et al. 1986	Australia	Kimberley Craton	West Kimberley region	LMP	GSWA 71386	Miocene		20	30.2	3.79	4.1	6.9	0.26	15.7	0.14	9.45	2.68	0.21	0.39	-	73.82	18	40	389	-	410	409	967	26	849	152	29504	356	340	-	-	-	-	-	-	-	-	-	-	-	-	-	-	40
Jaques et al. 1986	Australia	Kimberley Craton	West Kimberley region	LMP	GSWA 71382	Miocene		20	49	3.7	7.41	6.41	0.87	4.33	0.06	9.03	6.6	0.55	1.52	-	89.48	21	170	523	-	500	192	1601	28	1079	167	11523	552	783	-	-	-	-	-	-	-	-	-	-	-	-	-	-	90
Jaques et al. 1986	Australia	Kimberley Craton	West Kimberley region	LMP	BMR 83210340	Miocene		20	51.47	7.73	7.92	5.7	0.81	0.06	0.06	6.07	10.41	0.29	0.58	-	91.1	14	162	367	-	304	374	1369	21	1591	148	11233	250	459	-	239	-	-	-	-	-	-	-	-	-	-	-	-	51
Jaques et al. 1986	Australia	Kimberley Craton	West Kimberley region	LMP	BMR 83210341	Miocene		20	51.01	7.71	8.11	5.55	0.9	2.95	0.06	5.81	10.85	0.25	0.57	-	93.77	13	163	366	-	316	351	1238	20	1595	146	14678	266	489	-	283	-	-	-	-	-	-	-	-	-	-	-	-	49
Jaques et al. 1986	Australia	Kimberley Craton	West Kimberley region	LMP	BMR 83210342	Miocene		20	53.96	5.67	8.3	5.42	1.06	1.94	0.06	6.24	11.42	0.43	1.18	-	95.68	13	296	475	-	339	308	1712	31	1354	177	8678	436	764	-	268	-	-	-	-	-	-	-	-	-	-	-	-	95
Jaques et al. 1986	Australia	Kimberley Craton	West Kimberley region	LMP	BMR 67160338	Miocene		20	50.47	5.67	7.38	5.72	1.62	4.15	0.09	9.12	8.8	0.44	0.75	-	94.21	-	204	490	33	235	341	777	15	1225	166	11253	245	355	-	-	-	-	-	-	-	-	-	-	-	-	-	-	37
Jaques et al. 1986	Australia	Kimberley Craton	West Kimberley region	LMP	BMR69161334	Miocene		20	55.06	5.78	6.9	6.12	1.32	3.33	0.08	6.85	8.37	0.47	0.96	-	95.24	-	240	408	32	181	328	835	16	1233	181	9660	212	325	-	-	-	-	-	-	-	-	-	-	-	-	-	-	31
Jaques et al. 1986	Australia	Kimberley Craton	West Kimberley region	LMP	BMR80210069	Miocene		20	52.11	5.9	8.96	5.11	1.17	1.98	0.05	5.78	11.67	0.08	1.51	-	94.32	-	614	266	-	241	245	1416	19	1147	117	8565	317	450	-	-	-	-	-	-	-	-	-	-	-	-	-	-	57
Jaques et al. 1986	Australia	Kimberley Craton	West Kimberley region	LMP	GSWA 71371	Miocene		20	52.6	6.14	7.6	5.7	1.47	3.88	0.09	6.95	9.36	1	0.91	-	95.7	21	148	255	30	143	338	1196	18	1250	122	16710	295	303	-	-	-	-	-	-	-	-	-	-	-	-	-	-	40
Jaques et al. 1986	Australia	Kimberley Craton	West Kimberley region	LMP	GSWA 71887A	Miocene		20	51.7	5.42	7.9	4.7	2.37	3.3	0.08	8.82	8.78	0.88	0.69	-	94.64	20	160	445	38	749	219	924	13	989	108	10089	269	290	-	-	-	-	-	-	-	-	-	-	-	-	-	-	26
Jaques et al. 1986	Australia	Kimberley Craton	West Kimberley region	LMP	GSWA 71890A	Miocene		20	49.1	6.82	8.6	6.9	1.23	3.13	0.1	5.9	8.92	0.19	1.38	-	92.27	27	315	449	47	318	287	1040	19	1192	150	16411	351	400	-	-	-	-	-	-	-	-	-	-	-	-	-	-	52
Jaques et al. 1986	Australia	Kimberley Craton	West Kimberley region	LMP	BMR 80210125	Miocene		20	51.67	4.17	8.92	2.88	3.19	3.73	0.08	9.09	8.4	0.27	0.93	-	93.33	-	153	220	-	337	512	1038	7	927	81	7158	172	266	-	-	-	-	-	-	-	-	-	-	-	-	-		33
Jaques et al. 1986	Australia	Kimberley Craton	West Kimberley region	LMP	BMR 80210083	Miocene		20	47.72	6.67	8.81	8.25	0.32	2	0.06	5.53	9.66	0.06	1.49	-	90.57	-	303	635	-	475	446	1120	36	1618	227	7222	637	1028	-	420	-	-	-	-	-	-	-	-	-	-	-	-	78
Jaques et al. 1986	Australia	Kimberley Craton	West Kimberley region	LMP	GSWA 714551	Miocene		20	41.45	2.71	3.37	4.27	4.32	4.79	0.13	28	2.24	0.34	1.33	-	92.95	21	93	1182	89	1200	483	1538	12	700	206	9080	303	574	-	-	-	-	-	-	-	-	-	-	-	-	-	-	20
Jaques et al. 1986	Australia	Kimberley Craton	West Kimberley region	LMP	GSWA 71450A	Miocene		20	42.5	2.39	3.5	4.7	3.54	4.77	0.12	25.7	2.21	0.53	1.35	-	91.31	20	81	1089	85	1110	454	933	11	645	173	12200	312	521	-	-	-	-	-	-	-	-	-	-	-	-	-	-	37
Jaques et al. 1986	Australia	Kimberley Craton	West Kimberley region	LMP	BMR 83210316	Miocene		20	42.22	4.92	5.61	7.61	1.35	5.54	0.1	13.49	4.37	0.62	1.67	-	87.5	17	158	830	-	606	527	1833	37	1525	309	24572	419	760	-	-	-	-	-	-	-	-	-	-	-	-	-	-	84
Jaques et al. 1986	Australia	Kimberley Craton	West Kimberley region	LMP	GSWA 71857	Miocene		20	44.6	5.94	7.2	10.6	0.77	3.41	0.09	6.28	6.55	0.21	2.47	-	88.12	45	321	799	37	578	373	1296	29	1914	283	9954	648	1173	-	-	-	-	-	-	-	-	-	-	-	-	-	-	63
Jaques et al. 1986	Australia	Kimberley Craton	West Kimberley region	LMP	GSWA 71859	Miocene		20	46.3	5.23	6.5	7.8	0.27	4.25	0.07	9.69	5.86	0.29	1.57	-	87.83	25	503	540	23	540	261	1140	17	1129	180	9048	335	600	-	-	-	-	-	-	-	-	-	-	-	-	-	-	38
Jaques et al. 1986	Australia	Kimberley Craton	West Kimberley region	LMP	GSWA 76015A	Miocene		20	40.8	4.36	4.8	7.8	1	4.94	0.09	15.6	2.62	0.4	1.45	-	83.86	26	87	796	56	737	570	1350	15	1344	208	3551	470	830	-	-	-	-	-	-	-	-	-	-	-	-	-	-	54
Jaques et al. 1986	Australia	Kimberley Craton	West Kimberley region	LMP	GSWA 71860C	Miocene		20	17.3	1.99	2.5	4.8	0.22	17.3	0.2	19	1.18	0.21	0.63	-	65.33	12	33	277	35	360	208	1342	12	486	94	8688	266	379	-	-	-	-	-	-	-	-	-	-	-	-	-	-	60
Jaques et al. 1986	Australia	Kimberley Craton	West Kimberley region	LMP	GSWA 71440	Miocene		20	42.5	4.63	4.3	5.5	2.79	4.6	0.13	17.7	4.34	0.88	1.44	-	88.81	27	56	952	58	600	538	1613	29	1371	259	4906	511	669	-	-	-	-	-	-	-	-	-	-	-	-	-	-	80
Jaques et al. 1986	Australia	Kimberley Craton	West Kimberley region	LMP	GSWA 71436	Miocene		20	37.1	4.6	4.4	6.4	2.94	7.25	0.14	15.8	3.35	0.63	2.1	-	84.71	29	50	695	51	627	362	1975	26	1648	207	5306	623	1186	-	-	-	-	-	-	-	-	-	-	-	-	-	-	75
Jaques et al. 1986	Australia	Kimberley Craton	West Kimberley region	LMP	GSWA 71437B	Miocene		20	37.4	4.79	4.7	6.5	2.79	6.21	0.14	16.3	3.47	0.86	1.87	-	85.03	32	56	633	51	632	358	1874	24	1618	211	6239	616	1137	-	-	-	-	-	-	-	-	-	-	-	-	-	-	77
Jaques et al. 1986	Australia	Kimberley Craton	West Kimberley region	LMP	GSWA 71442	Miocene		20	39.6	4.59	4.2	5.6	2.69	5.65	0.16	17.7	4.11	0.96	1.21	-	86.47	25	30	698	61	706	471	1659	21	1550	229	7676	618	1131	-	-	-	-	-	-	-	-	-	-	-	-	-	-	80
Jaques et al. 1986	Australia	Kimberley Craton	West Kimberley region	LMP	GSWA 65912	Miocene		20	49.84	5.62	7.76	5.55	2.36	4.74	0.08	7.84	8.67	0.79	0.89	-	94.14	20	179	302	45	240	331	1398	21	1287	154	18069	285	491	-	-	-	-	-	-	-	-	-	-	-	-	-	-	40
Jaques et al. 1986	Australia	Kimberley Craton	West Kimberley region	LMP	GSWA 71847	Miocene		20	55	5.67	7.3	4.8	0.7	2.51	0.03	6.04	8.53	0.35	1.24	-	92.17	14	176	173	35	258	1060	1538	14	1371	94	11485	304	463	-	-	-	-	-	-	-	-	-	-	-	-	-	-	67
Jaques et al. 1986	Australia	Kimberley Craton	West Kimberley region	LMP	GSWA 71849	Miocene		20	52	5.38	7.6	5	1.26	2.52	0.05	7.89	9.28	0.58	1.02	-	92.58	17	221	341	46	609	238	1084	16	1280	93	8325	323	463	-	-	-	-	-	-	-	-	-	-	-	-	-	-	56
Jaques et al. 1986	Australia	Kimberley Craton	West Kimberley region	LMP	GSWA 71417	Miocene		20	51.6	6.86	6.8	5.6	1.4	2.93	0.07	9.37	9.15	0.35	0.7	-	94.83	18	143	663	40	228	398	1078	21	1491	136	11968	324	386	-	-	-	-	-	-	-	-	-	-	-	-	-	-	40
Jaques et al. 1986	Australia	Kimberley Craton	West Kimberley region	LMP	1	Miocene		20	39.1	2.31	2.3	4.9	2.16	2.46	0.12	27.8	2.1	0.05	1.56	-	84.86	20	32	800	85	1500	300	850	18	800	150	6000	300	480	-	-	-	-	-	-	-	-	-	-	-	-	-	-	40
Jaques et al. 1986	Australia	Kimberley Craton	West Kimberley region	LMP	2	Miocene		20	45	3.2	4	4.4	2.44	4.91	0.14	16	6.56	0.3	2.71	-	89.66	20	287	450	60	640	400	1700	27	1200	150	17020	450	700	-	-	-	-	-	-	-	-	-	-	-	-	-	-	80
Jaques et al. 1986	Australia	Kimberley Craton	West Kimberley region	LMP	GSWA 71498	Miocene		20	38.8	2.22	2	5.1	1.92	2.71	0.1	27.8	2.17	0.08	1.7	-	84.6	17	77	833	70	1257	291	987	11	926	110	6853	293	493	-	-	-	-	-	-	-	-	-	-	-	-	-	-	35
Jaques et al. 1986	Australia	Kimberley Craton	West Kimberley region	LMP	GSWA 71467B	Miocene		20	37.7	3.81	3.2	6.1	2.16	3.84	0.12	24.6	5.69	0.43	1.66	-	89.31	26	122	1214	75	1068	554	1491	17	1470	181	8071	512	926	-	-	-	-	-	-	-	-	-	-	-	-	-	-	58
Jaques et al. 1986	Australia	Kimberley Craton	West Kimberley region	LMP	GSWA 714681	Miocene		20	42.2	3.41	3.6	4.1	3.62	4.55	0.12	23	4.89	0.47	1.64	-	91.6	22	205	1076	73	967	383	1455	16	1244	166	11986	449	783	-	-	-	-	-	-	-	-	-	-	-	-	-	-	53
Jaques et al. 1986	Australia	Kimberley Craton	West Kimberley region	LMP	GSWA 71479G	Miocene		20	38.6	2.25	2.2	5.3	2.17	2.6	0.11	27.7	3.2	0.09	1.34	-	85.56	16	39	795	83	1396	333	1093	11	845	104	6446	359	609	-	-	-	-	-	-	-	-	-	-	-	-	-	-	44
Jaques et al. 1986	Australia	Kimberley Craton	West Kimberley region	LMP	GSWA 71466B	Miocene		20	38	3.54	2.9	5.7	2.45	3.9	0.13	25	5.26	0.49	1.81	-	89.18	25	47	1149	74	1117	607	1430	14	1378	175	7317	471	888	-	-	-	-	-	-	-	-	-	-	-	-	-	-	59
Jaques et al. 1986	Australia	Kimberley Craton	West Kimberley region	LMP	GSWA 71478N	Miocene		20	38.7	3.89	3.7	5.4	2.81	4.16	0.12	22	3.63	1.05	1.49	-	86.95	21	83	859	71	931	392	1271	13	1163	159	16187	393	622	-	-	-	-	-	-	-	-	-	-	-	-	-	-	42
Jaques et al. 1986	Australia	Kimberley Craton	West Kimberley region	LMP	GSWA 71491F	Miocene		20	35.2	2.49	2	5.4	1.59	6.9	0.08	23.6	1.37	0.12	2.93	-	81.68	18	43	804	65	925	187	1083	16	1269	137	6576	409	740	-	-	-	-	-	-	-	-	-	-	-	-	-	-	56
Jaques et al. 1986	Australia	Kimberley Craton	West Kimberley region	LMP	GSWA 71492A	Miocene		20	37.4	3.72	3.4	6.1	1.98	4.92	0.12	23	2.41	0.35	1.34	-	84.74	24	60	1121	68	954	378	1530	21	1430	189	5354	425	821	-	-	-	-	-	-	-	-	-	-	-	-	-	-	58
Jaques et al. 1986	Australia	Kimberley Craton	West Kimberley region	LMP	GSWA 71448F	Miocene		20	41.52	2.68	3.54	4.57	3.9	4.38	0.13	26.9	4.1	0.36	0.62	-	92.7	18	46	1250	81	1500	386	959	16	564	118	10093	185	261	-	-	-	-	-	-	-	-	-	-	-	-	-	-	20
Jaques et al. 1986	Australia	Kimberley Craton	West Kimberley region	LMP	GSWA 71449A	Miocene		20	49.26	5.41	7.27	5.47	1.02	2.56	0.1	8.29	7.74	0.45	0.64	-	88.21	18	139	316	42	390	1459	1075	19	1238	123	31447	308	368	-	-	-	-	-	-	-	-	-	-	-	-	-	-	50
Jaques et al. 1986	Australia	Kimberley Craton	West Kimberley region	LMP	GSWA 71456A	Miocene		20	36.81	3.33	4.01	5.38	4	5.8	0.14	23.4	4.74	0.47	2.85	-	90.93	23	40	1084	83	1200	751	1341	19	723	224	13465	372	742	-	-	-	-	-	-	-	-	-	-	-	-	-	-	20
Jaques et al. 1986	Australia	Kimberley Craton	West Kimberley region	LMP	GSWA 71474B	Miocene		20	40.43	3.31	4.48	4.22	4.42	5.67	0.14	21.6	4.95	0.6	1.6	-	91.42	22	49	888	77	930	500	1284	19	807	232	27674	366	591	-	-	-	-	-	-	-	-	-	-	-	-	-	-	50
Jaques et al. 1986	Australia	Kimberley Craton	West Kimberley region	LMP	GSWA 71458	Miocene		20	40.6	3.06	4.5	4.4	4.08	5.31	0.14	22.6	3.7	0.74	1.41	-	90.54	17	84	874	66	899	500	1075	14	777	197	23990	396	556	-	-	-	-	-	-	-	-	-	-	-	-	-	-	42
Jaques et al. 1986	Australia	Kimberley Craton	West Kimberley region	LMP	GSWA 71460	Miocene		20	40	3.19	4.2	4.7	3.82	5.16	0.14	22.7	3.16	0.31	1.62	-	89	22	97	916	66	909	447	1124	16	843	199	12825	400	680	-	-	-	-	-	-	-	-	-	-	-	-	-	-	48
Jaques et al. 1986	Australia	Kimberley Craton	West Kimberley region	LMP	GSWA 71464C	Miocene		20	44.1	3.2	3.5	4.5	3.09	3.74	0.12	21.3	6.51	0.93	1.13	-	92.12	20	195	816	64	888	494	943	19	902	169	9416	427	767	-	-	-	-	-	-	-	-	-	-	-	-	-	-	51
Jaques et al. 1986	Australia	Kimberley Craton	West Kimberley region	LMP	BMR 8120152	Miocene		20	49.95	6.45	7.12	4.66	1.54	3.24	0.09	9.27	9	0.68	0.72	-	92.72	8	245	400	-	349	268	1420	15	1214	110	14027	286	560	-	175	-	-	-	-	-	-	-	-	-	-	-	-	43
Jaques et al. 1986	Australia	Kimberley Craton	West Kimberley region	LMP	BMR 83210280	Miocene		20	50.8	6.65	7.4	4.83	1.43	3.35	0.08	8.48	9.26	0.88	0.62	-	93.78	12	232	433	-	453	275	1420	21	1399	147	12763	296	539	-	258	-	-	-	-	-	-	-	-	-	-	-	-	55
Jaques et al. 1986	Australia	Kimberley Craton	West Kimberley region	LMP	GSWA 71877	Miocene		20	51.1	5.89	8.6	4.8	1.71	2.56	0.08	7.77	10.7	0.64	0.62	-	94.47	17	159	231	31	318	284	1393	18	1030	114	11723	351	459	-	-	-	-	-	-	-	-	-	-	-	-	-	-	71
Jaques et al. 1986	Australia	Kimberley Craton	West Kimberley region	LMP	BMR 83210284	Miocene		20	53.9	6.23	7.9	5.9	0.71	1.81	0.07	5.54	10.47	0.38	1.41	-	94.32	15	234	347	-	275	380	1530	27	1493	177	8530	411	778	-	284	-	-	-	-	-	-	-	-	-	-	-	-	90
Jaques et al. 1986	Australia	Kimberley Craton	West Kimberley region	LMP	GSWA 71880	Miocene		20	50.1	7.02	8.9	6.6	0.71	1.88	0.06	6.62	11.45	0.22	1.45	-	95.01	23	180	220	29	300	381	1337	27	1217	139	6351	419	585	-	-	-	-	-	-	-	-	-	-	-	-	-	-	73
Jaques et al. 1986	Australia	Kimberley Craton	West Kimberley region	LMP	GSWA 71325	Miocene		20	51.9	5.16	9.4	5.7	1.23	2.96	0.07	5.86	10.5	0.2	1.99	-	94.97	16	203	267	35	320	277	1229	23	1108	112	7265	418	548	-	-	-	-	-	-	-	-	-	-	-	-	-	-	90
Jaques et al. 1986	Australia	Kimberley Craton	West Kimberley region	LMP	GSWA 71326	Miocene		20	52.2	5.92	8.4	5.9	1.26	2.67	0.07	6.63	9.7	0.36	0.97	-	94.08	17	186	246	30	540	305	1086	16	1103	98	11666	337	403	-	-	-	-	-	-	-	-	-	-	-	-	-	-	60
Jaques et al. 1986	Australia	Kimberley Craton	West Kimberley region	LMP	GSWA 71327	Miocene		20	51.7	6.11	8.8	5.8	1.84	3.32	0.09	5.92	9.27	0.74	0.79	-	94.38	19	169	226	35	370	313	-	20	1129	94	12363	317	394	-	-	-	-	-	-	-	-	-	-	-	-	-	-	60
Jaques et al. 1986	Australia	Kimberley Craton	West Kimberley region	LMP	GSWA 71885	Miocene		20	52.3	5.14	8.9	4.9	2	1.88	0.05	7.21	8.87	0.22	1.07	-	92.54	19	191	292	20	700	224	1269	19	1030	103	10193	381	420	-	-	-	-	-	-	-	-	-	-	-	-	-	-	70
Jaques et al. 1986	Australia	Kimberley Craton	West Kimberley region	LMP	GSWA 71882A	Miocene		20	51.5	6.53	7.9	5.2	1.63	3.57	0.08	7.28	9.42	0.65	0.85	-	94.61	16	164	255	32	280	237	1190	16	1029	91	9832	298	308	-	-	-	-	-	-	-	-	-	-	-	-	-	-	42
Jaques et al. 1986	Australia	Kimberley Craton	West Kimberley region	LMP	BMR 67165018	Miocene		20	48.4	5.14	8.03	6.37	0.85	6.99	0.07	8.65	7.78	0.36	1.15	-	93.79	-	109	291	-	158	316	1139	20	1167	148	11516	201	261	-	-	-	-	-	-	-	-	-	-	-	-	-	-	40
Jaques et al. 1986	Australia	Kimberley Craton	West Kimberley region	LMP	BMR 81210157	Miocene		20	52.91	4.94	7.66	5.7	1.17	6.37	0.1	7.14	8.21	0.61	1.2	-	96.01	12	125	258	-	160	293	1130	19	1026	130	5245	174	225	-	107	-	-	-	-	-	-	-	-	-	-	-	-	35
Jaques et al. 1986	Australia	Kimberley Craton	West Kimberley region	LMP	BMR 81210155	Miocene		20	46.85	6.81	9.3	8.42	1.25	2.6	0.1	4.8	10.58	0.25	1.6	-	92.56	18	255	375	-	121	271	914	30	1301	167	14445	311	410	-	223	-	-	-	-	-	-	-	-	-	-	-	-	45
Jaques et al. 1986	Australia	Kimberley Craton	West Kimberley region	LMP	BMR 81210156	Miocene		20	51.45	5.43	6.98	5.17	1.56	4.38	0.1	9.19	9.36	0.47	0.61	-	94.7	10	198	440	-	512	182	1104	18	1102	102	6084	229	461	-	141	-	-	-	-	-	-	-	-	-	-	-	-	34
Jaques et al. 1986	Australia	Kimberley Craton	West Kimberley region	LMP	BMR 83210270	Miocene		20	49	5.25	6.76	5.24	1.2	4	0.06	10.07	7.33	0.27	1.01	-	90.19	11	163	436	-	496	135	1084	21	1240	134	7542	218	390	-	159	-	-	-	-	-	-	-	-	-	-	-	-	44
Jaques et al. 1986	Australia	Kimberley Craton	West Kimberley region	LMP	BMR 79211048	Miocene		20	53.61	5.66	9.85	5.66	1.22	2.13	0.11	4.99	11.22	0.67	0.72	-	95.84	-	282	296	30	263	322	1033	18	1215	129	10105	409	552	-	-	-	-	-	-	-	-	-	-	-	-	-	-	71
Jaques et al. 1986	Australia	Kimberley Craton	West Kimberley region	LMP	GSWA 71310	Miocene		20	53.9	5.26	9.6	5.9	1.48	2.34	0.08	4.79	10.3	0.61	0.81	-	95.07	17	185	267	35	450	252	1085	17	1014	106	6652	342	479	-	-	-	-	-	-	-	-	-	-	-	-	-	-	80
Jaques et al. 1986	Australia	Kimberley Craton	West Kimberley region	LMP	GSWA 71868A	Miocene		20	50.3	6.63	8	5.7	1.58	2.88	0.12	7.74	10.25	0.52	1.01	-	94.73	20	186	366	36	381	228	1111	23	1270	131	4461	371	469	-	-	-	-	-	-	-	-	-	-	-	-	-	-	60
Jaques et al. 1986	Australia	Kimberley Craton	West Kimberley region	LMP	BMR 83210275	Miocene		20	48.68	4.64	6.44	3.85	2.02	3.28	0.1	16.19	7.26	0.74	0.48	-	93.68	10	143	677	-	528	143	954	17	1042	107	6148	197	357	-	137	-	-	-	-	-	-	-	-	-	-	-	-	39
Jaques et al. 1986	Australia	Kimberley Craton	West Kimberley region	LMP	BMR 83210277	Miocene		20	49.44	5.73	7.05	5.02	1.26	3.4	0.07	9.97	8.66	0.71	0.56	-	91.87	11	171	468	-	417	177	1174	19	1263	141	14094	246	449	-	221	-	-	-	-	-	-	-	-	-	-	-	-	51
Jaques et al. 1986	Australia	Kimberley Craton	West Kimberley region	LMP	GSWA 71870D	Miocene		20	50.2	6.86	8.1	6.1	0.86	2.32	0.05	7.29	10.68	0.13	1.19	-	93.78	23	231	360	38	628	267	1285	15	1199	119	5534	331	430	-	-	-	-	-	-	-	-	-	-	-	-	-	-	58
Jaques et al. 1986	Australia	Kimberley Craton	West Kimberley region	LMP	GSWA 71874B	Miocene		20	50.3	6.71	8.9	7.1	0.76	1.83	0.08	6.18	11.61	0.12	1.49	-	95.08	23	375	224	33	277	262	1099	22	1167	124	5871	348	507	-	-	-	-	-	-	-	-	-	-	-	-	-	-	73
Jaques et al. 1986	Australia	Kimberley Craton	West Kimberley region	LMP	GSWA 71875C	Miocene		20	50	7.16	9.5	6.8	0.75	2.51	0.05	5.24	10.82	0.06	1.93	-	94.82	22	282	276	23	190	273	731	34	1206	136	7699	434	528	-	-	-	-	-	-	-	-	-	-	-	-	-	-	83
Jaques et al. 1986	Australia	Kimberley Craton	West Kimberley region	LMP	BMR 81210154	Miocene		20	49.14	5.35	7.51	6.4	1.02	6.26	0.1	7.78	8.51	0.5	1.17	-	93.74	11	214	280	-	246	525	1192	17	1066	134	9401	214	291	-	157	-	-	-	-	-	-	-	-	-	-	-	-	35
Jaques et al. 1986	Australia	Kimberley Craton	West Kimberley region	LMP	BMR 81210169	Miocene		20	42.43	5.77	4.44	4.94	2.37	4.06	0.11	19.04	5.11	0.63	0.8	-	89.7	9	140	1033	-	673	300	1150	12	1215	130	4009	161	293	-	97	-	-	-	-	-	-	-	-	-	-	-	-	22
Jaques et al. 1986	Australia	Kimberley Craton	West Kimberley region	LMP	BMR 80210093	Miocene		20	51.69	4.27	8.31	5.09	2.03	3.77	0.08	6.04	10.79	0.7	2.2	-	94.97	-	248	194	-	223	286	2692	26	885	92	12147	256	372	-	-	-	-	-	-	-	-	-	-	-	-	-	-	53
Jaques et al. 1986	Australia	Kimberley Craton	West Kimberley region	LMP	BMR 81210170C	Miocene		20	50.47	4.85	7.11	4.18	2.45	2.43	0.09	10.47	8.98	0.68	0.84	-	92.55	11	186	275	-	265	236	1374	25	1092	114	4020	279	422	-	172	-	-	-	-	-	-	-	-	-	-	-	-	50
Jaques et al. 1986	Australia	Kimberley Craton	West Kimberley region	LMP	BMR 83210321	Miocene		20	44.68	6.84	5.78	5.43	1.56	4.05	0.08	11.5	6.53	0.72	1.37	-	88.54	12	178	521	-	443	666	1897	33	2102	254	22076	336	719	-	377	-	-	-	-	-	-	-	-	-	-	-	-	77
Jaques et al. 1986	Australia	Kimberley Craton	West Kimberley region	LMP	BMR 83210320	Miocene		20	48.17	6.42	8.22	5.6	0.92	2.75	0.04	7.8	11.23	0.18	2.37	-	93.7	15	158	630	-	538	711	1999	37	2340	244	4124	489	967	-	326	-	-	-	-	-	-	-	-	-	-	-	-	95
Jaques et al. 1986	Australia	Kimberley Craton	West Kimberley region	LMP	BMR 83210326	Miocene		20	42.84	7.53	5.45	6.34	1.44	3.98	0.09	11.24	7.37	0.46	2.02	-	88.76	16	225	546	-	280	653	1996	38	2472	299	17084	486	1045	-	471	-	-	-	-	-	-	-	-	-	-	-	-	93
Jaques et al. 1986	Australia	Kimberley Craton	West Kimberley region	LMP	BMR 83210323	Miocene		20	44.59	8.13	6.17	6.35	1.87	4.15	0.1	10.36	8.91	0.64	1.98	-	93.25	18	242	665	-	356	694	1722	38	2611	308	11273	716	1734	-	695	-	-	-	-	-	-	-	-	-	-	-	-	101
Jaques et al. 1986	Australia	Kimberley Craton	West Kimberley region	LMP	GSWA 71803	Miocene		20	49	5.85	6.2	4.6	1.89	3.47	0.07	11.2	7.73	0.83	1.74	-	92.58	21	162	406	35	857	342	1640	15	1926	151	7149	385	718	-	-	-	-	-	-	-	-	-	-	-	-	-	-	48
Jaques et al. 1986	Australia	Kimberley Craton	West Kimberley region	LMP	GSWA 71403	Miocene		20	45.6	6.65	6.6	7.4	0.77	3.87	0.11	10.3	9.83	0.38	2.07	-	93.58	23	124	419	44	156	649	1875	29	1831	276	21947	520	610	-	-	-	-	-	-	-	-	-	-	-	-	-	-	80
Jaques et al. 1986	Australia	Kimberley Craton	West Kimberley region	LMP	GSWA 71399	Miocene		20	51.2	5.31	8.2	5.3	1.13	2.99	0.08	6	9.95	0.69	1.71	-	92.56	18	178	320	34	342	259	996	19	1467	116	15461	386	570	-	-	-	-	-	-	-	-	-	-	-	-	-	-	58
Jaques et al. 1986	Australia	Kimberley Craton	West Kimberley region	LMP	GSWA 71838	Miocene		20	52.4	5.54	8.5	5.1	1.04	2.32	0.05	6.69	10.8	0.43	1.41	-	94.28	17	278	283	37	522	318	1254	18	1633	129	5716	435	749	-	-	-	-	-	-	-	-	-	-	-	-	-	-	75
Jaques et al. 1986	Australia	Kimberley Craton	West Kimberley region	LMP	BMR 83210265	Miocene		20	50.75	5.68	7.59	4.82	1.34	3.7	0.07	9.18	8.69	0.92	0.53	-	93.27	12	178	461	-	354	243	1254	19	1235	118	8167	228	419	-	182	-	-	-	-	-	-	-	-	-	-	-	-	39
Jaques et al. 1986	Australia	Kimberley Craton	West Kimberley region	LMP	BMR 83210266	Miocene		20	50.6	6.18	7.95	5.73	1.23	4	0.07	7.09	9.67	0.61	0.65	-	93.78	14	188	506	-	443	203	1190	21	1311	134	11190	242	437	-	218	-	-	-	-	-	-	-	-	-	-	-	-	44
Jaques et al. 1986	Australia	Kimberley Craton	West Kimberley region	LMP	BMR 83210336	Miocene		20	48.18	5.27	6.65	6.11	0.86	3.12	0.07	11.65	7.45	0.43	1.04	-	90.83	11	167	772	-	519	252	1398	25	1234	164	9001	233	365	-	176	-	-	-	-	-	-	-	-	-	-	-	-	56
Jaques et al. 1986	Australia	Kimberley Craton	West Kimberley region	LMP	BMR 83210345	Miocene		20	50.24	6.13	8.36	5.17	1.04	3.67	0.07	7.47	9.96	0.8	0.96	-	93.87	14	229	308	-	267	296	1466	21	1346	168	15896	259	479	-	267	-	-	-	-	-	-	-	-	-	-	-	-	50
Jaques et al. 1986	Australia	Kimberley Craton	West Kimberley region	LMP	BMR 81210195	Miocene		20	36.11	5.27	4.72	5.94	0.51	15.73	0.08	7.64	7.4	0.32	1.18	-	84.9	17	39	34	-	66	447	1839	10	2462	96	12767	79	123	-	36	-	-	-	-	-	-	-	-	-	-	-	-	10
Jaques et al. 1986	Australia	Kimberley Craton	West Kimberley region	LMP	BMR 81210201	Miocene		20	44.89	4	6.13	6.17	0.57	3.64	0.1	13.88	5.79	0.44	0.27	-	85.88	8	116	836	-	439	543	812	7	1057	105	32132	441	649	-	231	-	-	-	-	-	-	-	-	-	-	-	-	9
Jaques et al. 1986	Australia	Kimberley Craton	West Kimberley region	LMP	BMR 84210349	Miocene		20	44.31	4.36	5.13	5.26	1.81	2.23	0.1	19.9	3.72	0.36	0.11	-	87.29	10	96	851	-	819	417	867	20	1167	153	5390	138	250	-	116	-	-	-	-	-	-	-	-	-	-	-	-	28
Jaques et al. 1986	Australia	Kimberley Craton	West Kimberley region	LMP	BMR 81210203	Miocene		20	40.23	4.15	5.74	6.63	1.1	3.89	0.11	17.29	7.78	0.38	2.44	-	89.74	14	103	-	-	518	582	1223	9	1598	107	15312	148	177	-	123	-	-	-	-	-	-	-	-	-	-	-	-	25
Jaques et al. 1986	Australia	Kimberley Craton	West Kimberley region	LMP	GSWA 71301	Miocene		20	33.4	9.14	3.8	7.1	0.68	13.3	0.06	6.98	6.44	0.37	1.79	-	83.06	21	65	7	-	100	324	1743	8	676	87	18176	79	-	-	-	-	-	-	-	-	-	-	-	-	-	-	-	30
Jaques et al. 1986	Australia	Kimberley Craton	West Kimberley region	LMP	GSWA 71302	Miocene		20	48.5	5.24	6.1	6.1	1.76	5.52	0.11	9.77	8.28	0.98	1.03	-	93.39	24	50	213	-	290	395	1600	19	1928	135	19754	283	277	-	-	-	-	-	-	-	-	-	-	-	-	-	-	50
Jaques et al. 1986	Australia	Kimberley Craton	West Kimberley region	LMP	BMR 81210196	Miocene		20	59.55	11.97	0.41	9.41	1.51	2.45	0.14	4.45	4.28	0.42	0.53	-	95.12	43	262	67	-	50	470	1080	31	6011	294	7304	120	194	-	68	-	-	-	-	-	-	-	-	-	-	-	-	110
Jaques et al. 1986	Australia	Kimberley Craton	West Kimberley region	LMP	BMR 81210197A	Miocene		20	47.32	5.49	5.54	6.98	1.52	5.78	0.13	11.08	8.73	0.73	1.25	-	94.55	15	124	413	-	281	452	1614	18	2320	143	19640	154	259	-	82	-	-	-	-	-	-	-	-	-	-	-	-	39
Jaques et al. 1986	Australia	Kimberley Craton	West Kimberley region	LMP	BMR 80210097	Miocene		20	52.17	4.75	8.64	3.84	1.9	2.92	0.09	7.73	10.73	0.52	1.31	-	94.6	-	164	198	-	289	272	1501	18	932	99	11419	219	298	-	-	-	-	-	-	-	-	-	-	-	-	-	-	52
Jaques et al. 1986	Australia	Kimberley Craton	West Kimberley region	LMP	GSWA 71361	Miocene		20	51.3	5.05	8	5.9	0.66	2.97	0.07	6.65	8.73	0.6	0.65	-	90.58	17	188	253	30	490	168	1417	18	969	104	22102	421	417	-	-	-	-	-	-	-	-	-	-	-	-	-	-	60
Jaques et al. 1986	Australia	Kimberley Craton	West Kimberley region	LMP	BMR 83210246	Miocene		20	51	6.09	8.54	5.6	1.05	2.24	0.08	5.74	11.76	0.5	1.27	-	93.87	14	288	345	-	116	293	1734	31	1446	181	16244	450	801	-	344	-	-	-	-	-	-	-	-	-	-	-	-	94
Jaques et al. 1986	Australia	Kimberley Craton	West Kimberley region	LMP	BMR 83210249	Miocene		20	50.53	6.35	8.91	6.52	0.64	1.62	0.09	5.14	12.05	0.32	1.03	-	93.2	15	271	340	-	233	278	811	32	1427	194	18290	496	856	-	363	-	-	-	-	-	-	-	-	-	-	-	-	101
McCulloch et al. 1983	Australia	Kimberley Craton	Fitzroy	LMP	WAK-6-L	Miocene		20	-	-	-	-	-	-	-	-	-	-	-	-	-	-	-	-	-	-	3400	997	-	-	-	-	-	-	-	131.8	15.9	-	-	-	-	-	-	-	-	-	-	-	46
McCulloch et al. 1983	Australia	Kimberley Craton	Fitzroy	LMP	WAK-2-L	Miocene		20	-	-	-	-	-	-	-	-	-	-	-	-	-	-	-	-	-	-	350	1481	-	-	-	-	-	-	-	213.1	25.3	-	-	-	-	-	-	-	-	-	-	-	64.6
McCulloch et al. 1983	Australia	Kimberley Craton	Fitzroy	LMP	WAK-10-L	Miocene		20	-	-	-	-	-	-	-	-	-	-	-	-	-	-	-	-	-	-	668	1845	-	-	-	-	-	-	-	336.5	37.4	-	-	-	-	-	-	-	-	-	-	-	104
McCulloch et al. 1983	Australia	Kimberley Craton	Fitzroy	LMP	WAK-14-L	Miocene		20	-	-	-	-	-	-	-	-	-	-	-	-	-	-	-	-	-	-	258	1546	-	-	-	-	-	-	-	129.4	15.2	-	-	-	-	-	-	-	-	-	-	-	51
McCulloch et al. 1983	Australia	Kimberley Craton	Fitzroy	LMP	WAK-25-L	Miocene		20	-	-	-	-	-	-	-	-	-	-	-	-	-	-	-	-	-	-	477	1904	-	-	-	-	-	-	-	97	13.1	-	-	-	-	-	-	-	-	-	-	-	46
McCulloch et al. 1983	Australia	Kimberley Craton	Fitzroy	LMP	WAK-30-L	Miocene		20	-	-	-	-	-	-	-	-	-	-	-	-	-	-	-	-	-	-	490	1323	-	-	-	-	-	-	-	88.5	11.1	-	-	-	-	-	-	-	-	-	-	-	23
Nelson et al. 1986	Australia	West Australian Craton		LMP	WAK-11L	Miocene		20	-	-	-	-	-	-	-	-	-	-	-	-	-	-	-	-	-	-	-	-	-	-	-	-	-	-	-	-	-	-	-	-	-	-	-	-	-	-	-	-	37
Nelson et al. 1986	Australia	West Australian Craton		LMP	WAK-13L	Miocene		20	-	-	-	-	-	-	-	-	-	-	-	-	-	-	-	-	-	-	-	-	-	-	-	-	-	-	-	-	-	-	-	-	-	-	-	-	-	-	-	-	-
Nelson et al. 1986	Australia	West Australian Craton		LMP	WAK-15K	Miocene		20	-	-	-	-	-	-	-	-	-	-	-	-	-	-	-	-	-	-	-	-	-	-	-	-	-	-	-	-	-	-	-	-	-	-	-	-	-	-	-	-	32
Nelson et al. 1986	Australia	West Australian Craton		LMP	WAK-16K	Miocene		20	-	-	-	-	-	-	-	-	-	-	-	-	-	-	-	-	-	-	-	-	-	-	-	-	-	-	-	-	-	-	-	-	-	-	-	-	-	-	-	-	22
Nelson et al. 1986	Australia	West Australian Craton		LMP	WAK-17L	Miocene		20	-	-	-	-	-	-	-	-	-	-	-	-	-	-	-	-	-	-	-	-	-	-	-	-	-	-	-	-	-	-	-	-	-	-	-	-	-	-	-	-	50
Nelson et al. 1986	Australia	West Australian Craton		LMP	WAK-20K	Miocene		20	-	-	-	-	-	-	-	-	-	-	-	-	-	-	-	-	-	-	-	-	-	-	-	-	-	-	-	-	-	-	-	-	-	-	-	-	-	-	-	-	47
Nelson et al. 1986	Australia	West Australian Craton		LMP	WAK-21K	Miocene		20	-	-	-	-	-	-	-	-	-	-	-	-	-	-	-	-	-	-	-	-	-	-	-	-	-	-	-	-	-	-	-	-	-	-	-	-	-	-	-	-	53
Nelson et al. 1986	Australia	West Australian Craton		LMP	WAK-27L	Miocene		20	-	-	-	-	-	-	-	-	-	-	-	-	-	-	-	-	-	-	-	-	-	-	-	-	-	-	-	-	-	-	-	-	-	-	-	-	-	-	-	-	41.3
Murphy et al. 2002	Antarctica	Gaussberg		LMP	KC97-1/1	Pleistocene		20	50.8	3.3	10.3	6.5	-	4.4	0.1	7.8	11.6	1.8	1.5	-	98.1	8.8	94.1	365	32	264	183	1816	20.74	1018	107.3	5431	163	316	34.7	116.3	15.23	3.79	9.53	1.172	5.34	0.898	2.047	0.256	1.456	0.204	25	5.42	38.8
Murphy et al. 2002	Antarctica	Gaussberg		LMP	KC97-1/2	Pleistocene		20	49.1	3.4	9.6	6.7	-	4.3	0.1	8.1	11.7	1.9	1.6	-	96.5	12.7	61.8	218	19	154	257	1355	17.29	715	80.2	4697	153.7	272	28.3	93.5	11.85	2.93	7.28	0.859	3.87	0.661	1.523	0.185	1.106	0.153	17.5	4.66	29.6
Murphy et al. 2002	Antarctica	Gaussberg		LMP	KC97-11	Pleistocene		20	50.8	3.4	10	6.5	-	4.2	0.1	7.5	12.5	1.9	1.5	-	98.4	13.9	86.5	288	27	221	283	1603	20.94	962	97.1	5216	187.2	339	35.5	118.1	14.98	3.74	9.19	1.085	4.98	0.844	1.934	0.237	1.407	0.196	23.5	5.03	37.5
Murphy et al. 2002	Antarctica	Gaussberg		LMP	KC97-12A	Pleistocene		20	50.4	3.5	9.9	6.7	-	4.3	0.1	8	12.2	2	1.6	-	98.7	14.9	94.8	287	30	244	319	1754	22.86	1040	105.7	5686	204.1	369	39	128.6	16.37	4.09	10.09	1.179	5.46	0.922	2.092	0.256	1.537	0.211	25.2	5.4	42.7
Murphy et al. 2002	Antarctica	Gaussberg		LMP	KC97-12B	Pleistocene		20	50.4	3.5	9.8	6.6	-	4.3	0.1	7.5	12	2	1.6	-	97.8	12.4	85.6	257	25	186	264	1593	20.68	993	97.9	5007	171.1	320	33.9	112.9	14.41	3.5	8.94	1.085	4.98	0.837	1.919	0.246	1.389	0.193	24.6	5.08	36
Murphy et al. 2002	Antarctica	Gaussberg		LMP	KC97-13A	Pleistocene		20	51	3.4	10.1	6.6	-	4.3	0.1	7.6	11.6	2.3	1.5	-	98.5	14.3	90.9	325	31	268	310	1723	21.45	932	99.2	5205	187.8	342	36.2	119.4	15.32	3.85	9.48	1.109	5.15	0.86	1.974	0.235	1.441	0.2	22.5	5.07	35.5
Murphy et al. 2002	Antarctica	Gaussberg		LMP	KC97-14	Pleistocene		20	51.6	3.2	9.5	6.6	-	4.2	0.1	7.4	11.7	2	1.5	-	97.8	13.8	69	249	23	185	286	1371	22.82	1106	88.7	4609	173.7	316	33.5	111	14.32	3.5	8.98	1.083	5.12	0.883	2.148	0.265	1.611	0.225	27.4	4.41	36.3
Murphy et al. 2002	Antarctica	Gaussberg		LMP	KC97-16F	Pleistocene		20	52.4	3.2	10.3	6.7	-	4.7	0.1	8.8	12.1	1.7	1.5	-	101.5	14.4	86.1	360	30	280	307	1698	20.48	897	96.6	5011	181.8	332	35.2	116.8	14.91	3.8	9.14	1.063	4.92	0.805	1.898	0.223	1.338	0.183	21.7	4.9	34.8
Murphy et al. 2002	Antarctica	Gaussberg		LMP	KC97-17A	Pleistocene		20	50.2	3	10.4	6.2	-	4.5	0.1	8.4	11.3	1.2	1.4	-	96.7	14.6	86.9	319	28	225	313	1738	20.48	887	95.9	5119	184.7	336	35.6	118.5	15.07	3.83	9.25	1.077	4.96	0.814	1.891	0.223	1.324	0.184	21.6	4.89	34.7
Murphy et al. 2002	Antarctica	Gaussberg		LMP	KC97-17B	Pleistocene		20	50.5	3.1	10.3	6.4	-	4.7	0.1	8.2	12	1.5	1.5	-	98.3	14.6	85.8	316	29	243	305	1721	21.02	899	96.8	5023	187.9	344	36.4	121.4	15.44	3.94	9.48	1.107	5.05	0.834	1.928	0.224	1.367	0.191	22	4.98	35.6
Murphy et al. 2002	Antarctica	Gaussberg		LMP	KC97-19A	Pleistocene		20	48.7	3.3	9.4	6.9	-	4.4	0.1	8.7	11	0.7	1.6	-	94.8	14.8	109	313	30	268	285	1722	20.54	938	98.9	5581	186.7	337	35.8	118.1	15.16	3.79	9.26	1.093	5	0.823	1.869	0.226	1.343	0.185	22.9	5.07	36.1
Murphy et al. 2002	Antarctica	Gaussberg		LMP	K-97-19B	Pleistocene		20	49.2	3.2	9.6	6.6	-	4.4	0.1	8.2	11.2	1.2	1.5	-	95.2	14.2	78.7	327	29	266	310	1566	20.2	861	90.5	4790	177.6	323	34.2	113.6	14.65	3.67	8.99	1.058	4.85	0.814	1.879	0.223	1.342	0.189	21.1	4.63	33.3
Murphy et al. 2002	Antarctica	Gaussberg		LMP	KC97-19C	Pleistocene		20	48.9	3.3	9.4	6.6	-	4.6	0.1	7.8	11.3	1.5	1.5	-	95	14.5	91.2	304	29	247	310	1700	21.76	954	99.9	5234	190.4	344	36.3	120	15.31	3.87	9.6	1.12	5.24	0.869	2.005	0.24	1.501	0.202	23.1	5.11	36.5
Murphy et al. 2002	Antarctica	Gaussberg		LMP	KC97-20A	Pleistocene		20	51.3	3.3	9.8	6.6	-	4.7	0.1	8.3	11.4	1.3	1.6	-	98.4	13.7	84.9	270	28	230	302	1599	20.82	902	91.7	5022	178.4	324	34.2	113.7	14.54	3.63	9.13	1.072	4.96	0.839	1.921	0.229	1.405	0.193	22	4.79	34.9
Murphy et al. 2002	Antarctica	Gaussberg		LMP	KC97-20H	Pleistocene		20	49.2	3.1	9.8	6.3	-	4.1	0.1	8.3	11.1	1.1	1.4	-	94.5	14	86.3	274	27	206	304	1631	20.96	954	96.8	5217	185	335	35.2	117.2	14.92	3.79	9.29	1.093	5.05	0.837	1.952	0.235	1.414	0.197	23.2	4.99	36.6
Murphy et al. 2002	Antarctica	Gaussberg		LMP	KC97-23F	Pleistocene		20	49.6	3.2	9.9	6.6	-	4.7	0.1	8.4	11.5	1.3	1.5	-	96.8	14.8	88.4	343	29	231	310	1737	21.61	911	98.1	5108	188.3	343	36.3	120.9	15.45	3.95	9.6	1.129	5.11	0.864	1.99	0.234	1.424	0.198	22	4.99	35.4
Murphy et al. 2002	Antarctica	Gaussberg		LMP	KC97-27	Pleistocene		20	50.3	3.4	9.9	6.6	-	4.5	0.1	7.5	12.2	1.8	1.5	-	97.8	14	88.3	327	28	339	298	1651	20.9	950	98.4	5316	185.5	337	35.3	116.8	14.82	3.74	9.17	1.079	4.96	0.834	1.941	0.229	1.392	0.195	23	5.06	36.3
Murphy et al. 2002	Antarctica	Gaussberg		LMP	KC97-28A	Pleistocene		20	50.3	3.2	10.4	6.3	-	4.2	0.1	7.1	12.2	1.8	1.4	-	97	14.5	82.3	289	26	212	303	1487	20.08	867	89	4800	174.3	314	33	109.6	13.85	3.47	8.55	1.017	4.7	0.795	1.875	0.229	1.352	0.188	21.1	4.64	33
Murphy et al. 2002	Antarctica	Gaussberg		LMP	KC97-28B	Pleistocene		20	51.6	3.3	10	6.6	-	4.3	0.1	8	12.2	1.9	1.5	-	99.5	13.6	85.7	265	27	219	299	1642	21.01	922	94.3	5090	183.1	331	34.8	115.2	14.69	3.68	9.04	1.074	4.99	0.826	1.937	0.235	1.423	0.2	22.5	4.8	35.5
Murphy et al. 2002	Antarctica	Gaussberg		LMP	KC97-4A	Pleistocene		20	52.2	3.6	9.8	7	-	4.4	0.1	8.1	11.8	0.8	1.5	-	99.3	16.3	76.1	337	29	246	306	1430	22.73	1420	111	5085	187.6	346	36.4	121.5	15.53	3.93	9.76	1.164	5.44	0.922	2.099	0.263	1.57	0.216	35.3	5.33	39.9
Murphy et al. 2002	Antarctica	Gaussberg		LMP	KC97-4B	Pleistocene		20	51.1	3.4	9.6	6.8	-	4.4	0.1	7.7	11.5	0.8	1.5	-	96.9	16.4	78.2	348	30	258	305	1505	23.1	1423	111	5092	195.2	360	37.8	125.6	15.94	3.96	9.9	1.183	5.46	0.926	2.156	0.261	1.602	0.223	35.4	5.4	40.1
Murphy et al. 2002	Antarctica	Gaussberg		LMP	KC97-4C	Pleistocene		20	51.4	3.4	9.5	6.7	-	4.3	0.1	7.8	11	1	1.4	-	96.6	9.3	68.1	335	30	274	160	1465	19.46	1335	102.2	4302	154	300	32.7	110	14.17	3.38	8.81	1.074	4.95	0.845	1.953	0.252	1.439	0.196	34.3	5.06	50.5
Murphy et al. 2002	Antarctica	Gaussberg		LMP	KC97-4D	Pleistocene		20	50.9	3.3	9.6	6.9	-	4.3	0.1	8.5	11.7	0.9	1.6	-	97.8	15.6	74	347	29	252	323	1539	20.74	1314	103.8	5049	182.8	333	35.1	116.2	14.53	3.66	8.96	1.065	4.93	0.832	1.94	0.239	1.432	0.197	32.5	4.99	39.2
Murphy et al. 2002	Antarctica	Gaussberg		LMP	KC97-5C	Pleistocene		20	51.5	3.5	10	6.7	-	4.3	0.1	7.9	12.3	2	1.6	-	99.9	14.1	85.4	295	27	230	297	1601	21.92	955	96.8	5192	187.2	339	35.7	118.3	15.12	3.77	9.36	1.111	5.08	0.866	2.022	0.245	1.465	0.206	23.2	5	35.9
Mirnejad and Bell 2006	Wyoming, USA	Leucite Hills		LMP	110 BGT	Plio-Pleistocene		20	43.2	2.29	7.85	5.94	-	11.1	0.1	10.5	6.85	1.23	2.92	5.42	97.4	-	129	469	25	142	166	6223	23	234	109	8171	397	735	81.5	292	33	7	20.6	1.6	5.4	0.7	1.4	0.1	0.57	-	4.6	5.4	42
Mirnejad and Bell 2006	Wyoming, USA	Leucite Hills		LMP	112 BGT	Plio-Pleistocene		20	41.9	2.19	7.72	5.58	-	12.3	0.1	10	4.74	1.06	3.01	9.05	97.65	-	65	489	24	148	226	5323	22	140	98	10300	402	754	83.3	300	33.8	7	21.5	1.6	5.1	0.7	1.4	0.1	0.49	-	2.4	5.3	31
Mirnejad and Bell 2006	Wyoming, USA	Leucite Hills		LMP	113BGT	Plio-Pleistocene		20	-	-	-	-	-	-	-	-	-	-	-	-	0	-	-	-	-	-	-	-	-	-	-	-	-	-	-	-	-	-	-	-	-	-	-	-	-	-	-	-	-
Mirnejad and Bell 2006	Wyoming, USA	Leucite Hills		LMP	114 BGT	Plio-Pleistocene		20	42	2.16	8.01	5.76	-	10.8	0.11	10	6.2	1.7	2.84	6.8	96.38	-	116	471	27	109	215	5745	20	634	127	12500	370	739	81.4	286	34.6	7.1	13.4	1.3	5.1	0.6	0.7	0.1	0.43	0.09	19	4.78	43
Mirnejad and Bell 2006	Wyoming, USA	Leucite Hills		LMP	116 BGT	Plio-Pleistocene		20	43.9	2.24	8.36	5.69	-	10	0.09	9.3	8.14	0.9	2.99	5.86	97.47	-	114	471	27	128	268	5250	20	788	127	9920	395	778	85.6	299	35.6	7.6	13.9	1.3	5.5	0.7	0.8	0.1	0.46	0.1	22	4.45	52
Mirnejad and Bell 2006	Wyoming, USA	Leucite Hills		LMP	133 PLB	Plio-Pleistocene		20	42.2	2.28	7.46	6.38	-	12.4	0.13	12	5.39	0.55	1.63	6.51	96.93	-	31	546	29	120	177	7233	22	705	139	11020	338	685	77.4	276	35.7	7.7	15.9	1.5	5.8	0.7	0.9	0.1	0.52	0.09	10	6.23	53
Mirnejad and Bell 2006	Wyoming, USA	Leucite Hills		LMP	135 PLB	Plio-Pleistocene		20	41.4	2.23	7.42	6.24	-	12.7	0.12	12.2	5.13	0.48	1.87	6.43	96.22	-	21	560	30	121	166	6628	22	793	136	11690	321	653	73.5	265	33.9	7.3	14.1	1.4	5.5	0.7	0.8	0.1	0.46	0.1	8.8	5.51	43
Mirnejad and Bell 2006	Wyoming, USA	Leucite Hills		LMP	136 PLB	Plio-Pleistocene		20	42.4	2.25	7.2	6.16	-	12.4	0.12	11.2	6.59	0.89	1.83	6.98	98.02	-	54	523	27	161	206	4881	25	263	133	10590	371	695	79.5	294	35.7	7.5	22.2	1.8	5.8	0.7	1.5	0.1	0.61	-	1.3	6.9	52
Mirnejad and Bell 2006	Wyoming, USA	Leucite Hills		LMP	137 PLB	Plio-Pleistocene		20	45.3	2.05	7.64	5.89	-	11	0.12	10.6	8.03	1.67	2.05	4.48	98.83	-	56	444	27	104	212	5719	27	529	136	7212	376	712	80.1	300	36	7.7	22.7	1.8	6.1	0.8	1.7	0.2	0.77	-	4.7	6.7	120
Mirnejad and Bell 2006	Wyoming, USA	Leucite Hills		LMP	138PLB	Plio-Pleistocene		20	42.9	2.26	7.57	6.3	-	12.1	0.12	11.3	7.4	0.54	1.78	6.03	98.3	-	109	541	26	155	258	4126	20	850	123	7556	373	740	74.9	273	34.9	6.6	16.5	2.1	5.9	0.7	0.8	0.1	0.4	0.11	20	8.81	52
Mirnejad and Bell 2006	Wyoming, USA	Leucite Hills		LMP	140PLB	Plio-Pleistocene		20	43	2.23	7.51	6.41	-	12.1	0.12	10.9	8.69	0.94	2.39	4.59	98.88	-	69	517	26	157	220	3814	27	253	123	9087	351	664	75	280	33.8	7.1	20.7	1.7	5.9	0.8	1.7	0.2	0.82	-	1.3	6.5	26
Mirnejad and Bell 2006	Wyoming, USA	Leucite Hills		LMP	119ZM	Plio-Pleistocene		20	55.1	2.73	9.87	0.06	-	4.11	4.28	6.28	11.5	0.98	1.29	3.23	99.43	-	90	343	21	226	288	1830	12.9	159	41.9	6240	119	236	27.5	96.8	12.8	2.7	8.02	0.7	3	0.5	0.9	0.1	0.37	0.04	1.4	2.6	32
Mirnejad and Bell 2006	Wyoming, USA	Leucite Hills		LMP	120ZM	Plio-Pleistocene		20	-	-	-	-	-	-	-	-	-	-	-	-	-	-	-	-	-	-	-	-	-	-	-	-	-	-	-	-	-	-	-	-	-	-	-	-	-	-	-	-	-
Mirnejad and Bell 2006	Wyoming, USA	Leucite Hills		LMP	122ZM	Plio-Pleistocene		20	-	-	-	-	-	-	-	-	-	-	-	-	-	-	-	-	-	-	-	-	-	-	-	-	-	-	-	-	-	-	-	-	-	-	-	-	-	-	-	-	-
Mirnejad and Bell 2006	Wyoming, USA	Leucite Hills		LMP	141NTM	Plio-Pleistocene		20	55.8	2.58	10	4.13	-	3.3	0.05	6.44	10.5	1.69	1.46	3.46	99.41	-	80	310	18	180	296	2020	15.7	265	39.6	6670	150	297	36.1	124	15.6	3.5	9.92	0.9	3.5	0.6	1.1	0.1	0.37	0.03	2.5	2.4	25
Mirnejad and Bell 2006	Wyoming, USA	Leucite Hills		LMP	143NTM	Plio-Pleistocene		20	-	-	-	-	-	-	-	-	-	-	-	-	-	-	-	-	-	-	-	-	-	-	-	-	-	-	-	-	-	-	-	-	-	-	-	-	-	-	-	-	-
Mirnejad and Bell 2006	Wyoming, USA	Leucite Hills		LMP	144NTM	Plio-Pleistocene		20	-	-	-	-	-	-	-	-	-	-	-	-	-	-	-	-	-	-	-	-	-	-	-	-	-	-	-	-	-	-	-	-	-	-	-	-	-	-	-	-	-
Mirnejad and Bell 2006	Wyoming, USA	Leucite Hills		LMP	146NTM	Plio-Pleistocene		20	-	-	-	-	-	-	-	-	-	-	-	-	-	-	-	-	-	-	-	-	-	-	-	-	-	-	-	-	-	-	-	-	-	-	-	-	-	-	-	-	-
Mirnejad and Bell 2006	Wyoming, USA	Leucite Hills		LMP	147MTM	Plio-Pleistocene		20	47.4	2.37	8.66	5.45	-	9.34	0.09	8.87	7.29	1.18	1.3	6.79	98.74	-	119	408	25	115	231	2965	16	808	97	8453	271	546	55.2	200	24.9	4.6	12.1	1.5	4.2	0.6	0.7	0.1	0.37	0.09	12	6.76	80
Mirnejad and Bell 2006	Wyoming, USA	Leucite Hills		LMP	149MTM	Plio-Pleistocene		20	48.3	2.55	8.63	5.65	-	8.78	0.1	9.09	9.57	0.96	1.4	4.48	99.51	-	114	415	24	156	302	3051	18	737	104	6451	262	504	56.3	208	24.1	5.1	14.5	1.2	4.1	0.6	1.2	0.1	0.6	-	8.1	4.9	47
Mirnejad and Bell 2006	Wyoming, USA	Leucite Hills		LMP	150STM	Plio-Pleistocene		20	53.9	2.39	9.12	4.72	-	4.02	0.06	9.79	11.4	1.08	1.57	2.31	100.36	-	86	477	28	333	266	2132	16	417	47	4471	140	271	31.1	118	15	3.3	9.86	0.9	3.5	0.5	1.1	0.1	0.59	0.06	3.3	2	23
Mirnejad and Bell 2006	Wyoming, USA	Leucite Hills		LMP	151STM	Plio-Pleistocene		20	53.1	2.39	9.07	4.61	-	3.86	0.06	9.72	10.5	1.17	1.35	2.31	98.14	-	85	473	26	275	281	2149	15	588	46	4777	133	269	31.1	112	15.4	3.5	7.5	0.8	3.5	0.5	0.8	0.1	0.52	0.09	3	2.22	29
Mirnejad and Bell 2006	Wyoming, USA	Leucite Hills		LMP	152STM	Plio-Pleistocene		20	-	-	-	-	-	-	-	-	-	-	-	-	-	-	-	-	-	-	-	-	-	-	-	-	-	-	-	-	-	-	-	-	-	-	-	-	-	-	-	-	-
Mirnejad and Bell 2006	Wyoming, USA	Leucite Hills		LMP	153STM	Plio-Pleistocene		20	-	-	-	-	-	-	-	-	-	-	-	-	-	-	-	-	-	-	-	-	-	-	-	-	-	-	-	-	-	-	-	-	-	-	-	-	-	-	-	-	-
Mirnejad and Bell 2006	Wyoming, USA	Leucite Hills		LMP	154STM	Plio-Pleistocene		20	-	-	-	-	-	-	-	-	-	-	-	-	-	-	-	-	-	-	-	-	-	-	-	-	-	-	-	-	-	-	-	-	-	-	-	-	-	-	-	-	-
Vollmer et al. 1984	Wyoming, USA	Leucite Hills		LMP	BT3	Plio-Pleistocene		20	45.5	2.4	8.4	6.3	-	10.1	-	9.7	6.9	0.9	2.4	-	92.6	-	-	511	28	192	215	6060	19	1210	116	7350	402	850	-	271	37.9	8	-	3.5	-	-	-	-	1.6	-	-	-	57
Vollmer et al. 1984	Wyoming, USA	Leucite Hills		LMP	BT4	Plio-Pleistocene		20	45.9678	2.30077	8.89054	6.5754	-	10.5777	-	10.2098	6.1716	0.862148	2.98163	-	94.5374	-	-	539.803	27.1214	197.006	195	5780	17.9909	1152.93	118.013	6500.1	390.933	847.041	-	295	39.1	7.88092	-	2.76445	-	-	-	-	1.71328	-	-	-	53.0497
Vollmer et al. 1984	Wyoming, USA	Leucite Hills		LMP	MT1	Plio-Pleistocene		20	44.0766	2.47108	7.91673	6.35136	-	10.4558	-	10.0158	7.79244	0.942807	2.72107	-	92.7437	-	-	539.387	27.2895	195.026	297	4050	17.4252	1328.9	121.265	7671.87	392.229	882.322	-	-	-	9.02393	-	3.91386	-	-	-	-	1.42145	-	-	-	55.8988
Vollmer et al. 1984	Wyoming, USA	Leucite Hills		LMP	MT2-2W	Plio-Pleistocene		20	47.2912	2.38115	7.72082	6.09806	-	9.857	-	10.3795	7.27608	0.854585	2.5355	-	94.3939	-	-	532.643	26.1845	205.813	256	2530	21.3137	1249.99	121.233	8653.29	411.839	830.256	-	-	25.1	7.32492	-	3.34716	-	-	-	-	1.61726	-	-	-	56.4406
Vollmer et al. 1984	Wyoming, USA	Leucite Hills		LMP	MT2-2M	Plio-Pleistocene		20	47.2009	2.43659	8.51509	5.93608	-	11.3602	-	9.47426	6.27809	0.911504	2.55942	-	94.6721	-	-	527.432	27.7627	196.374	255	2550	16.4795	1224.32	104.48	9555.72	389.885	802.534	-	221	22.9	7.24755	-	3.54498	-	-	-	-	1.73246	-	-	-	62.6984
Vollmer et al. 1984	Wyoming, USA	Leucite Hills		LMP	MT3	Plio-Pleistocene		20	45.9125	2.39362	8.59927	6.39049	-	9.62615	-	9.58597	6.38136	0.930576	1.96275	-	91.7827	-	-	476.641	29.4539	184.993	286	4040	21.8342	1254.91	124.862	8012.52	385.094	777.376	-	192	24.9	7.64344	-	2.84915	-	-	-	-	1.68494	-	-	-	54.183
Vollmer et al. 1984	Wyoming, USA	Leucite Hills		LMP	MT4	Plio-Pleistocene		20	46.651	2.33319	8.8412	6.50574	-	10.2364	-	9.32034	7.79232	0.853282	2.52728	-	95.0607	-	-	544.483	29.3812	203.286	312	2450	16.151	1232.37	99.6538	6014.46	385.468	845.992	-	-	-	8.22907	-	4.09772	-	-	-	-	1.63943	-	-	-	50.4787
Vollmer et al. 1984	Wyoming, USA	Leucite Hills		LMP	P1C	Plio-Pleistocene		20	45.1841	2.37367	9.09464	6.41219	-	10.2614	-	10.3635	6.59556	0.947426	2.46431	-	93.6968	-	-	551.02	27.3639	200.495	234	3980	16.9468	1246.63	122.254	9202.09	378.971	846.442	-	266	38.9	8.25989	-	3.91814	-	-	-	-	1.51666	-	-	-	65.4018
Vollmer et al. 1984	Wyoming, USA	Leucite Hills		LMP	P2	Plio-Pleistocene		20	44.5535	2.31204	8.49619	6.28793	-	11.6572	-	10.2457	7.22417	0.840886	2.89422	-	94.5119	-	-	467.249	26.4354	188.622	214	4110	16.7129	1306.14	123.609	9017.76	402.216	859.899	-	-	-	8.12295	-	3.25454	-	-	-	-	1.42333	-	-	-	50.99
Vollmer et al. 1984	Wyoming, USA	Leucite Hills		LMP	P3	Plio-Pleistocene		20	45.9614	2.39924	7.91416	6.32324	-	10.3166	-	9.50861	6.08618	0.936263	2.30916	-	91.7548	-	-	503.623	28.1533	176.604	219	5110	17.9451	1036.99	99.0222	8718.88	420.514	797.287	-	-	-	7.62584	-	3.51153	-	-	-	-	1.59144	-	-	-	57.3977
Vollmer et al. 1984	Wyoming, USA	Leucite Hills		LMP	P4	Plio-Pleistocene		20	43.892	2.3533	8.29757	6.04027	-	10.8065	-	8.9218	5.78429	0.863164	2.83913	-	89.798	-	-	463.54	27.2839	194.955	164	6300	21.3486	1160.67	133.235	8991.3	387.749	830.703	-	-	-	8.46857	-	2.88454	-	-	-	-	1.78849	-	-	-	48.7692
Vollmer et al. 1984	Wyoming, USA	Leucite Hills		LMP	P5	Plio-Pleistocene		20	46.4987	2.42622	8.36879	6.51416	-	10.3831	-	9.8264	7.48895	0.87382	1.9489	-	94.3291	-	-	480.505	29.5198	180.95	204	4810	20.2427	1264.31	131.628	8679.64	415.509	802.271	-	-	-	8.11674	-	3.80209	-	-	-	-	1.7854	-	-	-	57.0632
Vollmer et al. 1984	Wyoming, USA	Leucite Hills		LMP	P7	Plio-Pleistocene		20	46.9039	2.46014	9.08892	6.3003	-	10.2181	-	8.9279	5.67454	0.957618	1.87105	-	92.4024	-	-	538.863	26.0858	205.527	234	4610	20.0691	1056.02	128.301	5910.67	396.436	866.688	-	-	-	7.40563	-	4.27766	-	-	-	-	1.43256	-	-	-	59.7437
Vollmer et al. 1984	Wyoming, USA	Leucite Hills		LMP	B1	Plio-Pleistocene		20	53	2.6	9.8	4.5	-	4	-	7.3	10.9	1.2	1.8	-	95.1	-	-	350	20.4	256	130	3020	16.5	1270	50	5730	157	354	-	117	15.3	4.2	-	1.8	-	-	-	-	1.3	-	-	-	27
Vollmer et al. 1984	Wyoming, USA	Leucite Hills		LMP	B2C	Plio-Pleistocene		20	54.2884	2.58671	9.78638	4.2567	-	3.95486	-	7.73631	9.99841	1.1817	1.60831	-	95.3978	-	-	302.473	16.896	232.569	236	2420	16.5954	1447.19	45.8246	5968.01	170.542	390.541	-	141.746	16.26	3.94962	-	1.62761	-	-	-	-	1.36958	-	-	-	23.2574
Vollmer et al. 1984	Wyoming, USA	Leucite Hills		LMP	LH1	Plio-Pleistocene		20	51.5434	2.76657	9.72432	4.72802	-	4.60399	-	5.85707	10.049	1.28688	2.28182	-	92.8411	-	-	266.14	18.7859	211.67	460	2700	14.9327	1210.7	44.036	4694.06	125.451	302.148	-	131	16.2	4.16437	-	2.0535	-	-	-	-	1.25074	-	-	-	29.6672
Vollmer et al. 1984	Wyoming, USA	Leucite Hills		LMP	D3-2	Plio-Pleistocene		20	52.5003	2.79316	9.57792	4.77577	-	3.91573	-	7.17485	10.9496	1.13286	1.39023	-	94.2104	-	-	387.67	21.797	255.516	265	3630	16.0447	1054.52	56.719	4808.82	145.749	339.683	-	199	24.2	4.25321	-	2.26041	-	-	-	-	1.24908	-	-	-	28.2075
Vollmer et al. 1984	Wyoming, USA	Leucite Hills		LMP	S3	Plio-Pleistocene		20	52.1703	2.44025	9.68689	4.31966	-	4.58187	-	6.68494	10.3375	1.25789	2.3682	-	93.8475	-	-	329.839	21.3853	226.223	259	2470	14.4911	1044.9	57.3423	6785.16	187.719	374.765	-	141.55	14.6777	4.07197	-	1.86366	-	-	-	-	1.45981	-	-	-	29.4368
Vollmer et al. 1984	Wyoming, USA	Leucite Hills		LMP	ST2	Plio-Pleistocene		20	54.5987	2.7732	9.51281	4.17002	-	4.06604	-	5.78841	11.8942	1.30696	2.11491	-	96.2252	-	-	366.434	19.8743	270.157	263	2300	19.7745	1100.2	40.0828	5721.84	152.615	414.03	-	124	15	4.17438	-	2.25602	-	-	-	-	1.19886	-	-	-	27.7687
Vollmer et al. 1984	Wyoming, USA	Leucite Hills		LMP	ST4	Plio-Pleistocene		20	53.1257	2.7841	10.1221	4.19196	-	4.71006	-	6.11912	9.98384	1.36898	1.84212	-	94.248	-	-	295.398	17.5369	206.688	260	2310	13.3887	1456.59	40.867	6877.57	196.061	285.875	-	136.095	16.6127	4.50595	-	2.2293	-	-	-	-	1.44019	-	-	-	27.1021
Vollmer et al. 1984	Wyoming, USA	Leucite Hills		LMP	SM3	Plio-Pleistocene		20	54.379	2.57967	9.9017	4.22457	-	3.69654	-	5.68194	11.4693	1.07456	2.11903	-	95.1263	-	-	299.698	19.3329	276.774	323	1970	15.634	1504.57	50.1557	5403.65	138.161	428.922	-	97	15	3.57311	-	1.34419	-	-	-	-	1.19203	-	-	-	31.7295
Vollmer et al. 1984	Wyoming, USA	Leucite Hills		LMP	SM4	Plio-Pleistocene		20	54.3459	2.69358	9.68107	4.40839	-	4.065	-	7.84292	11.5239	1.19622	2.34709	-	98.1041	-	-	277.448	19.1791	234.748	297	2060	17.1604	1112.23	52.9791	5209.41	180.392	304.389	-	98	14.7	3.54764	-	1.71297	-	-	-	-	1.48619	-	-	-	30.737
Vollmer et al. 1984	Wyoming, USA	Leucite Hills		LMP	Z4	Plio-Pleistocene		20	52.4361	2.48891	9.31987	4.57332	-	4.43378	-	6.71394	10.1032	1.38394	2.38516	-	93.8382	-	-	345.443	19.5354	220.433	336	2810	14.043	1315.65	44.7586	4927.86	132.365	406.565	-	153	19	4.11494	-	1.30879	-	-	-	-	1.30967	-	-	-	32.1104
Vollmer et al. 1984	Wyoming, USA	Leucite Hills		LMP	Z6	Plio-Pleistocene		20	54.2686	2.71818	9.50029	4.31101	-	4.4586	-	7.88859	11.2619	1.3525	2.26493	-	98.0247	-	-	366.766	21.1681	302.559	286	3060	16.4284	1480.74	59.2681	5668.97	184.543	404.359	-	123.645	16.4917	3.7128	-	1.30198	-	-	-	-	1.37789	-	-	-	27.229
Lambert et al. 1995	Arkansans, USA	Praire Creek		LMP	MH-1	Creataceous		20	-	-	-	-	-	-	-	-	-	-	-	-	-	18.1	29.6	1440	62.4	1050	159	945	14.2	704	95.8	1440	145	288	31	102.1	12.3	2.94	9.58	0.89	2.82	0.44	1.15	0.12	0.79	0.11	14.7	5.04	17.5
Lambert et al. 1995	Arkansans, USA	Praire Creek		LMP	PC-3	Creataceous		20	-	-	-	-	-	-	-	-	-	-	-	-	-	15.8	43.4	1230	64.9	1120	162	839	11.8	656	100	1504	147	293	31.6	101.9	12.3	3.35	10.9	1.06	3.36	0.52	1.33	0.13	0.87	0.11	18.2	6.74	20.5
Badal et al. 2014	Arkansans, USA	Praire Creek		LMP	AK1	Creataceous		20	-	-	-	-	-	-	-	-	-	-	-	-	-	-	-	-	-	-	180	1070	-	-	85.3	3249	-	-	-	98	12.2	-	-	-	-	-	-	-	-	0.1	13.9	-	20.5
Badal et al. 2014	Arkansans, USA	Praire Creek		LMP	AK2	Creataceous		20	-	-	-	-	-	-	-	-	-	-	-	-	-	-	-	-	-	-	81.8	536	-	-	82	2035	-	-	-	186	22.1	-	-	-	-	-	-	-	-	0.32	16.3	-	41.6
Badal et al. 2014	Arkansans, USA	Praire Creek		LMP	AK4	Creataceous		20	-	-	-	-	-	-	-	-	-	-	-	-	-	-	-	-	-	-	204	567	-	-	85.8	1456	-	-	-	84.8	10.4	-	-	-	-	-	-	-	-	0.1	12.4	-	22.6
Fraser et al. 1985	Montana, USA	Smoky Butte		LMP	SB11	Oligocene		20	51.38	5.27	8.86	5.61	-	4.73	-	8.37	6.48	1.34	2.26	-	94.3	14	-	484	36.4	-	50	3150	-	-	-	9550	364	803	-	329	36.7	7.8	-	1.96	-	-	-	-	1.87	0.23	44.9	5.91	12.45
Fraser et al. 1985	Montana, USA	Smoky Butte		LMP	SB35	Oligocene		20	51.42	5.24	8.84	5.51	-	4.84	-	8.2	7.75	0.87	2.22	-	94.89	17.2	-	569	37.7	-	140	2928	-	-	-	11030	410	874	-	361	40.8	8.77	-	2.09	-	-	-	-	2.21	0.28	50.9	6.79	14.94
Fraser et al. 1985	Montana, USA	Smoky Butte		LMP	SB45	Oligocene		20	52.24	5.25	8.88	5.55	-	4.35	-	8.47	8.34	0.78	2.22	-	96.08	14.6	-	460	27	-	122	2332	-	-	-	9020	366	821	-	328	37	7.79	-	1.91	-	-	-	-	1.9	0.22	46.1	5.64	12.54
Fraser et al. 1985	Montana, USA	Smoky Butte		LMP	SB59	Oligocene		20	52.94	5.14	8.55	5.65	-	4.51	-	8.38	8.84	0.96	2.21	-	97.18	13	-	439	30.2	-	69	2686	-	-	-	9340	332	716	-	292	32.6	6.84	-	1.69	-	-	-	-	1.73	0.18	41.6	5.08	10.5
Fraser et al. 1985	Montana, USA	Smoky Butte		LMP	SB66	Oligocene		20	52.19	4.96	9.04	8.91	-	4.9	-	7.98	7.85	1.14	1.6	-	98.57	13.3	-	437	31.2	-	85	2915	-	-	-	8709	337	746	-	300	33.5	7.02	-	1.76	-	-	-	-	1.69	0.19	42.5	5.23	17.22
Fraser et al. 1985	Montana, USA	Smoky Butte		LMP	SB70	Oligocene		20	53.53	5.23	9.08	5.52	-	4.43	-	7.78	7.85	1.93	1.8	-	97.15	15.4	-	583	20.3	-	112	2226	-	-	-	20000	437	930	-	379	43.1	9.5	-	2.59	-	-	-	-	3.19	0.41	53.8	6.22	14.53
Davies et al. 2006	Russia	Aldan Shield		LMP	424/85	Cretaceous		20	43.84	0.54	4.91	6.82	5.93	7.61	-	22.7	2.9	0.74	0.5	2	98.49	-	185	590	99	700	87	912	11.1	50	2.3	2441	13.88	38.38	-	17.07	3.68	1.082	-	0.489	-	-	-	-	0.853	-	1.63	0.157	55.8
Davies et al. 2006	Russia	Aldan Shield		LMP	495/85	Cretaceous		20	44.97	0.48	4.63	6.18	4.88	9.16	-	21.43	3.1	0.92	0.33	2.72	98.8	-	157	670	86	630	151	681	8.9	41.4	1.43	1234	9.18	24.43	-	9.85	2.54	0.823	-	0.469	-	-	-	-	0.624	-	1.25	0.088	14.2
Davies et al. 2006	Russia	Aldan Shield		LMP	116/84	Cretaceous		20	42.38	0.58	4.6	8.67	3.66	6.87	-	21.96	3.09	0.72	0.54	5.27	98.34	21.5	-	1515	91	-	104	998	13.9	58.3	2.22	2903	15.4	37.1	-	13.38	3.51	1	-		-	-	-	-	0.76	-	1.63	0.143	24.9
Davies et al. 2006	Russia	Aldan Shield		LMP	19/86	Cretaceous		20	47.59	0.62	8.79	4.81	4.05	9.06	-	14	5.94	1.52	0.57	1.44	98.39	22.2	150	1100	56	470	288	561	13.1	107.5	3.53	2745	28.82	63.27	-	27.48	5.81	1.946	-	0.92	-	-	-	-	1.01	-	3.03	0.236	7.33
Davies et al. 2006	Russia	Aldan Shield		LMP	101/86	Cretaceous		20	47.76	0.71	9.18	4.7	5.26	7.61	-	13.86	5.72	1.48	0.73	1.65	98.66	25.5	196	630	52	360	129	1893	16.5	253	4.98	2548	21.1	51.71	-	24.91	5.67	1.529	-	0.7	-	-	-	-	0.771	-	5.34	0.277	26.4
Davies et al. 2006	Russia	Aldan Shield		LMP	126/86	Cretaceous		20	45.97	0.91	6.47	3.6	5.37	7.33	-	21.25	5.2	0.77	1.11	0.78	98.76	20.8	185	1160	62	900	177	1123	12	32.3	1.87	2071	34.81	98.11	-	40.39	6.42	2.45	-	0.752	-	-	-	-	0.758	-	1.03	0.125	5.41
Davies et al. 2006	Russia	Aldan Shield		LMP	127/86	Cretaceous		20	48.12	1.39	6.94	3.01	3.33	7.02	-	18.7	8.04	0.91	0.25	1.83	99.54	25.2	157	1180	42	73	235	727	5.21	43.6	2.48	1269	9.04	28.92	-	15.69	4.1	0.818	-		-	-	-	-	0.413	-	1.16	0.163	5.31
Davies et al. 2006	Russia	Aldan Shield		LMP	132/86	Cretaceous		20	44.77	1.01	8.66	5.15	5.19	6.55	-	14.25	7.58	1.5	1.91	2.23	98.8	21.8	213	1030	50	190	314	3145	20	113.9	7.61	2250	53.2	100.6	-	42.12	9.68	2.355	-		-	-	-	-	1.126	-	3.05	0.491	3.53
Davies et al. 2006	Russia	Aldan Shield		LMP	136/86	Cretaceous		20	47.1	1.02	8.16	4.39	4.84	8.98	-	8.52	7.55	2.57	0.32	4.8	98.25	-	340	270	39	120	268	3844	36	261	15.39	7991	66	137.58	-	52.79	10.18	2.67	-	1.05	-	-	-	-	0.85	-	6.09	0.91	62.4
Davies et al. 2006	Russia	Aldan Shield		LMP	68/88	Cretaceous		20	46.4	1.25	7.15	11.34	1.22	4.22	-	7.29	8.26	1.19	2.22	6.41	96.95	17	840	110	34	92	164	4139	30.5	403	25.11	12773	68.1	190.83	-	75.31	12.89	2.89	-	0.787	-	-	-	-	0.9	-	9.58	1.403	84
[truncated: 7 more columns]
